# Supplementary material for: Shotgun ion mobility mass spectrometry sequencing of heparan sulfate saccharides
Source: PubMed Central journal article supplement (PMC7083916; doi:10.1038/s41467-020-15284-y), 2020-03-20
Supplement: 41467_2020_15284_MOESM1_ESM.pdf [file 41467_2020_15284_MOESM1_ESM.pdf]

## Shotgun Ion Mobility Mass Spectrometry Sequencing of Heparan Sulfate Saccharides

Rebecca L. Miller<sup>1,2,3\*</sup>, Scott E. Guimond<sup>2,4</sup>, Ralf Schwörer<sup>5</sup>, Olga V. Zubkova<sup>5</sup>, Peter. C. Tyler<sup>5</sup>, Yongmei Xu<sup>6</sup>, Jian Liu<sup>6</sup>, Pradeep Chopra<sup>7</sup>, Geert-Jan Boons<sup>7,8</sup>, Márkó Grabarics<sup>9,10</sup>, Christian Manz<sup>9,10</sup>, Johanna Hofmann<sup>9,10</sup>, Niclas G. Karlsson<sup>11</sup>, Jeremy E. Turnbull<sup>1,2</sup>, Weston B. Struwe<sup>12</sup>, and Kevin Page<sup>9,10</sup>.

<sup>1</sup>Copenhagen Center for Glycomics, Department of Cellular & Molecular Medicine, University of Copenhagen, Copenhagen N 2200, Denmark.

<sup>2</sup>Centre for Glycobiology, Department of Biochemistry, Institute of Integrative Biology, University of Liverpool, Crown Street, Liverpool, L69 7ZB, United Kingdom.

<sup>3</sup>Laboratory of Cancer Biology, Department of Oncology, Medical Sciences Division, University of Oxford, Old Road Campus Research Building, Old Road Campus, Roosevelt Drive, Oxford OX3 7DQ, United Kingdom.

<sup>4</sup>Institute for Science and Technology in Medicine, School of Medicine, Keele University, Keele, Staffordshire, ST5 5BG, United Kingdom.

<sup>5</sup>Ferrier Research Institute, Victoria University of Wellington, 69 Gracefield Road, Gracefield, Lower Hutt 5010, New Zealand.

<sup>6</sup>Division of Chemical Biology and Medicinal Chemistry, Eshelman School of Pharmacy, University of North Carolina, Chapel Hill, North Carolina 27599, USA.

<sup>7</sup>Complex Carbohydrate Research Center, University of Georgia, 315 Riverbend Road, Athens, GA 30602, USA.

<sup>8</sup>Department of Chemical Biology and Drug Discovery, Utrecht Institute for Pharmaceutical Science, and Bijvoet Center for Biomolecular Research, Utrecht University, Universiteitsweg 99, 3584 CG Utrecht, The Netherlands.

<sup>9</sup>Freie Universitaet Berlin, Institute of Chemistry and Biochemistry, Takustrasse 3, 14195 Berlin, Germany.

<sup>10</sup>Fritz Haber Institute of the Max Planck Society, Faradayweg 4-6, 14195 Berlin, Germany.

<sup>11</sup>Department of Medical Biochemistry and Cell Biology, University of Gothenburg, Box 440, Medicinargatan 9A, 405 30 Gothenburg, Sweden.

<sup>12</sup>Department of Chemistry, Chemistry Research Laboratory, University of Oxford, Oxford, OX1 3QZ, United Kingdom.

## Supplementary Information

|                               |                                                                                                |
|-------------------------------|------------------------------------------------------------------------------------------------|
| <b>Supplementary Fig. 1.</b>  | SIMMS <sup>2</sup> method for sequencing a hexasaccharide.                                     |
| <b>Supplementary Fig. 2.</b>  | SIMMS <sup>2</sup> sequencing of isomeric 3 <i>O</i> - and 6 <i>O</i> -sulfated structures     |
| <b>Supplementary Fig. 3.</b>  | HS hexasaccharide purification and disaccharide analysis.                                      |
| <b>Supplementary Fig. 4.</b>  | Purification of HS oligosaccharides with FGF1/2 bioactivity.                                   |
| <b>Supplementary Fig. 5.</b>  | CCS of standard #10 using different DTIMS source conditions                                    |
| <b>Supplementary Table 1.</b> | Summary of the used library of standards.                                                      |
| <b>Supplementary Table 2.</b> | Summary of CCS values obtained from the standard library.                                      |
| <b>Supplementary Table 3.</b> | CCS of B, Y, C, Z ions - tetrasaccharides UA-GlcNAc6S-UA-GlcNAc6S-R <sub>1</sub>               |
| <b>Supplementary Table 4.</b> | CCS of B, Y, C, Z ions - tetrasaccharides UA-GlcNS6S-UA-GlcNS6S-R <sub>1</sub>                 |
| <b>Supplementary Table 5.</b> | CCS of B, Y, C, Z ions - tetrasaccharide G-GlcNS6S-I2S-GlcNS6S-R <sub>1</sub>                  |
| <b>Supplementary Table 6.</b> | CCS of B, Y, C, Z ions - hexasaccharide G-GlcNS6S-I-GlcNS6S-G-GlcNS6S-R <sub>1</sub> .         |
| <b>Supplementary Table 7.</b> | CCS of B, Y, C, Z ions - hexasaccharide GlcNAc6S-[G-GlcNAc6S] <sub>2</sub> -G-R <sub>2</sub> . |

|                                |                                                                                                                                                |
|--------------------------------|------------------------------------------------------------------------------------------------------------------------------------------------|
| <b>Supplementary Table 8.</b>  | CCS of B, Y, C, Z ions - hexasaccharide GlcNAc6S-[I-GlcNAc6S] <sub>2</sub> -I-R <sub>2</sub> .                                                 |
| <b>Supplementary Table 9.</b>  | CCS of B, Y, C, Z ions - octasaccharide GlcNAc6S-[I-GlcNAc6S] <sub>3</sub> -I-R <sub>2</sub> .                                                 |
| <b>Supplementary Table 10.</b> | CCS of B, Y, C, Z ions - octasaccharide GlcNAc6S-[G-GlcNAc6S] <sub>3</sub> -G-R <sub>2</sub> .                                                 |
| <b>Supplementary Table 11.</b> | CCS of B, Y, C, Z ions - octasaccharide GlcNAc6S-G-GlcNAc6S-G-GlcNAc6S-I-GlcNAc6S-I-R <sub>2</sub> .                                           |
| <b>Supplementary Table 12.</b> | CCS of B, Y, C, Z ions - octasaccharide GlcNAc6S-G-GlcNAc6S-I-GlcNAc6S-I-GlcNAc6S-G-R <sub>2</sub> .                                           |
| <b>Supplementary Table 13.</b> | CCS of B, Y, C, Z ions - octasaccharide GlcNAc6S-I-GlcNAc6S-G-GlcNAc6S-I-GlcNAc6S-G-R <sub>2</sub> .                                           |
| <b>Supplementary Table 14.</b> | CCS of B, Y, C, Z ions - octasaccharide GlcNAc6S-G-GlcNAc6S-I-GlcNAc6S-G-GlcNAc6S-I-R <sub>2</sub> .                                           |
| <b>Supplementary Table 15.</b> | CCS of B, Y, C, Z ions - nonasaccharide G-GlcNS-G-GlcNS-I-GlcNS-G-GlcNS-G-R <sub>3</sub> .                                                     |
| <b>Supplementary Table 16.</b> | CCS of B, Y, C, Z ions - nonasaccharide G-GlcNS-G-GlcNS-I <sub>2</sub> S-GlcNS-G-GlcNS-G-R <sub>3</sub> .                                      |
| <b>Supplementary Table 17.</b> | CCS of B, Y, C, Z ions - decaaccharide GlcNAc6S-[I-GlcNAc6S] <sub>4</sub> -I-R <sub>2</sub> .                                                  |
| <b>Supplementary Table 18.</b> | CCS of B, Y, C, Z ions - decaaccharide GlcNAc6S-[G-GlcNAc6S] <sub>4</sub> -G-R <sub>2</sub> .                                                  |
| <b>Supplementary Table 19.</b> | CCS of B, Y, C, Z ions - disaccharide ΔUA <sub>2</sub> S-GlcNS <sub>3</sub> S <sub>6</sub> S                                                   |
| <b>Supplementary Table 20.</b> | CCS of B, Y, C, Z ions - tetrasaccharide ΔUA-GlcNS-I <sub>2</sub> S-GlcNS <sub>3</sub> S                                                       |
| <b>Supplementary Table 21.</b> | CCS of B, Y, C, Z ions - tetrasaccharide ΔUA-GlcNS <sub>6</sub> S-G-GlcNS <sub>3</sub> S <sub>6</sub> S                                        |
| <b>Supplementary Table 22.</b> | CCS of B, Y, C, Z ions - tetrasaccharide ΔUA-GlcNAc6S-G-GlcNS <sub>3</sub> S <sub>6</sub> S                                                    |
| <b>Supplementary Table 23.</b> | CCS of B, Y, C, Z ions - G-GlcNS <sub>6</sub> S-G-GlcNS <sub>6</sub> S-I <sub>2</sub> S-GlcNS <sub>6</sub> S-R <sub>1</sub>                    |
| <b>Supplementary Table 24.</b> | CCS of B, Y, C, Z ions - G-GlcNS <sub>6</sub> S-G-GlcNS <sub>3</sub> S-I <sub>2</sub> S-GlcNS <sub>6</sub> S-R <sub>1</sub>                    |
| <b>Supplementary Table 25.</b> | CCS of B, Y, C, Z ions - G-GlcNS <sub>6</sub> S-G-GlcNS <sub>6</sub> S <sub>3</sub> S-I <sub>2</sub> S-GlcNS <sub>6</sub> S-R <sub>1</sub>     |
| <b>Supplementary Table 26.</b> | CCS of B, Y, C, Z ions - septasaccharide ΔUA-GlcNS-I <sub>2</sub> S-GlcNS-G-GlcNS-G-R <sub>3</sub> .                                           |
| <b>Supplementary Table 27.</b> | CCS of B, Y, C, Z -SO <sub>3</sub> ions - tetrasaccharides UA-GlcNAc6S-UA-GlcNAc6S-R <sub>1</sub>                                              |
| <b>Supplementary Table 28.</b> | CCS of B, Y, C, Z -SO <sub>3</sub> ions - tetrasaccharides G-GlcNS <sub>6</sub> S-I-GlcNS <sub>6</sub> S-R <sub>1</sub>                        |
| <b>Supplementary Table 29.</b> | CCS of B, Y, C, Z -SO <sub>3</sub> ions - tetrasaccharides I-GlcNS <sub>6</sub> S-G-GlcNS <sub>6</sub> S-R <sub>1</sub>                        |
| <b>Supplementary Table 30.</b> | CCS of B, Y, C, Z -SO <sub>3</sub> ions - tetrasaccharide G-GlcNS <sub>6</sub> S-I <sub>2</sub> S-GlcNS <sub>6</sub> S-R <sub>1</sub>          |
| <b>Supplementary Table 31.</b> | CCS of B, Y, C, Z -SO <sub>3</sub> ions - hexasaccharide G-GlcNS <sub>6</sub> S-I-GlcNS <sub>6</sub> S-G-GlcNS <sub>6</sub> S-R <sub>1</sub> . |
| <b>Supplementary Table 32.</b> | CCS of B, Y, C, Z -SO <sub>3</sub> ions - hexasaccharide GlcNAc6S-[G-GlcNAc6S] <sub>2</sub> -G-R <sub>2</sub> .                                |
| <b>Supplementary Table 33.</b> | CCS of B, Y, C, Z -SO <sub>3</sub> ions - hexasaccharide GlcNAc6S-[I-GlcNAc6S] <sub>2</sub> -I-R <sub>2</sub> .                                |
| <b>Supplementary Table 34.</b> | CCS of B, Y, C, Z -SO <sub>3</sub> ions - GlcNAc6S-[I-GlcNAc6S] <sub>3</sub> -I-R <sub>2</sub>                                                 |
| <b>Supplementary Table 35.</b> | CCS of B, Y, C, Z -SO <sub>3</sub> ions - octasaccharide GlcNAc6S-[G-GlcNAc6S] <sub>3</sub> -G-R <sub>2</sub> .                                |
| <b>Supplementary Table 36.</b> | CCS of B, Y, C, Z -SO <sub>3</sub> ions - octasaccharide GlcNAc6S-G-GlcNAc6S-G-GlcNAc6S-I-GlcNAc6S-I-R <sub>2</sub> .                          |
| <b>Supplementary Table 37.</b> | CCS of B, Y, C, Z -SO <sub>3</sub> ions - octasaccharide GlcNAc6S-G-GlcNAc6S-I-GlcNAc6S-I-GlcNAc6S-G-R <sub>2</sub> .                          |
| <b>Supplementary Table 38.</b> | CCS of B, Y, C, Z -SO <sub>3</sub> ions - octasaccharide GlcNAc6S-I-GlcNAc6S-G-GlcNAc6S-I-GlcNAc6S-G-R <sub>2</sub> .                          |
| <b>Supplementary Table 39.</b> | CCS of B, Y, C, Z -SO <sub>3</sub> ions - octasaccharide GlcNAc6S-G-GlcNAc6S-I-GlcNAc6S-G-GlcNAc6S-I-R <sub>2</sub> .                          |
| <b>Supplementary Table 40.</b> | CCS of B, Y, C, Z -SO <sub>3</sub> ions - nonasaccharide G-GlcNS-G-GlcNS-I-GlcNS-G-GlcNS-G-R <sub>3</sub> .                                    |
| <b>Supplementary Table 41.</b> | CCS of B, Y, C, Z -SO <sub>3</sub> ions - nonasaccharide G-GlcNS-G-GlcNS-I <sub>2</sub> S-GlcNS-G-GlcNS-G-R <sub>3</sub> .                     |
| <b>Supplementary Table 42.</b> | CCS of B, Y, C, Z -SO <sub>3</sub> ions - decaaccharide GlcNAc6S-[I-GlcNAc6S] <sub>4</sub> -I-R <sub>2</sub> .                                 |
| <b>Supplementary Table 43.</b> | CCS of B, Y, C, Z -SO <sub>3</sub> ions - decaaccharide GlcNAc6S-[G-GlcNAc6S] <sub>4</sub> -G-R <sub>2</sub> .                                 |
| <b>Supplementary Table 44.</b> | CCS of B, Y, C, Z -SO <sub>3</sub> ions - disaccharide ΔUA <sub>2</sub> S-GlcNS <sub>3</sub> S <sub>6</sub> S                                  |
| <b>Supplementary Table 45.</b> | CCS of B, Y, C, Z -SO <sub>3</sub> ions - tetrasaccharide ΔUA-GlcNS-I <sub>2</sub> S-GlcNS <sub>3</sub> S                                      |

|                                |                                                                                                          |
|--------------------------------|----------------------------------------------------------------------------------------------------------|
| <b>Supplementary Table 46</b>  | CCS of B, Y, C, Z -SO <sub>3</sub> ions - tetrasaccharide ΔUA-GlcNS6S-G-GlcNS3S6S                        |
| <b>Supplementary Table 47</b>  | CCS of B, Y, C, Z -SO <sub>3</sub> ions - tetrasaccharide ΔUA-GlcNAc6S-G-GlcNS3S6S                       |
| <b>Supplementary Table 48</b>  | CCS of B, Y, C, Z ions - G-GlcNS6S-G-GlcNS6S-I2S-GlcNS6S-R <sub>1</sub>                                  |
| <b>Supplementary Table 49</b>  | CCS of B, Y, C, Z ions - G-GlcNS6S-G-GlcNS3S-I2S-GlcNS6S-R <sub>1</sub>                                  |
| <b>Supplementary Table 50</b>  | CCS of B, Y, C, Z ions - G-GlcNS6S-G-GlcNS6S3S-I2S-GlcNS6S-R <sub>1</sub>                                |
| <b>Supplementary Table 51.</b> | CCS of B, Y, C, Z -SO <sub>3</sub> ions - septasaccharide ΔUA-GlcNS-I2S-GlcNS-G-GlcNS-G-R <sub>3</sub> . |
| <b>Supplementary Table 52.</b> | Theoretically ions - dp6+3SO <sub>3</sub> +1NAc, ΔUA-GlcNS-UA-GlcNAc-UA2S-GlcNS.                         |
| <b>Supplementary Table 53</b>  | Theoretically ions - dp6+3SO <sub>3</sub> +1NAc, ΔUA-GlcNS-UA2S-GlcNS-UA-GlcNAc.                         |
| <b>Supplementary Table 54.</b> | Theoretically ions - dp6+3SO <sub>3</sub> +1NAc, ΔUA-GlcNAc-UA-GlcNS-UA2S-GlcNS                          |
| <b>Supplementary Table 55.</b> | Theoretically ions - dp6+3SO <sub>3</sub> +1NAc, ΔUA-GlcNAc-UA2S-GlcNS-UA-GlcNS.                         |
| <b>Supplementary Table 56.</b> | Theoretically ions - dp6+3SO <sub>3</sub> +1NAc, ΔUA2S-GlcNS-UA-GlcNS-UA-GlcNAc.                         |
| <b>Supplementary Table 57.</b> | Theoretically ions - dp6+3SO <sub>3</sub> +1NAc, ΔUA2S-GlcNS-UA-GlcNAc-UA-GlcNS.                         |
| <b>Supplementary Table 58.</b> | Summary overview of the B, Y, C and Z ions for dp6+3SO <sub>3</sub> +1NAc.                               |
| <b>Supplementary Table 59.</b> | CCS of B, Y, C and Z ions - ΔUA-GlcNS-I2S-GlcNS-G-GlcNAc.                                                |
| <b>Supplementary Table 60</b>  | CCS of B, Y, C and Z -SO <sub>3</sub> ions - ΔUA-GlcNS-I2S-GlcNS-G-GlcNAc                                |
| <b>Supplementary Table 61.</b> | Theoretically ions - dp6+5SO <sub>3</sub> +1NAc, ΔUA-GlcNS-UA-GlcNAc6S-UA2S-GlcNS6S.                     |
| <b>Supplementary Table 62.</b> | Theoretically ions - dp6+5SO <sub>3</sub> +1NAc, ΔUA-GlcNS-UA2S-GlcNS6S-UA-GlcNAc6S.                     |
| <b>Supplementary Table 63.</b> | Theoretically ions - dp6+5SO <sub>3</sub> +1NAc, ΔUA-GlcNAc6S-UA-GlcNS-UA2S-GlcNS6S                      |
| <b>Supplementary Table 64.</b> | Theoretically ions - dp6+5SO <sub>3</sub> +1NAc, ΔUA-GlcNAc6S-UA2S-GlcNS6S-UA-GlcNS                      |
| <b>Supplementary Table 65.</b> | Theoretically ions - dp6+5SO <sub>3</sub> +1NAc, ΔUA2S-GlcNS6S-UA-GlcNS-UA-GlcNAc6S                      |
| <b>Supplementary Table 66.</b> | Theoretically ions - dp6+5SO <sub>3</sub> +1NAc, ΔUA2S-GlcNS6S-UA-GlcNAc6S-UA-GlcNS                      |
| <b>Supplementary Table 67.</b> | Summary overview of the B, Y, C and Z ions for dp6+5SO <sub>3</sub> +1NAc.                               |
| <b>Supplementary Table 68.</b> | CCS of B, Y, C and Z ions - ΔUA-GlcNS-I2S-GlcNS6S-UA-GlcNAc6S                                            |
| <b>Supplementary Table 69</b>  | CCS of B, Y, C and Z -SO <sub>3</sub> ions - ΔUA-GlcNS-I2S-GlcNS6S-UA-GlcNAc6S                           |

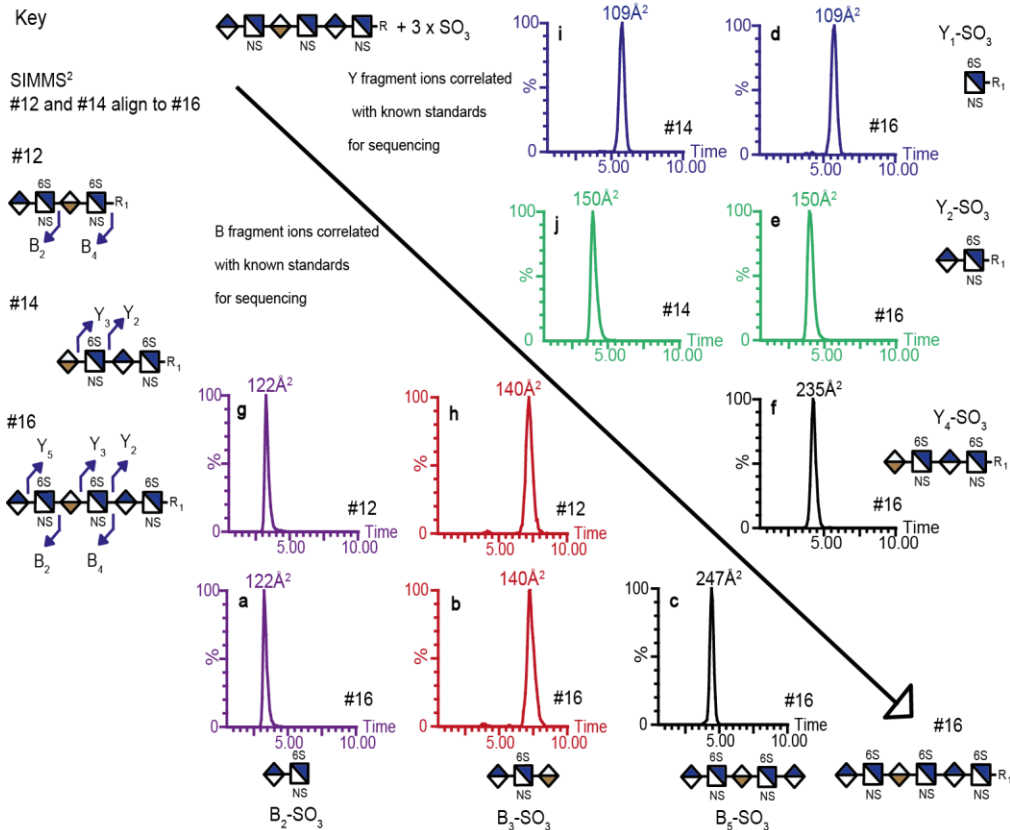

37

38 **Supplementary Fig. 1. Using the SIMMS<sup>2</sup> method for sequencing a hexasaccharide.** Overlaying two  
 39 tetrasaccharide standard structures (#12 and #14) provides complete sequence coverage of the  
 40 hexasaccharide (#16). Each structure was fragmented in the trap of the mass spectrometer and analysed  
 41 using DTIMS, resulting in accurate CCS values. A comparison of overlapping fragment ions displayed  
 42 the same CCS value between the two tetra- and hexasaccharides, providing a three-dimensional (MS,  
 43 MS/MS and IMMS) sequencing method. **a-f**, The hexasaccharide #16 displays the DTIMS data to be  
 44 determined. **g-h**, Tetrasaccharide #12 displayed CCS values from B<sup>-</sup>SO<sub>3</sub> ions; B<sub>2</sub>-SO<sub>3</sub> – 122Å<sup>2</sup> and B<sub>3</sub>-  
 45 SO<sub>3</sub> – 140Å<sup>2</sup> matched CCS values observed in the hexasaccharide (a-c). **i-j**, Tetrasaccharide #14  
 46 displayed CCS values from Y ions; Y<sub>1</sub>-SO<sub>3</sub> 109Å<sup>2</sup> and Y<sub>3</sub>-SO<sub>3</sub> 150Å<sup>2</sup> matched the CCS values observed  
 47 in the hexasaccharide **d-f**.

48

49

50

51

52

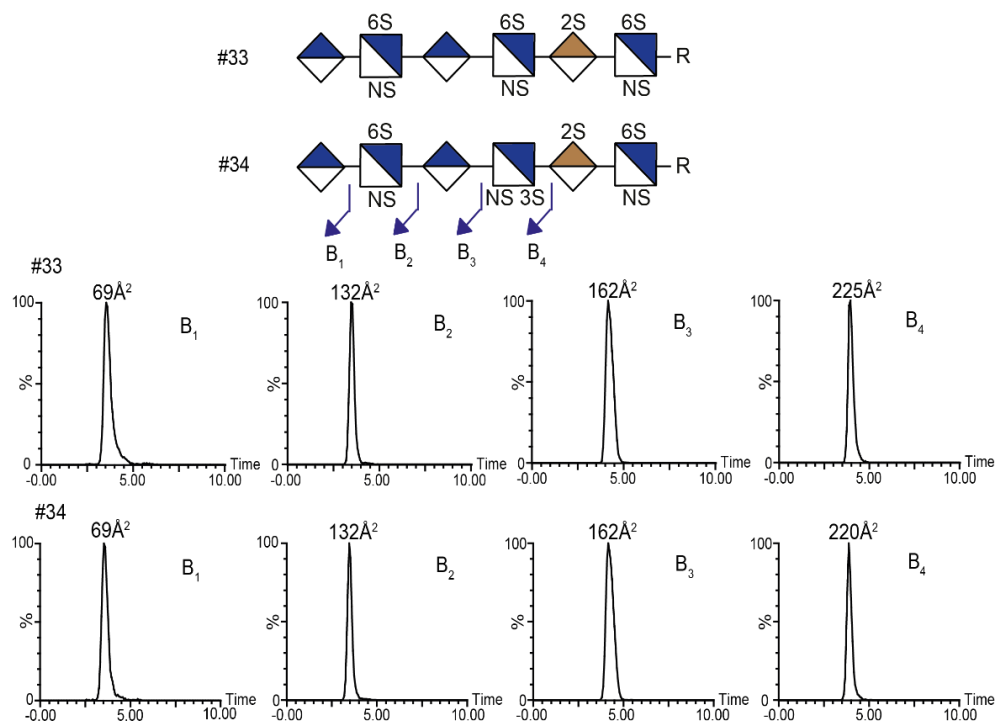

53

54 **Supplementary Figure 2. SIMMS<sup>2</sup> sequencing of two hexasaccharides differing in a single 3O- and**  
 55 **6O-sulfation.** HS structures #33 and #34 were fragmented in the trap and separated through IMMS to  
 56 create a defined set of CCS values for each fragment. B ion fragments from #33 and #34 showed a  
 57 difference at B<sub>4</sub> with the 6O-sulfated isomer (#33) showing a CCS value of 225 Å<sup>2</sup> and the B<sub>4</sub> fragment  
 58 for 3O-sulfation (#34) demonstrating a CCS value of 220 Å<sup>2</sup> respectively. Fragment ions from B/Y/C/Z  
 59 are displayed in **Supplementary Tables 23 and 24.**

60

61

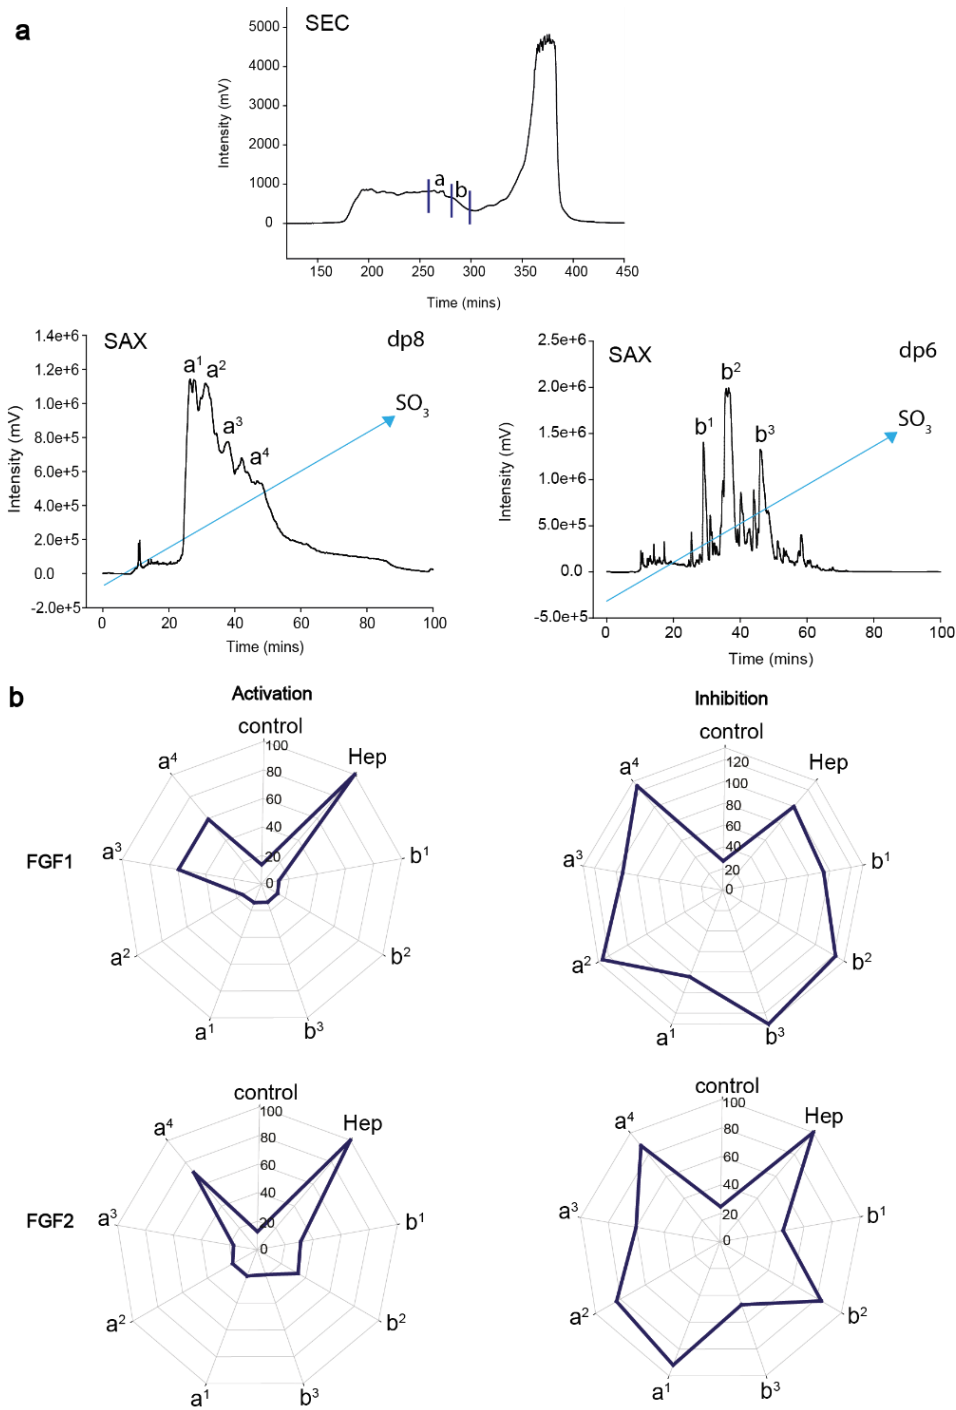

62

63 **Supplementary Fig. 3. Purification of HS oligosaccharides with FGF1/2 bioactivity from porcine**  
 64 **HS. a**, Heparinase III digested porcine HS was separated by SEC and fractions a and b (corresponding to  
 65 a dp8 and dp6, respectively) were further separated by SAX-HPLC to yield fractions a<sup>1-4</sup> and b<sup>1-3</sup>. **b**,  
 66 Radar charts illustrating BaF3 cell activation and inhibition of fractions a<sup>1-4</sup> and b<sup>1-3</sup>. Activation assays  
 67 were performed with FGF1 or FGF2 (1 ng/mL) and fractions as indicated. Heparin (3 μg/mL) was used as  
 68 positive control, while FGF1 or FGF2 alone was used as negative. Inhibition assays were performed with  
 69 the same fractions (3 μg/mL) in the presence of a sub-maximal dose of heparin (0.1 μg/mL). Cell  
 70 proliferation results were expressed as a percentage of heparin activity set as 100%.

71

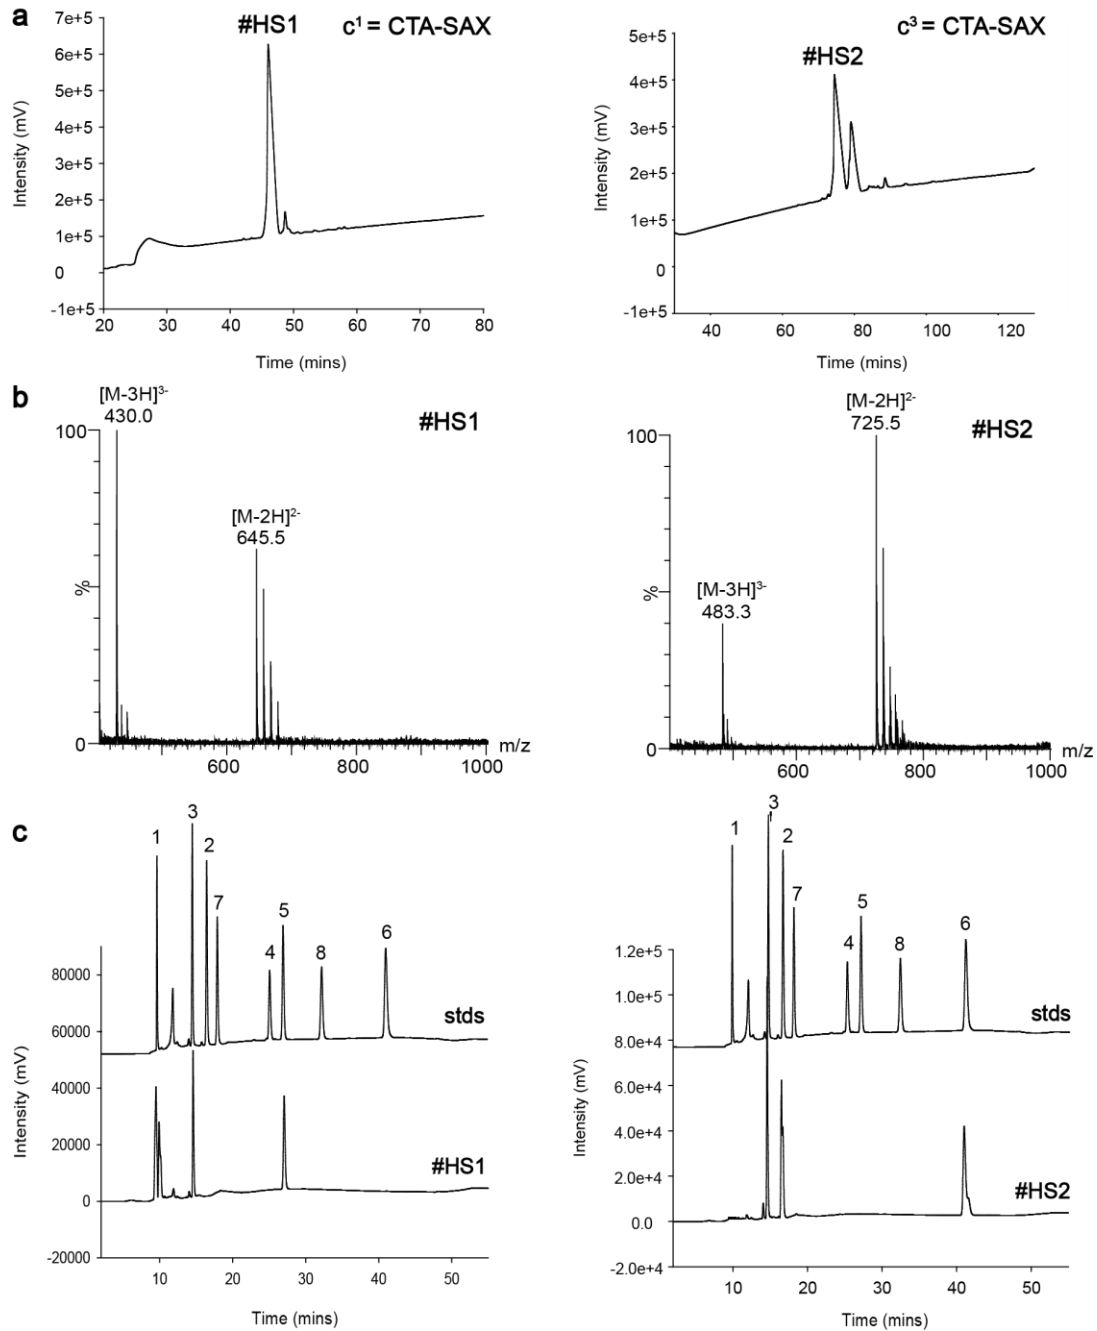

72

73 **Supplementary Fig. 4. Isolation of pure hexasaccharides and their resulting disaccharide**  
 74 **composition.** **a**, Bioactive inhibitory hexasaccharides were purified further with CTA-SAX HPLC. **b**,  
 75 Isolated CTA-SAX fractions #HS1 and #HS2 were subjected to mass spectrometry to confirm purity and  
 76 mass. **c**, Disaccharide analysis of #HS1 and #HS2 through complete digestion to disaccharide products  
 77 and separation on SAX ProPac PA1 (compared to authentic standards). Structure #HS1 contained  $\Delta$ UA-  
 78 GlcNAc,  $\Delta$ UA-GlcNS and  $\Delta$ UA2S-GlcNS, whereas structure #HS2 was composed of  $\Delta$ UA-GlcNS,  
 79  $\Delta$ UA-GlcNAc6S and  $\Delta$ UA2S-GlcNS6S. Standards are 1-  $\Delta$ UA-GlcNAc, 2 -  $\Delta$ UA-GlcNAc6S, 3 -  $\Delta$ UA-  
 80 GlcNS, 4 -  $\Delta$ UA-GlcNS6S, 5 -  $\Delta$ UA2S-GlcNS, 6 -  $\Delta$ UA2S-GlcNS6S, 7 -  $\Delta$ UA2S-GlcNAc, 8 -  $\Delta$ UA2S-  
 81 GlcNAc6S.

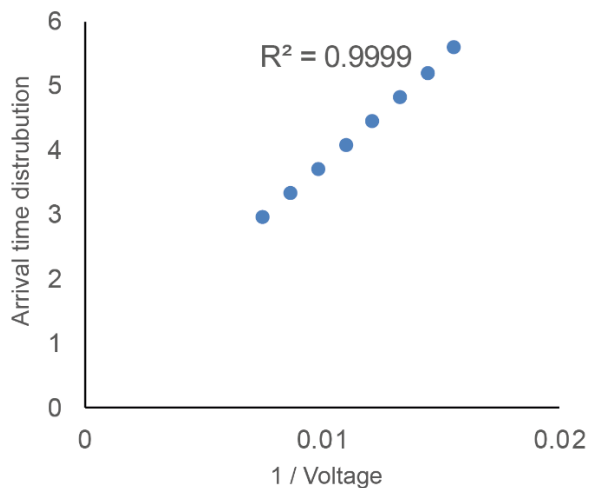

82  
83

|                  | Capillary - 0.6kV | Capillary - 0.8kV |
|------------------|-------------------|-------------------|
| Sample Cone - 2  | 210.33 (0.4)      | 210.60 (0.3)      |
| Sample Cone - 20 | 210.70 (0.3)      | 210.38 (0.3)      |

84  
85  
86  
87  
88  
89  
90

**Supplementary Fig. 5. CCS of #10 using different DTIMS source conditions.** Standard #10 was sprayed at a capillary voltage of 0.6 kV and 0.8 kV and a sample cone voltage of 2 and 20. The CCS value of #10 was determined from 8 DTIMS voltage measurements.



91 **Supplementary Table 1.** Summary of the used library of standards.

| No. | Chemdraw Structure                                                                  | Structure <sup>1</sup>               |
|-----|-------------------------------------------------------------------------------------|--------------------------------------|
| #1  | 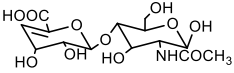   | ΔUA-GlcNAc                           |
| #2  |    | ΔUA-GlcNAc6S                         |
| #3  |    | ΔUA-GlcNS                            |
| #4  |    | ΔUA-GlcNS6S                          |
| #5  |    | ΔUA2S-GlcNS                          |
| #6  |   | ΔUA2S-GlcNS6S                        |
| #7  |  | ΔUA2S-GlcNAc                         |
| #8  |  | ΔUA2S-GlcNAc6S                       |
| #9  |  | G-GlcNAc6S-G-GlcNAc6S-R <sub>1</sub> |

|     |  |                                                      |
|-----|--|------------------------------------------------------|
| #10 |  | I-GlcNAc6S-I-GlcNAc6S-R <sub>1</sub>                 |
| #11 |  | G-GlcNAc6S-I-GlcNAc6S-R <sub>1</sub>                 |
| #12 |  | G-GlcNS6S-I-GlcNS6S-R <sub>1</sub>                   |
| #13 |  | I-GlcNAc6S-G-GlcNAc6S-R <sub>1</sub>                 |
| #14 |  | I-GlcNS6S-G-GlcNS6S-R <sub>1</sub>                   |
| #15 |  | G-GlcNS6S-I2S-GlcNS6S-R <sub>1</sub>                 |
| #16 |  | G-GlcNS6S-I-GlcNS6S-G-GlcNS6S-R <sub>1</sub>         |
| #17 |  | GlcNAc6S-[G-GlcNAc6S] <sub>2</sub> -G-R <sub>2</sub> |
| #18 |  | GlcNAc6S-[I-GlcNAc6S] <sub>2</sub> -I-R <sub>2</sub> |
| #19 |  | GlcNAc6S-[I-GlcNAc6S] <sub>3</sub> -I-R <sub>2</sub> |
| #20 |  | GlcNAc6S-[G-GlcNAc6S] <sub>3</sub> -G-R <sub>2</sub> |

|     |                                                                                                                                                                                                                                                                                                                                                                                                                |                                                                   |
|-----|----------------------------------------------------------------------------------------------------------------------------------------------------------------------------------------------------------------------------------------------------------------------------------------------------------------------------------------------------------------------------------------------------------------|-------------------------------------------------------------------|
| #21 | 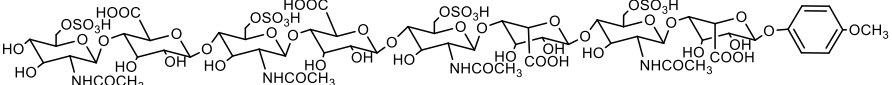 <p>Chemical structure of a branched oligosaccharide consisting of four N-acetylglucosamine (GlcNAc) units. The first three units are linked in a linear chain (GlcNAc6S-G-GlcNAc6S-G-GlcNAc6S-I), and the fourth unit is branched off the second unit (GlcNAc6S-I). The terminal unit is a 4-O-methylphenyl group (R2).</p> | GlcNAc6S-G-GlcNAc6S-G-GlcNAc6S-I-GlcNAc6S-I-R <sub>2</sub>        |
| #22 |  <p>Chemical structure of a branched oligosaccharide consisting of four N-acetylglucosamine (GlcNAc) units. The first three units are linked in a linear chain (GlcNAc6S-G-GlcNAc6S-I-GlcNAc6S-I), and the fourth unit is branched off the second unit (GlcNAc6S-G). The terminal unit is a 4-O-methylphenyl group (R2).</p> | GlcNAc6S-G-GlcNAc6S-I-GlcNAc6S-I-GlcNAc6S-G-R <sub>2</sub>        |
| #23 |  <p>Chemical structure of a branched oligosaccharide consisting of four N-acetylglucosamine (GlcNAc) units. The first three units are linked in a linear chain (GlcNAc6S-I-GlcNAc6S-G-GlcNAc6S-I), and the fourth unit is branched off the second unit (GlcNAc6S-G). The terminal unit is a 4-O-methylphenyl group (R2).</p> | GlcNAc6S-I-GlcNAc6S-G-GlcNAc6S-I-GlcNAc6S-G-R <sub>2</sub>        |
| #24 |  <p>Chemical structure of a branched oligosaccharide consisting of four N-acetylglucosamine (GlcNAc) units. The first three units are linked in a linear chain (GlcNAc6S-G-GlcNAc6S-I-GlcNAc6S-G), and the fourth unit is branched off the second unit (GlcNAc6S-I). The terminal unit is a 4-O-methylphenyl group (R2).</p> | GlcNAc6S-G-GlcNAc6S-I-GlcNAc6S-G-GlcNAc6S-I-R <sub>2</sub>        |
| #25 |  <p>Chemical structure of a branched oligosaccharide consisting of four N-sulfoglucosamine (GlcNS) units. The first three units are linked in a linear chain (GlcNS-G-GlcNS-I-GlcNS-G), and the fourth unit is branched off the second unit (GlcNS-G). The terminal unit is a 4-nitrophenyl group (R3).</p>                  | G-GlcNS-G-GlcNS-I-GlcNS-G-GlcNS-G-R <sub>3</sub>                  |
| #26 |  <p>Chemical structure of a branched oligosaccharide consisting of four N-sulfoglucosamine (GlcNS) units. The first three units are linked in a linear chain (GlcNS-G-GlcNS-I<sub>2</sub>S-GlcNS-G), and the fourth unit is branched off the second unit (GlcNS-G). The terminal unit is a 4-nitrophenyl group (R3).</p>     | G-GlcNS-G-GlcNS-I <sub>2</sub> S-GlcNS-G-GlcNS-G-R <sub>3</sub>   |
| #27 |  <p>Chemical structure of a branched oligosaccharide consisting of five N-acetylglucosamine (GlcNAc) units. A central GlcNAc6S unit is linked to four other GlcNAc6S units in a branched arrangement. The terminal unit is a 4-O-methylphenyl group (R2).</p>                                                                | GlcNAc6S-[I-GlcNAc6S] <sub>4</sub> -I-R <sub>2</sub>              |
| #28 |  <p>Chemical structure of a branched oligosaccharide consisting of five N-acetylglucosamine (GlcNAc) units. A central GlcNAc6S unit is linked to four other GlcNAc6S units in a branched arrangement. The terminal unit is a 4-O-methylphenyl group (R2).</p>                                                               | GlcNAc6S-[G-GlcNAc6S] <sub>4</sub> -G-R <sub>2</sub>              |
| #29 |  <p>Chemical structure of a branched oligosaccharide consisting of three N-sulfoglucosamine (GlcNS) units. The first unit is a 2-sulfated uronic acid (ΔUA2S), and the other two are 6-sulfated N-sulfoglucosamine units (GlcNS3S6S).</p>                                                                                  | ΔUA <sub>2</sub> S-GlcNS <sub>3</sub> S <sub>6</sub> S            |
| #30 |  <p>Chemical structure of a branched oligosaccharide consisting of three N-sulfoglucosamine (GlcNS) units. The first unit is a 2-sulfated uronic acid (ΔUA), and the other two are 3-sulfated N-sulfoglucosamine units (GlcNS3S).</p>                                                                                      | ΔUA-GlcNS-IdoA <sub>2</sub> S-GlcNS <sub>3</sub> S                |
| #31 |  <p>Chemical structure of a branched oligosaccharide consisting of three N-sulfoglucosamine (GlcNS) units. The first unit is a 2-sulfated uronic acid (ΔUA), and the other two are 6-sulfated N-sulfoglucosamine units (GlcNS3S6S).</p>                                                                                    | ΔUA-GlcNS <sub>6</sub> S-GlcA-GlcNS <sub>3</sub> S <sub>6</sub> S |

|     |                                                                                    |                                                  |
|-----|------------------------------------------------------------------------------------|--------------------------------------------------|
| #32 | 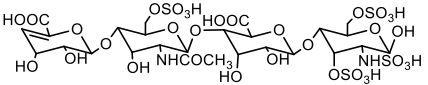  | ΔUA-GlcNAc6S-GlcA-GlcNS3S6S                      |
| #33 |  | G-GlcNS6S-G-GlcNS6S-I2S-GlcNS6S-R <sub>1</sub>   |
| #34 |  | G-GlcNS6S-G-GlcNS3S-I2S-GlcNS6S-R <sub>1</sub>   |
| #35 |  | G-GlcNS6S-G-GlcNS3S6S-I2S-GlcNS6S-R <sub>1</sub> |
| #36 |  | ΔUA-GlcNS-I2S-GlcNS-G-GlcNS-G-R <sub>3</sub>     |

92

93 <sup>1</sup> The GlcA residues are represented by G and the IdoA residues represented by I. Tags R<sub>1</sub> is (CH<sub>2</sub>)<sub>5</sub>NH<sub>2</sub>, R<sub>2</sub> is C<sub>7</sub>H<sub>7</sub>O and R<sub>3</sub> is C<sub>6</sub>H<sub>4</sub>NO<sub>2</sub>.

94 <sup>2</sup> Standard #26 was digested with heparinase II and then separated using SAX, resulting in the purification of the dp7 + 2OS (#36) required.

95

96 **Supplementary Table 2.** Summary of CCS values obtained from the standard library.

|     | CCS (1-) <sup>1</sup>    | CCS (2-)    | CCS (3-)                 | CCS (4-)                      | CCS (5-)    |
|-----|--------------------------|-------------|--------------------------|-------------------------------|-------------|
| #1  | 111.9 (0.3) <sup>2</sup> |             |                          |                               |             |
| #2  | 121.0 (0.5)              |             |                          |                               |             |
| #3  | 112.4 (0.4)              |             |                          |                               |             |
| #4  | 123.5 (0.1)              |             |                          |                               |             |
| #5  | 124.3 (0.2)              |             |                          |                               |             |
| #6  | 137.4 (0.5)              |             |                          |                               |             |
| #7  | 123.6 (0.5)              |             |                          |                               |             |
| #8  | 134.2 (0.5)              |             |                          |                               |             |
| #9  |                          | 206.2 (0.8) | 214.2<br>(0.7)/247 (0.9) |                               |             |
| #10 |                          | 210.1 (0.5) | 242.0 (0.2)              |                               |             |
| #11 |                          | 206.8 (0.5) | 232.4 (0.7)              |                               |             |
| #12 |                          | 200.1 (0.9) | 236.2 (0.2)              |                               |             |
| #13 |                          | 208.7 (0.4) | 245.5 (0.7)              |                               |             |
| #14 |                          | 201.5 (0.8) | 234.0 (0.1)              |                               |             |
| #15 |                          | 203.9 (0.5) | 238.8 (0.5)              |                               |             |
| #16 |                          | 255.6 (0.9) | 258.8 (0.8)              |                               |             |
| #17 |                          | 266.8 (0.6) | 296.5 (0.4)              | 347.4 (0.2)                   |             |
| #18 |                          | 265.8 (0.2) | 292.4 (0.4)              | 342.2 (0.5)                   |             |
| #19 |                          |             |                          | 379.8<br>(0.7)/416.0<br>(0.2) | 433.8 (0.5) |
| #20 |                          |             |                          | 391.4 (0.8)                   | 442.9 (0.2) |
| #21 |                          |             |                          | 379.2 (0.8)                   | 438.5 (0.5) |
| #22 |                          |             |                          | 396.5 (0.7)                   | 440.8 (0.5) |
| #23 |                          |             |                          | 400.8 (0.3)                   | 435.6 (0.4) |
| #24 |                          |             |                          | 378.3 (0.5)                   | 439.7 (0.4) |
| #25 |                          |             |                          | 437.4 (0.3)                   | 438.4 (0.8) |
| #26 |                          |             |                          | 441.4 (0.3)                   | 445.7 (0.5) |
| #27 |                          |             |                          |                               | 499.8 (0.4) |
| #28 |                          |             |                          |                               | 496.1 (0.7) |
| #29 |                          | 149.7 (0.2) |                          |                               |             |
| #30 |                          |             | 228.0 (0.1)              |                               |             |
| #31 |                          |             | 228.9 (0.3)              |                               |             |
| #32 |                          |             | 234.5 (0.1)              |                               |             |
| #33 |                          |             | 280.5 (0.1)              | 339.5 (0.3)                   |             |
| #34 |                          |             | 282.4 (0.4)              |                               |             |
| #35 |                          |             |                          | 328.3 (0.6)                   |             |
| #36 |                          |             |                          | 363.2 (0.8)                   |             |

97

98 <sup>1</sup> Columns represent different charge states.

99 <sup>2</sup> Each CCS is an average of independent measurements with the corresponding standard deviation

100 **Supplementary Table 3.** CCS of B, Y, C and Z ions identified in isomeric tetrasaccharide UA-GlcNAc6S-UA-GlcNAc6S-R<sub>+</sub> structures, where R<sub>1</sub> is  
 101 (CH<sub>2</sub>)<sub>5</sub>NH<sub>2</sub>.

|                      |                   |        | #9                                   |                          | #10                                  |             | #11                                  |             | #13                                  |             |
|----------------------|-------------------|--------|--------------------------------------|--------------------------|--------------------------------------|-------------|--------------------------------------|-------------|--------------------------------------|-------------|
|                      |                   |        | G-GlcNAc6S-G-GlcNAc6S-R <sub>1</sub> |                          | I-GlcNAc6S-I-GlcNAc6S-R <sub>1</sub> |             | G-GlcNAc6S-I-GlcNAc6S-R <sub>1</sub> |             | I-GlcNAc6S-G-GlcNAc6S-R <sub>1</sub> |             |
| [M-2H] <sup>2-</sup> |                   |        | 509.61                               | 206.2 (0.8) <sup>2</sup> | 509.61                               | 210.1 (0.5) | 509.61                               | 206.8 (0.5) | 509.61                               | 208.7 (0.4) |
| [M-3H] <sup>3-</sup> |                   |        | 339.4                                | 214.2 (0.7)/247 (0.9)    | 339.4                                | 242.0 (0.2) | 339.4                                | 232.4 (0.7) | 339.4                                | 245.5 (0.7) |
|                      | (1-) <sup>1</sup> | (2-)   | (1-) <sup>1</sup>                    | (2-)                     | (1-)                                 | (2-)        | (1-)                                 | (2-)        | (1-)                                 | (2-)        |
| B1                   | 175.02            | 87.01  | x                                    | x                        | x                                    | x           | x                                    | x           | x                                    | x           |
| B2                   | 458.06            | 228.53 | 120.9 (0.3)                          | x                        | 121.5 (0.5)                          | x           | 121.5 (0.3)                          | x           | 120.8 (0.1)                          | x           |
| B3                   | 634.09            | 316.54 | 150.6 (0.1)                          | x                        | 150.7 (0.5)                          | x           | 150.7 (0.5)                          | x           | 150.5 (0.11)                         | x           |
| B4                   | 917.13            | 458.06 | x                                    | x                        | x                                    | x           | x                                    | x           | x                                    | x           |
| Y0                   | 102.09            | 50.54  | x                                    | x                        | x                                    | x           | x                                    | x           | x                                    | x           |
| Y1                   | 385.13            | 192.06 | 120.1 (0.5)                          | x                        | 119.7 (0.6)                          | x           | 119.8 (0.2)                          | x           | 120.2 (0.5)                          | x           |
| Y2                   | 561.16            | 280.08 | x                                    | x                        | 145.27 (0.1)                         | 161.5 (0.3) | 145.9 (0.4)                          | 161.9 (0.2) | x                                    | x           |
| Y3                   | 844.20            | 421.59 | x                                    | 188.9 (0.2)              | x                                    | 187.5 (0.5) | x                                    | 186.2 (0.7) | x                                    | 188.6 (0.3) |
| C1                   | 193.03            | 96.01  | x                                    | x                        | x                                    | x           | x                                    | x           | x                                    | x           |
| C2                   | 476.07            | 237.53 | 122.5 (0.2)                          | x                        | 122.3 (0.2)                          | x           | 122.6 (0.3)                          | x           | 122.2 (0.2)                          | x           |
| C3                   | 652.10            | 325.55 | x                                    | x                        | x                                    | x           | x                                    | x           | x                                    | x           |
| C4                   | 935.14            | 467.07 | x                                    | x                        | x                                    | x           | x                                    | x           | x                                    | x           |
| Z0                   | 84.08             | 41.54  | x                                    | x                        | x                                    | x           | x                                    | x           | x                                    | x           |
| Z1                   | 367.12            | 183.05 | 116.7 (0.2)                          | x                        | 117.4 (0.3)                          | x           | 117.3 (0.2)                          | x           | 116.9 (0.3)                          | x           |
| Z2                   | 543.15            | 271.07 | x                                    | x                        | x                                    | x           | x                                    | x           | x                                    | x           |
| Z3                   | 826.19            | 412.59 | x                                    | x                        | x                                    | x           | x                                    | x           | x                                    | x           |

102 <sup>1</sup> Columns represent different charge states.

103 <sup>2</sup> Each CCS is an average of independent measurements with the corresponding standard deviation

104 **Supplementary Table 4.** CCS of B, Y, C and Z ions identified in isomeric tetra-saccharide UA-GlcNS6S-UA-GlcNS6S-R<sub>1</sub> structures, where R<sub>1</sub> is  
 105 (CH<sub>2</sub>)<sub>5</sub>NH<sub>2</sub>.

|                      |         |        |        | #12                                |                          |             | #14                                |             |             |
|----------------------|---------|--------|--------|------------------------------------|--------------------------|-------------|------------------------------------|-------------|-------------|
|                      |         |        |        | G-GlcNS6S-I-GlcNS6S-R <sub>1</sub> |                          |             | I-GlcNS6S-G-GlcNS6S-R <sub>1</sub> |             |             |
| [M-2H] <sup>2-</sup> |         |        |        | 547.55                             | 200.1 (0.9) <sup>2</sup> |             | 547.55                             | 201.5 (0.8) |             |
| [M-3H] <sup>3-</sup> |         |        |        | 364.7                              | 236.2 (0.2)              |             | 364.7                              | 234.0 (0.1) |             |
|                      | (1-)    | (2-)   | (3-)   | (1-) <sup>1</sup>                  | (2-)                     | (3-)        | (1-)                               | (2-)        | (3-)        |
| B1                   | 175.02  | 87.01  | 57.67  | 68.9 (0.2)                         | x                        | x           | 69.0 (0.4)                         | x           | x           |
| B2                   | 496.01  | 247.50 | 164.66 | x                                  | 134.5 (0.6)              | x           | x                                  | 133.8 (0.3) | x           |
| B3                   | 672.04  | 335.52 | 223.34 | x                                  | 160.2 (0.2)              | x           | x                                  | 165.5 (0.2) | x           |
| B4                   | 993.02  | 496.01 | 330.34 | x                                  | x                        | 225.7 (0.2) | x                                  | x           | 226.1 (0.2) |
| Y0                   | 102.09  | 50.54  | 33.46  | x                                  | x                        | x           | x                                  | x           | x           |
| Y1                   | 423.07  | 211.03 | 140.35 | 112.5 (0.3)                        | x                        | x           | 112.1 (0.1)                        | x           | x           |
| Y2                   | 599.11  | 299.05 | 199.03 | x                                  | 162.2 (0.5)              | x           | x                                  | 156.5 (0.5) | x           |
| Y3                   | 920.09  | 459.54 | 306.02 | x                                  | x                        | x           | x                                  | x           | 212.6 (0.6) |
| C1                   | 193.03  | 96.01  | 63.67  | x                                  | x                        | x           | x                                  | x           | x           |
| C2                   | 514.02  | 256.50 | 170.67 | x                                  | x                        | x           | x                                  | x           | x           |
| C3                   | 690.05  | 344.52 | 229.34 | x                                  | x                        | x           | x                                  | 165.6 (0.1) | x           |
| C4                   | 1011.03 | 505.01 | 336.34 | x                                  | x                        | x           | x                                  | x           | x           |
| Z0                   | 84.08   | 41.54  | 27.36  | x                                  | x                        | x           | x                                  | x           | x           |
| Z1                   | 405.06  | 202.03 | 134.35 | x                                  | x                        | x           | x                                  | x           | x           |
| Z2                   | 581.10  | 290.04 | 193.03 | x                                  | x                        | x           | x                                  | x           | x           |
| Z3                   | 902.08  | 450.54 | 300.02 | x                                  | x                        | x           | x                                  | x           | x           |

106 <sup>1</sup> Columns represent different charge states.

107 <sup>2</sup> Each CCS is an average of independent measurements with the corresponding standard deviation

108 **Supplementary Table 5.** CCS of B, Y, C and Z ions identified in a tetra-saccharide structure ( $R_1$  is  
 109  $(CH_2)_5NH_2$ ).

| #15                          |                   |                          |        |             |             |             |
|------------------------------|-------------------|--------------------------|--------|-------------|-------------|-------------|
| G-GlcNS6S-I2S-GlcNS6S- $R_1$ |                   |                          |        |             |             |             |
| $[M-2H]^{2-}$                | 587.53            | 203.9 (0.5) <sup>2</sup> |        |             |             |             |
| $[M-3H]^{3-}$                | 391.35            | 238.8 (0.5)              |        |             |             |             |
|                              | (1-) <sup>1</sup> | (2-)                     | (3-)   | (1-)        | (2-)        | (3-)        |
| B1                           | 175.02            | 87.01                    | 57.67  | x           | x           | x           |
| B2                           | 496.01            | 247.50                   | 164.66 | x           | 135.2 (0.5) | x           |
| B3                           | 752.00            | 375.49                   | 249.99 | x           | x           | x           |
| B4                           | 1072.98           | 535.99                   | 356.99 | x           | x           | 229.0 (0.4) |
| Y0                           | 102.09            | 50.54                    | 33.36  | x           | x           | x           |
| Y1                           | 423.07            | 211.03                   | 140.35 | 112.8 (0.3) | x           | x           |
| Y2                           | 679.06            | 339.03                   | 225.68 | x           | x           | x           |
| Y3                           | 1000.05           | 499.52                   | 332.68 | x           | x           | x           |
| C1                           | 193.03            | 96.01                    | 63.67  | x           | x           | x           |
| C2                           | 514.02            | 256.50                   | 170.67 | x           | x           | x           |
| C3                           | 770.01            | 384.50                   | 256.00 | x           | x           | x           |
| C4                           | 1090.99           | 544.99                   | 362.99 | x           | x           | x           |
| Z0                           | 84.08             | 41.54                    | 27.36  | x           | x           | x           |
| Z1                           | 405.06            | 202.03                   | 134.35 | x           | x           | x           |
| Z2                           | 661.05            | 330.02                   | 219.68 | x           | x           | x           |
| Z3                           | 982.03            | 490.51                   | 326.67 | x           | x           | x           |

110 <sup>1</sup> Columns represent different charge states.

111 <sup>2</sup> Each CCS is an average of independent measurements with the corresponding standard deviation

112

113



114 **Supplementary Table 6.** CCS of B, Y, C and Z ions identified in a hexa-saccharide structure (R<sub>1</sub> is (CH<sub>2</sub>)<sub>5</sub>NH<sub>2</sub>).

115

| #16                                          |                   |                          |        |        |      |             |             |             |
|----------------------------------------------|-------------------|--------------------------|--------|--------|------|-------------|-------------|-------------|
| G-GlcNS6S-I-GlcNS6S-G-GlcNS6S-R <sub>1</sub> |                   |                          |        |        |      |             |             |             |
| [M-2H] <sup>2-</sup>                         | 796.06            | 255.6 (0.9) <sup>2</sup> |        |        |      |             |             |             |
| [M-3H] <sup>3-</sup>                         | 530.37            | 258.8 (0.8)              |        |        |      |             |             |             |
|                                              | (1-) <sup>1</sup> | (2-)                     | (3-)   | (4-)   | (1-) | (2-)        | (3-)        | (4-)        |
| B1                                           | 175.02            | 87.01                    | 57.67  | 43.00  | x    | x           | x           | x           |
| B2                                           | 496.01            | 247.50                   | 164.66 | 123.25 | x    | 134.6 (0.4) | x           | x           |
| B3                                           | 672.04            | 335.52                   | 223.34 | 167.25 | x    | 160.3 (0.2) | x           | x           |
| B4                                           | 993.02            | 496.01                   | 330.34 | 247.50 | x    | x           | 226.1 (0.2) | x           |
| B5                                           | 1169.05           | 584.02                   | 389.01 | 291.51 | x    | x           | 249.4 (0.8) | 275.9 (0.7) |
| B6                                           | 1490.04           | 744.51                   | 496.01 | 371.75 | x    | x           | x           | x           |
| Y0                                           | 102.09            | 50.54                    | 33.36  | 24.77  | x    | x           | x           | x           |
| Y1                                           | 423.07            | 211.03                   | 140.35 | 105.01 | x    | 130.0 (0.7) | x           | x           |
| Y2                                           | 599.11            | 299.05                   | 199.03 | 149.02 | x    | 156.4 (0.5) | x           | x           |
| Y3                                           | 920.09            | 459.54                   | 306.02 | 229.27 | x    | x           | 213.1 (0.7) | x           |
| Y4                                           | 1096.12           | 547.56                   | 364.70 | 273.27 | x    | x           | 233.2 (0.6) | x           |
| Y5                                           | 1417.10           | 708.05                   | 471.70 | 353.52 | x    | x           | x           | 324.5 (0.2) |
| C1                                           | 193.03            | 96.01                    | 63.67  | 47.50  | x    | x           | x           | x           |
| C2                                           | 514.02            | 256.50                   | 170.67 | 127.75 | x    | x           | x           | x           |
| C3                                           | 690.05            | 344.52                   | 229.34 | 171.76 | x    | x           | x           | x           |
| C4                                           | 1011.03           | 505.01                   | 336.34 | 252.00 | x    | x           | x           | x           |
| C5                                           | 1187.06           | 593.03                   | 395.02 | 296.01 | x    | x           | x           | x           |
| C6                                           | 1508.05           | 753.52                   | 502.01 | 376.26 | x    | x           | x           | x           |
| Z0                                           | 84.08             | 41.54                    | 27.36  | 20.26  | x    | x           | x           | x           |
| Z1                                           | 405.06            | 202.03                   | 134.35 | 100.51 | x    | x           | x           | x           |
| Z2                                           | 581.10            | 290.04                   | 193.03 | 144.52 | x    | x           | x           | x           |
| Z3                                           | 902.08            | 450.54                   | 300.02 | 224.76 | x    | x           | x           | x           |

|    |         |        |        |        |   |   |   |   |
|----|---------|--------|--------|--------|---|---|---|---|
| Z4 | 1078.11 | 538.55 | 358.70 | 268.77 | x | x | x | x |
| Z5 | 1399.09 | 699.04 | 465.69 | 349.02 | x | x | x | x |

116

117 <sup>1</sup> Columns represent different charge states.

118 <sup>2</sup> Each CCS is an average of independent measurements with the corresponding standard deviation

119

120  
121  
122

**Supplementary Table 7.** CCS of B, Y, C and Z ions identified in a hexa-saccharide GlcNAc6S-[G-GlcNAc6S]<sub>2</sub>-G-R<sub>2</sub> structure, where R<sup>2</sup> is C<sub>7</sub>H<sub>7</sub>O.

| #17                                                  |                   |                          |        |             |             |             |
|------------------------------------------------------|-------------------|--------------------------|--------|-------------|-------------|-------------|
| GlcNAc6S-[G-GlcNAc6S] <sub>2</sub> -G-R <sub>2</sub> |                   |                          |        |             |             |             |
| [M-3H] <sup>3-</sup>                                 | 499.41            | 296.5 (0.4) <sup>2</sup> |        |             |             |             |
| [M-4H] <sup>4-</sup>                                 | 374.3             | 347.4 (0.2)              |        |             |             |             |
|                                                      | (1-) <sup>1</sup> | (2-)                     | (3-)   | (1-)        | (2-)        | (3-)        |
| B1                                                   | 282.03            | 140.51                   | 93.34  | 93.0 (0.2)  | x           | x           |
| B2                                                   | 458.06            | 228.53                   | 152.01 | 120.8 (0.2) | 135.1 (0.5) | x           |
| B3                                                   | 741.1             | 370.04                   | 246.36 | x           | 169.7 (0.6) | x           |
| B4                                                   | 917.13            | 458.06                   | 305.04 | x           | x           | 225.6 (0.8) |
| B5                                                   | 1200.16           | 599.58                   | 399.38 | x           | x           | 270.4 (0.2) |
| B6                                                   | 1376.2            | 687.59                   | 458.06 | x           | x           | 291.3 (0.7) |
| Y0                                                   | 122.04            | 60.51                    | 40.01  | x           | x           | x           |
| Y1                                                   | 299.08            | 149.03                   | 99.02  | 105.4 (0.7) | x           | x           |
| Y2                                                   | 582.11            | 290.55                   | 193.37 | 154.4 (0.4) | 166.0 (0.4) | x           |
| Y3                                                   | 758.14            | 378.57                   | 252.04 | x           | x           | x           |
| Y4                                                   | 1041.18           | 520.09                   | 346.39 | x           | x           | 255.8 (0.5) |
| Y5                                                   | 1217.21           | 608.1                    | 405.07 | x           | x           | x           |
| C1                                                   | 300.04            | 149.52                   | 99.34  | 94.4 (0.2)  | x           | x           |
| C2                                                   | 476.07            | 237.53                   | 158.02 | 122.3 (0.4) | x           | x           |
| C3                                                   | 759.11            | 379.05                   | 252.36 | x           | x           | 200.1 (0.9) |
| C4                                                   | 935.14            | 467.07                   | 311.04 | x           | 185.2 (0.6) | x           |
| C5                                                   | 1218.18           | 608.58                   | 405.39 | x           | x           | 273.9 (0.1) |
| C6                                                   | 1394.21           | 696.6                    | 464.06 | x           | x           | x           |
| Z0                                                   | 105.03            | 52.01                    | 34.34  | x           | x           | x           |
| Z1                                                   | 281.07            | 140.03                   | 93.02  | x           | x           | x           |
| Z2                                                   | 564.1             | 281.55                   | 187.36 | x           | x           | x           |
| Z3                                                   | 740.13            | 369.56                   | 246.04 | x           | x           | x           |
| Z4                                                   | 1023.17           | 511.08                   | 340.38 | x           | x           | x           |
| Z5                                                   | 1199.2            | 599.1                    | 399.06 | x           | x           | x           |

123

124 <sup>1</sup> Columns represent different charge states.

125 <sup>2</sup> Each CCS is an average of independent measurements with the corresponding standard deviation

126

127

128

129  
130  
131

**Supplementary Table 8.** CCS of B, Y, C and Z ions identified in a hexa-saccharide GlcNAc6S-[I-GlcNAc6S]<sub>2</sub>-I-R<sub>2</sub> structure, where R<sub>2</sub> is C<sub>7</sub>H<sub>7</sub>O.

| #18                                                  |                   |                          |        |                   |              |              |
|------------------------------------------------------|-------------------|--------------------------|--------|-------------------|--------------|--------------|
| GlcNAc6S-[I-GlcNAc6S] <sub>2</sub> -I-R <sub>2</sub> |                   |                          |        |                   |              |              |
| [M-3H] <sup>3-</sup>                                 | 499.41            | 291.8 (0.7) <sup>2</sup> |        |                   |              |              |
| [M-4H] <sup>4-</sup>                                 | 374.3             | 342.2 (0.3)              |        |                   |              |              |
|                                                      | (1-) <sup>1</sup> | (2-)                     | (3-)   | (1-) <sup>1</sup> | (2-)         | (3-)         |
| B1                                                   | 282.03            | 140.51                   | 93.34  | 92.9 (0.2)        | x            | x            |
| B2                                                   | 458.06            | 228.53                   | 152.01 | 122.6 (0.4)       | x            | x            |
| B3                                                   | 741.10            | 370.04                   | 246.36 | x                 | 176.0 (0.8)  | x            |
| B4                                                   | 917.13            | 458.06                   | 305.04 | x                 | 197.1 (0.17) | x            |
| B5                                                   | 1200.16           | 599.58                   | 399.38 | x                 | x            | 269.2 (0.8)  |
| B6                                                   | 1376.20           | 687.59                   | 458.06 | x                 | x            | 294.1 (0.16) |
| Y0                                                   | 122.04            | 60.51                    | 40.01  | x                 | x            | x            |
| Y1                                                   | 299.08            | 149.03                   | 99.02  | 103.7 (0.1)       | x            | x            |
| Y2                                                   | 582.11            | 290.55                   | 193.37 | 153.9 (0.6)       | 166.3 (0.3)  | x            |
| Y3                                                   | 758.14            | 378.57                   | 252.04 | x                 | x            | x            |
| Y4                                                   | 1041.18           | 520.09                   | 346.39 | x                 | x            | x            |
| Y5                                                   | 1217.21           | 608.10                   | 405.07 | x                 | 229.9 (0.1)  | x            |
| C1                                                   | 300.04            | 149.52                   | 99.34  | 94.1 (0.2)        | x            | x            |
| C2                                                   | 476.07            | 237.53                   | 158.02 | 122.6 (0.3)       | x            | x            |
| C3                                                   | 759.11            | 379.05                   | 252.36 | x                 | x            | x            |
| C4                                                   | 935.14            | 467.07                   | 311.04 | x                 | x            | x            |
| C5                                                   | 1218.18           | 608.58                   | 405.39 | x                 | x            | x            |
| C6                                                   | 1394.21           | 696.60                   | 464.06 | x                 | x            | x            |
| Z0                                                   | 105.03            | 52.01                    | 34.34  | x                 | x            | x            |
| Z1                                                   | 281.07            | 140.03                   | 93.02  | x                 | x            | x            |
| Z2                                                   | 564.10            | 281.55                   | 187.36 | x                 | x            | x            |
| Z3                                                   | 740.13            | 369.56                   | 246.04 | x                 | x            | x            |
| Z4                                                   | 1023.17           | 511.08                   | 340.38 | x                 | x            | x            |
| Z5                                                   | 1199.20           | 599.10                   | 399.06 | x                 | x            | x            |

132 <sup>1</sup> Columns represent different charge states.

133 <sup>2</sup> Each CCS is an average of independent measurements with the corresponding standard deviation

134

135

136

137  
138

**Supplementary Table 9.** CCS of B, Y, C and Z ions identified in an octa-saccharide GlcNAc6S-[I-GlcNAc6S]<sub>3</sub>-I-R<sub>2</sub> structure, where R<sub>2</sub> is C<sub>7</sub>H<sub>7</sub>O.

| #19                                                  |                   |                                       |        |        |             |             |             |             |
|------------------------------------------------------|-------------------|---------------------------------------|--------|--------|-------------|-------------|-------------|-------------|
| GlcNAc6S-[I-GlcNAc6S] <sub>3</sub> -I-R <sub>2</sub> |                   |                                       |        |        |             |             |             |             |
| [M-4H] <sup>4-</sup>                                 | 489.07            | 379.8 (0.7) <sup>2</sup> /416.0 (0.2) |        |        |             |             |             |             |
| [M-5H] <sup>5-</sup>                                 | 391.05            | 433.8 (0.5)                           |        |        |             |             |             |             |
| [M-6H] <sup>6-</sup>                                 | 325.7             | 449.4 (0.6)                           |        |        |             |             |             |             |
|                                                      | (1-) <sup>1</sup> | (2-)                                  | (3-)   | (4-)   | (1-)        | (2-)        | (3-)        | (4-)        |
| B1                                                   | 282.03            | 140.51                                | 93.34  | 69.75  | 93.3 (0.3)  | x           | x           | x           |
| B2                                                   | 458.06            | 228.53                                | 152.01 | 113.76 | 122.0 (0.6) | x           | x           | x           |
| B3                                                   | 741.10            | 370.04                                | 246.36 | 184.52 | x           | 176.3 (0.8) | x           | x           |
| B4                                                   | 917.13            | 458.06                                | 305.04 | 228.53 | x           | 197.2 (0.7) | x           | x           |
| B5                                                   | 1200.16           | 599.58                                | 399.38 | 299.29 | x           | x           | 270.0 (0.3) | x           |
| B6                                                   | 1376.20           | 687.59                                | 458.06 | 343.29 | x           | x           | 294.4 (0.7) | x           |
| B7                                                   | 1659.23           | 829.11                                | 552.41 | 414.05 | x           | x           | x           | x           |
| B8                                                   | 1835.27           | 917.13                                | 611.08 | 458.06 | x           | x           | x           | 394.0 (0.6) |
| Y0                                                   | 122.04            | 60.51                                 | 40.01  | 29.75  | x           | x           | x           | x           |
| Y1                                                   | 299.08            | 149.03                                | 99.02  | 74.01  | x           | x           | x           | x           |
| Y2                                                   | 582.11            | 290.55                                | 193.37 | 144.77 | x           | 166.0 (0.6) | x           | x           |
| Y3                                                   | 758.14            | 378.57                                | 252.04 | 188.78 | x           | x           | x           | x           |
| Y4                                                   | 1041.18           | 520.09                                | 346.39 | 259.54 | x           | x           | x           | x           |
| Y5                                                   | 1217.21           | 608.10                                | 405.07 | 303.55 | x           | 229.2 (0.2) | x           | x           |
| Y6                                                   | 1500.25           | 749.62                                | 499.41 | 374.31 | x           | 290.5 (0.5) | x           | x           |
| Y7                                                   | 1676.28           | 837.64                                | 558.09 | 418.31 | x           | x           | x           | x           |
| C1                                                   | 300.04            | 149.52                                | 99.34  | 74.25  | 94.0 (0.7)  | x           | x           | x           |
| C2                                                   | 476.07            | 237.53                                | 158.02 | 118.26 | 122.8 (0.5) | x           | x           | x           |
| C3                                                   | 759.11            | 379.05                                | 252.36 | 189.02 | x           | x           | x           | x           |
| C4                                                   | 935.14            | 467.07                                | 311.04 | 233.03 | x           | x           | x           | x           |

|    |         |        |        |        |   |   |   |   |
|----|---------|--------|--------|--------|---|---|---|---|
| C5 | 1218.18 | 608.58 | 405.39 | 303.79 | x | x | x | x |
| C6 | 1394.21 | 696.60 | 464.06 | 347.80 | x | x | x | x |
| C7 | 1677.24 | 838.12 | 558.41 | 418.56 | x | x | x | x |
| C8 | 1853.28 | 926.13 | 617.09 | 462.56 | x | x | x | x |
| Z0 | 105.03  | 52.01  | 34.34  | 25.50  | x | x | x | x |
| Z1 | 281.07  | 140.03 | 93.02  | 69.51  | x | x | x | x |
| Z2 | 564.10  | 281.55 | 187.36 | 140.27 | x | x | x | x |
| Z3 | 740.13  | 369.56 | 246.04 | 184.28 | x | x | x | x |
| Z4 | 1023.17 | 511.08 | 340.38 | 255.04 | x | x | x | x |
| Z5 | 1199.20 | 599.10 | 399.06 | 299.04 | x | x | x | x |
| Z6 | 1482.24 | 740.62 | 493.41 | 369.80 | x | x | x | x |
| Z7 | 1658.27 | 828.63 | 552.09 | 413.81 | x | x | x | x |

139

140 <sup>1</sup> Columns represent different charge states.

141 <sup>2</sup> Each CCS is an average of independent measurements with the corresponding standard deviation

142

143

144 **Supplementary Table 10.** CCS of B, Y, C and Z ions identified in an octa-saccharide GlcNAc6S-[G-GlcNAc6S]<sub>3</sub>-G-R<sub>2</sub> structure, where R<sub>2</sub> is C<sub>7</sub>H<sub>7</sub>O.

| #20                                                  |                   |                          |        |        |                   |             |             |             |
|------------------------------------------------------|-------------------|--------------------------|--------|--------|-------------------|-------------|-------------|-------------|
| GlcNAc6S-[G-GlcNAc6S] <sub>3</sub> -G-R <sub>2</sub> |                   |                          |        |        |                   |             |             |             |
| [M-4H] <sup>4+</sup>                                 | 489.07            | 391.4 (0.8) <sup>2</sup> |        |        |                   |             |             |             |
| [M-5H] <sup>5+</sup>                                 | 391.05            | 442.9 (0.2)              |        |        |                   |             |             |             |
| [M-6H] <sup>6+</sup>                                 | 325.7             | 456.7 (0.8)              |        |        |                   |             |             |             |
|                                                      | (1-) <sup>1</sup> | (2-)                     | (3-)   | (4-)   | (1-) <sup>1</sup> | (2-)        | (3-)        | (4-)        |
| B1                                                   | 282.03            | 140.51                   | 93.34  | 69.75  | 93.4 (0.1)        | x           | x           | x           |
| B2                                                   | 458.06            | 228.53                   | 152.01 | 113.76 | 121.6 (0.5)       | x           | x           | x           |
| B3                                                   | 741.10            | 370.04                   | 246.36 | 184.52 | x                 | 169.9 (0.4) |             | x           |
| B4                                                   | 917.13            | 458.06                   | 305.04 | 228.53 | x                 | 194.1 (0.3) | 225.8 (0.8) | x           |
| B5                                                   | 1200.16           | 599.58                   | 399.38 | 299.29 | x                 | x           | 270.5 (0.2) | x           |
| B6                                                   | 1376.20           | 687.59                   | 458.06 | 343.29 | x                 | x           | x           | x           |
| B7                                                   | 1659.23           | 829.11                   | 552.41 | 414.05 | x                 | x           | 291.0 (0.1) | 322.1 (0.2) |
| B8                                                   | 1835.27           | 917.13                   | 611.08 | 458.06 | x                 | x           | x           | 391.8 (0.1) |
| Y0                                                   | 122.04            | 60.51                    | 40.01  | 29.75  | x                 | x           | x           | x           |
| Y1                                                   | 299.08            | 149.03                   | 99.02  | 74.01  | x                 | x           | x           | x           |
| Y2                                                   | 582.11            | 290.55                   | 193.37 | 144.77 | 154.3 (0.5)       | 165.8 (0.7) | x           | x           |
| Y3                                                   | 758.14            | 378.57                   | 252.04 | 188.78 | x                 | x           | x           | x           |
| Y4                                                   | 1041.18           | 520.09                   | 346.39 | 259.54 | x                 | x           | 255.1 (0.8) | x           |
| Y5                                                   | 1217.21           | 608.10                   | 405.07 | 303.55 | x                 | x           | x           | x           |
| Y6                                                   | 1500.25           | 749.62                   | 499.41 | 374.31 | x                 | x           | x           | x           |
| Y7                                                   | 1676.28           | 837.64                   | 558.09 | 418.31 | x                 | x           | x           | x           |
| C1                                                   | 300.04            | 149.52                   | 99.34  | 74.25  | 94.6 (0.4)        | x           | x           | x           |
| C2                                                   | 476.07            | 237.53                   | 158.02 | 118.26 | 122.2 (0.4)       | x           | x           | x           |
| C3                                                   | 759.11            | 379.05                   | 252.36 | 189.02 | x                 | 167.5 (0.1) | x           | x           |
| C4                                                   | 935.14            | 467.07                   | 311.04 | 233.03 | x                 | x           | x           | x           |
| C5                                                   | 1218.18           | 608.58                   | 405.39 | 303.79 | x                 | x           | x           | x           |

|    |         |        |        |        |   |   |              |   |
|----|---------|--------|--------|--------|---|---|--------------|---|
| C6 | 1394.21 | 696.60 | 464.06 | 347.80 | x | x | 309.1 (0.87) | x |
| C7 | 1677.24 | 838.12 | 558.41 | 418.56 | x | x | x            | x |
| C8 | 1853.28 | 926.13 | 617.09 | 462.56 | x | x | x            | x |
| Z0 | 105.03  | 52.01  | 34.34  | 25.50  | x | x | x            | x |
| Z1 | 281.07  | 140.03 | 93.02  | 69.51  | x | x | x            | x |
| Z2 | 564.10  | 281.55 | 187.36 | 140.27 | x | x | x            | x |
| Z3 | 740.13  | 369.56 | 246.04 | 184.28 | x | x | x            | x |
| Z4 | 1023.17 | 511.08 | 340.38 | 255.04 | x | x | x            | x |
| Z5 | 1199.20 | 599.10 | 399.06 | 299.04 | x | x | x            | x |
| Z6 | 1482.24 | 740.62 | 493.41 | 369.80 | x | x | x            | x |
| Z7 | 1658.27 | 828.63 | 552.09 | 413.81 | x | x | x            | x |

145

146 <sup>1</sup> Columns represent different charge states.

147 <sup>2</sup> Each CCS is an average of independent measurements with the corresponding standard deviation

148

149



150 **Supplementary Table 11.** CCS of B, Y, C and Z ions identified in an octa-saccharide GlcNAc6S-G-GlcNAc6S-G-GlcNAc6S-I-GlcNAc6S-I-R<sub>2</sub> structure,  
 151 where R<sub>2</sub> is C<sub>7</sub>H<sub>7</sub>O.

| #21                                                        |                   |                          |        |        |             |      |             |             |
|------------------------------------------------------------|-------------------|--------------------------|--------|--------|-------------|------|-------------|-------------|
| GlcNAc6S-G-GlcNAc6S-G-GlcNAc6S-I-GlcNAc6S-I-R <sub>2</sub> |                   |                          |        |        |             |      |             |             |
| [M-4H] <sup>4-</sup>                                       | 489.07            | 379.2 (0.8) <sup>2</sup> |        |        |             |      |             |             |
| [M-5H] <sup>5-</sup>                                       | 391.05            | 438.5 (0.5)              |        |        |             |      |             |             |
| [M-6H] <sup>6-</sup>                                       | 325.7             | 452.4 (0.8)              |        |        |             |      |             |             |
|                                                            | (1-) <sup>1</sup> | (2-)                     | (3-)   | (4-)   | (1-)        | (2-) | (3-)        | (4-)        |
| B1                                                         | 282.03            | 140.51                   | 93.34  | 69.75  | 92.6 (0.5)  | x    | x           | x           |
| B2                                                         | 458.06            | 228.53                   | 152.01 | 113.76 | 121.4 (0.2) | x    | x           | x           |
| B3                                                         | 741.10            | 370.04                   | 246.36 | 184.52 | x           | x    | x           | x           |
| B4                                                         | 917.13            | 458.06                   | 305.04 | 228.53 | x           | x    | 224.8 (0.4) | x           |
| B5                                                         | 1200.16           | 599.58                   | 399.38 | 299.29 | x           | x    | 270.1 (0.4) | x           |
| B6                                                         | 1376.20           | 687.59                   | 458.06 | 343.29 | x           | x    | x           | 322.3 (0.2) |
| B7                                                         | 1659.23           | 829.11                   | 552.41 | 414.05 | x           | x    | x           | 367.3 (0.4) |
| B8                                                         | 1835.27           | 917.13                   | 611.08 | 458.06 | x           | x    | x           | x           |
| Y0                                                         | 122.04            | 60.51                    | 40.01  | 29.75  | x           | x    | x           | x           |
| Y1                                                         | 299.08            | 149.03                   | 99.02  | 74.01  | 103.4 (0.5) | x    | x           | x           |
| Y2                                                         | 582.11            | 290.55                   | 193.37 | 144.77 | 153.8 (0.5) | x    | x           | x           |
| Y3                                                         | 758.14            | 378.57                   | 252.04 | 188.78 | x           | x    | x           | x           |
| Y4                                                         | 1041.18           | 520.09                   | 346.39 | 259.54 | x           | x    | 255.4 (0.6) | x           |
| Y5                                                         | 1217.21           | 608.10                   | 405.07 | 303.55 | x           | x    | x           | x           |
| Y6                                                         | 1500.25           | 749.62                   | 499.41 | 374.31 | x           | x    | 284.7 (0.6) | 346.4 (0.7) |
| Y7                                                         | 1676.28           | 837.64                   | 558.09 | 418.31 | x           | x    | x           | x           |
| C1                                                         | 300.04            | 149.52                   | 99.34  | 74.25  | 94.4 (0.3)  | x    | x           | x           |
| C2                                                         | 476.07            | 237.53                   | 158.02 | 118.26 | 122.4 (0.8) | x    | x           | x           |
| C3                                                         | 759.11            | 379.05                   | 252.36 | 189.02 | x           | x    | x           | x           |
| C4                                                         | 935.14            | 467.07                   | 311.04 | 233.03 | x           | x    | x           | x           |

|    |         |        |        |        |   |   |   |   |
|----|---------|--------|--------|--------|---|---|---|---|
| C5 | 1218.18 | 608.58 | 405.39 | 303.79 | x | x | x | x |
| C6 | 1394.21 | 696.60 | 464.06 | 347.80 | x | x | x | x |
| C7 | 1677.24 | 838.12 | 558.41 | 418.56 | x | x | x | x |
| C8 | 1853.28 | 926.13 | 617.09 | 462.56 | x | x | x | x |
|    |         |        |        |        |   |   |   |   |
| Z0 | 105.03  | 52.01  | 34.34  | 25.50  | x | x | x | x |
| Z1 | 281.07  | 140.03 | 93.02  | 69.51  | x | x | x | x |
| Z2 | 564.10  | 281.55 | 187.36 | 140.27 | x | x | x | x |
| Z3 | 740.13  | 369.56 | 246.04 | 184.28 | x | x | x | x |
| Z4 | 1023.17 | 511.08 | 340.38 | 255.04 | x | x | x | x |
| Z5 | 1199.20 | 599.10 | 399.06 | 299.04 | x | x | x | x |
| Z6 | 1482.24 | 740.62 | 493.41 | 369.80 | x | x | x | x |
| Z7 | 1658.27 | 828.63 | 552.09 | 413.81 | x | x | x | x |

152

153 <sup>1</sup> Columns represent different charge states.

154 <sup>2</sup> Each CCS is an average of independent measurements with the corresponding standard deviation

155

156

157  
158

**Supplementary Table 12.** CCS of B, Y, C and Z ions identified in an octa-saccharide GlcNAc6S-G- GlcNAc6S-I-GlcNAc6S-I-GlcNAc6S-G-R<sub>2</sub> structure, where R<sub>2</sub> is C<sub>7</sub>H<sub>7</sub>O.

| #22                                                        |                   |                          |        |        |             |      |              |             |
|------------------------------------------------------------|-------------------|--------------------------|--------|--------|-------------|------|--------------|-------------|
| GlcNAc6S-G-GlcNAc6S-I-GlcNAc6S-I-GlcNAc6S-G-R <sub>2</sub> |                   |                          |        |        |             |      |              |             |
| [M-4H] <sup>4+</sup>                                       | 489.07            | 396.5 (0.7) <sup>2</sup> |        |        |             |      |              |             |
| [M-5H] <sup>5-</sup>                                       | 391.05            | 440.8 (0.5)              |        |        |             |      |              |             |
| [M-6H] <sup>6-</sup>                                       | 325.7             | 461.3 (0.7)              |        |        |             |      |              |             |
|                                                            | (1-) <sup>1</sup> | (2-)                     | (3-)   | (4-)   | (1-)        | (2-) | (3-)         | (4-)        |
| B1                                                         | 282.03            | 140.51                   | 93.34  | 69.75  | 93.0 (0.2)  | x    | x            | x           |
| B2                                                         | 458.06            | 228.53                   | 152.01 | 113.76 | 121.6 (0.3) | x    | x            | x           |
| B3                                                         | 741.10            | 370.04                   | 246.36 | 184.52 | x           | x    | x            | x           |
| B4                                                         | 917.13            | 458.06                   | 305.04 | 228.53 | x           | x    | x            | x           |
| B5                                                         | 1200.16           | 599.58                   | 399.38 | 299.29 | x           | x    | 272.8 (0.6)  | x           |
| B6                                                         | 1376.20           | 687.59                   | 458.06 | 343.29 | x           | x    | x            | 323.2 (0.2) |
| B7                                                         | 1659.23           | 829.11                   | 552.41 | 414.05 | x           | x    | x            | x           |
| B8                                                         | 1835.27           | 917.13                   | 611.08 | 458.06 | x           | x    | x            | x           |
| Y0                                                         | 122.04            | 60.51                    | 40.01  | 29.75  | x           | x    | x            | x           |
| Y1                                                         | 299.08            | 149.03                   | 99.02  | 74.01  | x           | x    | x            | x           |
| Y2                                                         | 582.11            | 290.55                   | 193.37 | 144.77 | 154.9 (0.3) | x    | x            | x           |
| Y3                                                         | 758.14            | 378.57                   | 252.04 | 188.78 | x           | x    | x            | x           |
| Y4                                                         | 1041.18           | 520.09                   | 346.39 | 259.54 | x           | x    | 254.1 (0.28) | x           |
| Y5                                                         | 1217.21           | 608.10                   | 405.07 | 303.55 | x           | x    | x            | 300.6 (0.2) |
| Y6                                                         | 1500.25           | 749.62                   | 499.41 | 374.31 | x           | x    | 289.1 (0.6)  | x           |
| Y7                                                         | 1676.28           | 837.64                   | 558.09 | 418.31 | x           | x    | x            | x           |
| C1                                                         | 300.04            | 149.52                   | 99.34  | 74.25  | 94.1 (0.3)  | x    | x            | x           |
| C2                                                         | 476.07            | 237.53                   | 158.02 | 118.26 | 123.0 (0.4) | x    | x            | x           |
| C3                                                         | 759.11            | 379.05                   | 252.36 | 189.02 | x           | x    | x            | x           |
| C4                                                         | 935.14            | 467.07                   | 311.04 | 233.03 | x           | x    | x            | x           |

|    |         |        |        |        |   |   |   |             |
|----|---------|--------|--------|--------|---|---|---|-------------|
| C5 | 1218.18 | 608.58 | 405.39 | 303.79 | x | x | x | x           |
| C6 | 1394.21 | 696.60 | 464.06 | 347.80 | x | x | x | x           |
| C7 | 1677.24 | 838.12 | 558.41 | 418.56 | x | x | x | 371.4 (0.5) |
| C8 | 1853.28 | 926.13 | 617.09 | 462.56 | x | x | x | x           |
|    |         |        |        |        |   |   |   |             |
| Z0 | 105.03  | 52.01  | 34.34  | 25.50  | x | x | x | x           |
| Z1 | 281.07  | 140.03 | 93.02  | 69.51  | x | x | x | x           |
| Z2 | 564.10  | 281.55 | 187.36 | 140.27 | x | x | x | x           |
| Z3 | 740.13  | 369.56 | 246.04 | 184.28 | x | x | x | x           |
| Z4 | 1023.17 | 511.08 | 340.38 | 255.04 | x | x | x | x           |
| Z5 | 1199.20 | 599.10 | 399.06 | 299.04 | x | x | x | x           |
| Z6 | 1482.24 | 740.62 | 493.41 | 369.80 | x | x | x | x           |
| Z7 | 1658.27 | 828.63 | 552.09 | 413.81 | x | x | x | x           |

159

160 <sup>1</sup> Columns represent different charge states.

161 <sup>2</sup> Each CCS is an average of independent measurements with the corresponding standard deviation

162

163

164

165

166

167  
168

**Supplementary Table 13.** CCS of B, Y, C and Z ions identified in an octa-saccharide GlcNAc6S-I-GlcNAc6S-G-GlcNAc6S-I-GlcNAc6S-G-R<sub>2</sub> structure, where R<sub>2</sub> is C<sub>7</sub>H<sub>7</sub>O.

| #23                                                        |                   |                          |        |        |             |             |             |             |
|------------------------------------------------------------|-------------------|--------------------------|--------|--------|-------------|-------------|-------------|-------------|
| GlcNAc6S-I-GlcNAc6S-G-GlcNAc6S-I-GlcNAc6S-G-R <sub>2</sub> |                   |                          |        |        |             |             |             |             |
| [M-4H] <sup>4-</sup>                                       | 489.07            | 400.8 (0.3) <sup>2</sup> |        |        |             |             |             |             |
| [M-5H] <sup>5-</sup>                                       | 391.05            | 435.6 (0.4)              |        |        |             |             |             |             |
| [M-6H] <sup>6-</sup>                                       | 325.7             | 453.4 (0.7)              |        |        |             |             |             |             |
|                                                            | (1-) <sup>1</sup> | (2-)                     | (3-)   | (4-)   | (1-)        | (2-)        | (3-)        | (4-)        |
| B1                                                         | 282.03            | 140.51                   | 93.34  | 69.75  | 93.3 (0.6)  | x           | x           | x           |
| B2                                                         | 458.06            | 228.53                   | 152.01 | 113.76 | x           | x           | x           | x           |
| B3                                                         | 741.10            | 370.04                   | 246.36 | 184.52 | x           | x           | x           | x           |
| B4                                                         | 917.13            | 458.06                   | 305.04 | 228.53 | x           | x           | x           | x           |
| B5                                                         | 1200.16           | 599.58                   | 399.38 | 299.29 | x           | x           | 272.0 (0.1) | x           |
| B6                                                         | 1376.20           | 687.59                   | 458.06 | 343.29 | x           | x           | x           | x           |
| B7                                                         | 1659.23           | 829.11                   | 552.41 | 414.05 | x           | x           | x           | x           |
| B8                                                         | 1835.27           | 917.13                   | 611.08 | 458.06 | x           | x           | x           | x           |
| Y0                                                         | 122.04            | 60.51                    | 40.01  | 29.75  | x           | x           | x           | x           |
| Y1                                                         | 299.08            | 149.03                   | 99.02  | 74.01  | x           | x           | x           | x           |
| Y2                                                         | 582.11            | 290.55                   | 193.37 | 144.77 | 155.0 (0.2) | x           | x           | x           |
| Y3                                                         | 758.14            | 378.57                   | 252.04 | 188.78 | x           | x           | x           | x           |
| Y4                                                         | 1041.18           | 520.09                   | 346.39 | 259.54 | x           | x           | x           | x           |
| Y5                                                         | 1217.21           | 608.10                   | 405.07 | 303.55 | x           | x           | x           | x           |
| Y6                                                         | 1500.25           | 749.62                   | 499.41 | 374.31 | x           | x           | x           | 339.5 (0.3) |
| Y7                                                         | 1676.28           | 837.64                   | 558.09 | 418.31 | x           | x           | x           | 366.4 (0.3) |
| C1                                                         | 300.04            | 149.52                   | 99.34  | 74.25  | 93.2 (0.1)  | x           | x           | x           |
| C2                                                         | 476.07            | 237.53                   | 158.02 | 118.26 | 122.0 (0.2) | 132.8 (0.4) | x           | x           |
| C3                                                         | 759.11            | 379.05                   | 252.36 | 189.02 | x           | x           | x           | x           |
| C4                                                         | 935.14            | 467.07                   | 311.04 | 233.03 | x           | x           | x           | x           |

|    |         |        |        |        |   |   |   |             |
|----|---------|--------|--------|--------|---|---|---|-------------|
| C5 | 1218.18 | 608.58 | 405.39 | 303.79 | x | x | x | x           |
| C6 | 1394.21 | 696.60 | 464.06 | 347.80 | x | x | x | 315.3 (0.3) |
| C7 | 1677.24 | 838.12 | 558.41 | 418.56 | x | x | x | 367.2 (0.5) |
| C8 | 1853.28 | 926.13 | 617.09 | 462.56 | x | x | x | x           |
|    |         |        |        |        |   |   |   |             |
| Z0 | 105.03  | 52.01  | 34.34  | 25.50  | x | x | x | x           |
| Z1 | 281.07  | 140.03 | 93.02  | 69.51  | x | x | x | x           |
| Z2 | 564.10  | 281.55 | 187.36 | 140.27 | x | x | x | x           |
| Z3 | 740.13  | 369.56 | 246.04 | 184.28 | x | x | x | x           |
| Z4 | 1023.17 | 511.08 | 340.38 | 255.04 | x | x | x | x           |
| Z5 | 1199.20 | 599.10 | 399.06 | 299.04 | x | x | x | x           |
| Z6 | 1482.24 | 740.62 | 493.41 | 369.80 | x | x | x | x           |
| Z7 | 1658.27 | 828.63 | 552.09 | 413.81 | x | x | x | x           |

169

170 <sup>1</sup> Columns represent different charge states.

171 <sup>2</sup> Each CCS is an average of independent measurements with the corresponding standard deviation

172

173

174

175

176  
177

**Supplementary Table 14.** CCS of B, Y, C and Z ions identified in an octa-saccharide GlcNAc6S-G-GlcNAc6S-I-GlcNAc6S-G-GlcNAc6S-I-R<sub>2</sub> structure, where R<sub>2</sub> is C<sub>7</sub>H<sub>7</sub>O.

| #24                                                        |                   |                          |        |        |             |             |             |             |
|------------------------------------------------------------|-------------------|--------------------------|--------|--------|-------------|-------------|-------------|-------------|
| GlcNAc6S-G-GlcNAc6S-I-GlcNAc6S-G-GlcNAc6S-I-R <sub>2</sub> |                   |                          |        |        |             |             |             |             |
| [M-4H] <sup>4-</sup>                                       | 489.07            | 378.3 (0.5) <sup>2</sup> |        |        |             |             |             |             |
| [M-5H] <sup>5-</sup>                                       | 391.05            | 439.7 (0.4)              |        |        |             |             |             |             |
| [M-6H] <sup>6-</sup>                                       | 325.7             | 451.4 (0.6)              |        |        |             |             |             |             |
|                                                            | (1-) <sup>1</sup> | (2-)                     | (3-)   | (4-)   | (1-)        | (2-)        | (3-)        | (4-)        |
| B1                                                         | 282.03            | 140.51                   | 93.34  | 69.75  | 93.1 (0.4)  | x           | x           | x           |
| B2                                                         | 458.06            | 228.53                   | 152.01 | 113.76 | 121.4 (0.6) | x           | x           | x           |
| B3                                                         | 741.10            | 370.04                   | 246.36 | 184.52 | x           | 170.5 (0.6) | x           | x           |
| B4                                                         | 917.13            | 458.06                   | 305.04 | 228.53 | x           | x           | x           | x           |
| B5                                                         | 1200.16           | 599.58                   | 399.38 | 299.29 | x           | x           | 270.9 (0.8) | x           |
| B6                                                         | 1376.20           | 687.59                   | 458.06 | 343.29 | x           | x           | x           | x           |
| B7                                                         | 1659.23           | 829.11                   | 552.41 | 414.05 | x           | x           | x           | 366.2 (0.5) |
| B8                                                         | 1835.27           | 917.13                   | 611.08 | 458.06 | x           | x           | x           | x           |
| Y0                                                         | 122.04            | 60.51                    | 40.01  | 29.75  | x           | x           | x           | x           |
| Y1                                                         | 299.08            | 149.03                   | 99.02  | 74.01  | 103.1 (0.4) | x           | x           | x           |
| Y2                                                         | 582.11            | 290.55                   | 193.37 | 144.77 | 153.4 (0.3) | x           | x           | x           |
| Y3                                                         | 758.14            | 378.57                   | 252.04 | 188.78 | x           | x           | x           | x           |
| Y4                                                         | 1041.18           | 520.09                   | 346.39 | 259.54 | x           | x           | x           | x           |
| Y5                                                         | 1217.21           | 608.10                   | 405.07 | 303.55 | x           | 226.0 (0.5) | 289.6 (0.6) | x           |
| Y6                                                         | 1500.25           | 749.62                   | 499.41 | 374.31 | x           | 288.4 (0.4) | x           | x           |
| Y7                                                         | 1676.28           | 837.64                   | 558.09 | 418.31 | x           | x           | x           | x           |
| C1                                                         | 300.04            | 149.52                   | 99.34  | 74.25  | 94.1 (0.2)  | x           | x           | x           |
| C2                                                         | 476.07            | 237.53                   | 158.02 | 118.26 | 122.2 (0.2) | x           | x           | x           |
| C3                                                         | 759.11            | 379.05                   | 252.36 | 189.02 | x           | x           | x           | x           |
| C4                                                         | 935.14            | 467.07                   | 311.04 | 233.03 | x           | x           | x           | x           |

|    |         |        |        |        |   |   |   |   |
|----|---------|--------|--------|--------|---|---|---|---|
| C5 | 1218.18 | 608.58 | 405.39 | 303.79 | x | x | x | x |
| C6 | 1394.21 | 696.60 | 464.06 | 347.80 | x | x | x | x |
| C7 | 1677.24 | 838.12 | 558.41 | 418.56 | x | x | x | x |
| C8 | 1853.28 | 926.13 | 617.09 | 462.56 | x | x | x | x |
|    |         |        |        |        |   |   |   |   |
| Z0 | 105.03  | 52.01  | 34.34  | 25.50  | x | x | x | x |
| Z1 | 281.07  | 140.03 | 93.02  | 69.51  | x | x | x | x |
| Z2 | 564.10  | 281.55 | 187.36 | 140.27 | x | x | x | x |
| Z3 | 740.13  | 369.56 | 246.04 | 184.28 | x | x | x | x |
| Z4 | 1023.17 | 511.08 | 340.38 | 255.04 | x | x | x | x |
| Z5 | 1199.20 | 599.10 | 399.06 | 299.04 | x | x | x | x |
| Z6 | 1482.24 | 740.62 | 493.41 | 369.80 | x | x | x | x |
| Z7 | 1658.27 | 828.63 | 552.09 | 413.81 | x | x | x | x |

178

179 <sup>1</sup> Columns represent different charge states.

180 <sup>2</sup> Each CCS is an average of independent measurements with the corresponding standard deviation

181



182 **Supplementary Table 15.** CCS of B, Y, C and Z ions identified in a 9mer, G-GlcNS-G-GlcNS-I-GlcNS-G-GlcNS-G-R<sub>3</sub> structure, where R<sub>3</sub> is C<sub>6</sub>H<sub>4</sub>NO<sub>2</sub>.

| #25                                              |                   |                          |        |        |             |             |             |             |
|--------------------------------------------------|-------------------|--------------------------|--------|--------|-------------|-------------|-------------|-------------|
| G-GlcNS-G-GlcNS-I-GlcNS-G-GlcNS-G-R <sub>3</sub> |                   |                          |        |        |             |             |             |             |
| [M-4H] <sup>4-</sup>                             | 494.81            | 437.4 (0.3) <sup>2</sup> |        |        |             |             |             |             |
| [M-5H] <sup>5-</sup>                             | 395.65            | 438.4 (0.8)              |        |        |             |             |             |             |
|                                                  | (1-) <sup>1</sup> | (2-)                     | (3-)   | (4-)   | (1-)        | (2-)        | (3-)        | (4-)        |
| B1                                               | 175.02            | 87.01                    | 57.67  | 43.00  | 71.5 (0.3)  | x           | x           | x           |
| B2                                               | 416.05            | 207.52                   | 138.01 | 103.26 | 112.4 (0.4) | x           | x           | x           |
| B3                                               | 592.08            | 295.54                   | 196.69 | 147.26 | x           | 157.8 (0.4) | x           | x           |
| B4                                               | 833.11            | 416.05                   | 277.03 | 207.52 | x           | 197.4 (0.4) | x           | x           |
| B5                                               | 1009.14           | 504.07                   | 335.71 | 251.53 | x           | 235.2 (0.5) | x           | x           |
| B6                                               | 1250.17           | 624.58                   | 416.05 | 311.79 | x           | x           | x           | x           |
| B7                                               | 1426.20           | 712.59                   | 474.73 | 355.79 | x           | x           | 321.4 (0.4) | x           |
| B8                                               | 1667.22           | 833.11                   | 555.07 | 416.05 | x           | x           | x           | x           |
| B9                                               | 1843.25           | 921.12                   | 613.75 | 460.06 | x           | x           | x           | 407.6 (0.5) |
| Y0                                               | 138.02            | 68.51                    | 45.33  | 33.75  | x           | x           | x           | x           |
| Y1                                               | 314.05            | 156.52                   | 104.01 | 77.76  | x           | x           | x           | x           |
| Y2                                               | 555.08            | 277.03                   | 184.35 | 138.01 | x           | x           | x           | x           |
| Y3                                               | 731.11            | 365.05                   | 243.03 | 182.02 | x           | x           | x           | x           |
| Y4                                               | 972.13            | 485.56                   | 323.37 | 242.28 | x           | x           | x           | x           |
| Y5                                               | 1148.17           | 573.58                   | 382.05 | 286.29 | x           | x           | x           | x           |
| Y6                                               | 1389.19           | 694.09                   | 462.39 | 346.54 | x           | x           | x           | x           |
| Y7                                               | 1565.22           | 782.11                   | 521.07 | 390.55 | x           | x           | x           | x           |
| Y8                                               | 1806.25           | 902.62                   | 601.41 | 450.81 | x           | x           | x           | x           |
| C1                                               | 192.03            | 95.51                    | 63.34  | 47.25  | x           | x           | x           | x           |
| C2                                               | 433.05            | 216.02                   | 143.68 | 107.51 | x           | x           | x           | x           |
| C3                                               | 609.08            | 304.04                   | 202.36 | 151.52 | x           | x           | x           | x           |
| C4                                               | 850.11            | 424.55                   | 282.70 | 211.77 | x           | x           | x           | x           |

|    |         |        |        |        |   |   |   |   |
|----|---------|--------|--------|--------|---|---|---|---|
| C5 | 1026.14 | 512.57 | 341.38 | 255.78 | x | x | x | x |
| C6 | 1267.17 | 633.08 | 421.72 | 316.04 | x | x | x | x |
| C7 | 1443.20 | 721.10 | 480.39 | 360.04 | x | x | x | x |
| C8 | 1684.23 | 841.61 | 560.74 | 420.30 | x | x | x | x |
| C9 | 1860.26 | 929.62 | 619.41 | 464.31 | x | x | x | x |
|    |         |        |        |        |   |   |   |   |
| Z0 | 120.01  | 59.50  | 39.33  | 29.25  | x | x | x | x |
| Z1 | 296.04  | 147.52 | 98.01  | 73.25  | x | x | x | x |
| Z2 | 537.07  | 268.03 | 178.35 | 133.51 | x | x | x | x |
| Z3 | 713.10  | 356.05 | 237.03 | 177.52 | x | x | x | x |
| Z4 | 954.12  | 476.56 | 317.37 | 237.78 | x | x | x | x |
| Z5 | 1130.16 | 564.57 | 376.05 | 281.78 | x | x | x | x |
| Z6 | 1371.18 | 685.09 | 456.39 | 342.04 | x | x | x | x |
| Z7 | 1547.21 | 773.10 | 515.07 | 386.05 | x | x | x | x |
| Z8 | 1788.24 | 893.62 | 595.41 | 446.30 | x | x | x | x |

183 <sup>1</sup> Columns represent different charge states.

184 <sup>2</sup> Each CCS is an average of independent measurements with the corresponding standard deviation

185 **Supplementary Table 16.** CCS of B, Y, C and Z ions identified in a dp9 + 1x2O-sulfate, G-GlcNS-G-GlcNS-I2S-GlcNS-G-GlcNS-G-R<sub>3</sub> structure, where R<sub>3</sub>  
 186 is C<sub>6</sub>H<sub>4</sub>NO<sub>2</sub>.

| #26                                                |                   |                          |        |        |             |             |             |             |
|----------------------------------------------------|-------------------|--------------------------|--------|--------|-------------|-------------|-------------|-------------|
| G-GlcNS-G-GlcNS-I2S-GlcNS-G-GlcNS-G-R <sub>3</sub> |                   |                          |        |        |             |             |             |             |
| [M-4H] <sup>4-</sup>                               | 514.8             | 441.4 (0.3) <sup>2</sup> |        |        |             |             |             |             |
| [M-5H] <sup>5-</sup>                               | 411.64            | 445.7 (0.5)              |        |        |             |             |             |             |
|                                                    | (1-) <sup>1</sup> | (2-)                     | (3-)   | (4-)   | (1-)        | (2-)        | (3-)        | (4-)        |
| B1                                                 | 175.02            | 87.01                    | 57.67  | 43.00  | x           | x           | x           | x           |
| B2                                                 | 416.05            | 207.52                   | 138.01 | 103.26 | 112.2 (0.2) | x           | x           | x           |
| B3                                                 | 592.08            | 295.54                   | 196.69 | 147.26 | x           | 158.0 (0.2) | x           | x           |
| B4                                                 | 833.11            | 416.05                   | 277.03 | 207.52 | x           | 197.3 (0.6) | x           | x           |
| B5                                                 | 1089.10           | 544.04                   | 362.36 | 271.52 | x           | x           | 249.6 (0.7) | x           |
| B6                                                 | 1330.12           | 664.56                   | 442.70 | 331.77 | x           | x           | x           | x           |
| B7                                                 | 1506.15           | 752.57                   | 501.38 | 375.78 | x           | x           | 330.0 (0.6) | x           |
| B8                                                 | 1747.18           | 873.09                   | 581.72 | 436.04 | x           | x           | x           | 379.0 (0.4) |
| B9                                                 | 1923.21           | 961.10                   | 640.40 | 480.05 | x           | x           | x           | 405.5 (0.2) |
|                                                    |                   |                          |        |        |             |             |             |             |
| Y0                                                 | 138.02            | 68.51                    | 45.33  | 33.75  | x           | x           | x           | x           |
| Y1                                                 | 314.05            | 156.52                   | 104.01 | 77.76  | x           | x           | x           | x           |
| Y2                                                 | 555.08            | 277.03                   | 184.35 | 138.01 | x           | x           | x           | x           |
| Y3                                                 | 731.11            | 365.05                   | 243.03 | 182.02 | x           | x           | x           | x           |
| Y4                                                 | 972.13            | 485.56                   | 323.37 | 242.28 | x           | x           | x           | x           |
| Y5                                                 | 1228.12           | 613.56                   | 408.70 | 306.27 | x           | x           | x           | x           |
| Y6                                                 | 1469.15           | 734.07                   | 489.04 | 366.53 | x           | x           | x           | x           |
| Y7                                                 | 1645.18           | 822.09                   | 547.72 | 410.54 | x           | x           | x           | x           |
| Y8                                                 | 1886.21           | 942.60                   | 628.06 | 470.80 | x           | x           | x           | x           |
|                                                    |                   |                          |        |        |             |             |             |             |
| C1                                                 | 192.03            | 95.51                    | 63.34  | 47.25  | x           | x           | x           | x           |
| C2                                                 | 433.05            | 216.02                   | 143.68 | 107.51 | x           | x           | x           | x           |
| C3                                                 | 609.08            | 304.04                   | 202.36 | 151.52 | x           | x           | x           | x           |

|    |         |        |        |        |   |   |   |   |
|----|---------|--------|--------|--------|---|---|---|---|
| C4 | 850.11  | 424.55 | 282.70 | 211.77 | x | x | x | x |
| C5 | 1106.10 | 552.55 | 368.03 | 275.77 | x | x | x | x |
| C6 | 1347.12 | 673.06 | 448.37 | 336.03 | x | x | x | x |
| C7 | 1523.16 | 761.07 | 507.05 | 380.03 | x | x | x | x |
| C8 | 1764.18 | 881.59 | 587.39 | 440.29 | x | x | x | x |
| C9 | 1940.21 | 969.60 | 646.07 | 484.30 | x | x | x | x |
|    |         |        |        |        |   |   |   |   |
| Z0 | 120.01  | 59.50  | 39.33  | 29.25  | x | x | x | x |
| Z1 | 296.04  | 147.52 | 98.01  | 73.25  | x | x | x | x |
| Z2 | 537.07  | 268.03 | 178.35 | 133.51 | x | x | x | x |
| Z3 | 713.10  | 356.05 | 237.03 | 177.52 | x | x | x | x |
| Z4 | 954.12  | 476.56 | 317.37 | 237.78 | x | x | x | x |
| Z5 | 1210.11 | 604.55 | 402.70 | 301.77 | x | x | x | x |
| Z6 | 1451.14 | 725.07 | 483.04 | 362.03 | x | x | x | x |
| Z7 | 1627.17 | 813.08 | 541.72 | 406.04 | x | x | x | x |
| Z8 | 1868.20 | 933.59 | 622.06 | 466.29 | x | x | x | x |

187

188 <sup>1</sup> Columns represent different charge states.

189 <sup>2</sup> Each CCS is an average of independent measurements with the corresponding standard deviation

190

191

192 **Supplementary Table 17.** CCS of B, Y, C and Z ions identified in a dp10 GlcNAc6S-[I-GlcNAc6S]<sub>4</sub>-I-R<sub>2</sub> structure, where R<sub>2</sub> is C<sub>7</sub>H<sub>7</sub>O.

| #27                                                  |                   |                          |        |        |             |             |             |             |
|------------------------------------------------------|-------------------|--------------------------|--------|--------|-------------|-------------|-------------|-------------|
| GlcNAc6S-[I-GlcNAc6S] <sub>4</sub> -I-R <sub>2</sub> |                   |                          |        |        |             |             |             |             |
| [M-5H] <sup>5-</sup>                                 | 482.87            | 499.8 (0.4) <sup>2</sup> |        |        |             |             |             |             |
| [M-6H] <sup>6-</sup>                                 | 402.22            | 536.4 (0.7)              |        |        |             |             |             |             |
|                                                      | (1-) <sup>1</sup> | (2-)                     | (3-)   | (4-)   | (1-)        | (2-)        | (3-)        | (4-)        |
| B1                                                   | 282.03            | 140.51                   | 93.34  | 69.75  | 92.9 (0.5)  | x           | x           | x           |
| B2                                                   | 458.06            | 228.53                   | 152.01 | 113.76 | 121.8 (0.6) | x           | x           | x           |
| B3                                                   | 741.10            | 370.04                   | 246.36 | 184.52 | x           | 176.0 (0.7) | x           | x           |
| B4                                                   | 917.13            | 458.06                   | 305.04 | 228.53 | x           | 197.2 (0.5) | x           | x           |
| B5                                                   | 1200.16           | 599.58                   | 399.38 | 299.29 | x           | x           | 269.1 (0.3) | x           |
| B6                                                   | 1376.20           | 687.59                   | 458.06 | 343.29 | x           | x           | 294.6 (0.2) | x           |
| B7                                                   | 1659.23           | 829.11                   | 552.41 | 414.05 | x           | x           | x           | x           |
| B8                                                   | 1835.27           | 917.13                   | 611.08 | 458.06 | x           | x           | x           | 394.0 (0.6) |
| B9                                                   | 2118.30           | 1058.65                  | 705.43 | 528.82 | x           | x           | x           | x           |
| B10                                                  | 2294.33           | 1146.66                  | 764.11 | 572.83 | x           | x           | x           | x           |
| Y0                                                   | 123.04            | 61.02                    | 40.34  | 30.01  | 69.3 (0.1)  | x           | x           | x           |
| Y1                                                   | 299.08            | 149.03                   | 99.02  | 74.01  | x           | x           | x           | x           |
| Y2                                                   | 582.11            | 290.55                   | 193.37 | 144.77 | x           | 166.3 (0.8) | x           | x           |
| Y3                                                   | 758.14            | 378.57                   | 252.04 | 188.78 | x           | x           | x           | x           |
| Y4                                                   | 1041.18           | 520.09                   | 346.39 | 259.54 | x           | x           | x           | x           |
| Y5                                                   | 1217.21           | 608.10                   | 405.07 | 303.55 | x           | x           | x           | x           |
| Y6                                                   | 1500.25           | 749.62                   | 499.41 | 374.31 | x           | x           | x           | x           |
| Y7                                                   | 1676.28           | 837.64                   | 558.09 | 418.31 | x           | x           | 368.5 (0.9) | x           |
| Y8                                                   | 1959.32           | 979.15                   | 652.43 | 489.07 | x           | x           | x           | x           |
| Y9                                                   | 2135.35           | 1067.17                  | 711.11 | 533.08 | x           | x           | x           | x           |
| C1                                                   | 300.04            | 149.52                   | 99.34  | 74.25  | x           | x           | x           | x           |
| C2                                                   | 476.07            | 237.53                   | 158.02 | 118.26 | x           | x           | x           | x           |

|     |         |         |        |        |   |   |   |   |
|-----|---------|---------|--------|--------|---|---|---|---|
| C3  | 759.11  | 379.05  | 252.36 | 189.02 | x | x | x | x |
| C4  | 935.14  | 467.07  | 311.04 | 233.03 | x | x | x | x |
| C5  | 1218.18 | 608.58  | 405.39 | 303.79 | x | x | x | x |
| C6  | 1394.21 | 696.60  | 464.06 | 347.80 | x | x | x | x |
| C7  | 1677.24 | 838.12  | 558.41 | 418.56 | x | x | x | x |
| C8  | 1853.28 | 926.13  | 617.09 | 462.56 | x | x | x | x |
| C9  | 2136.31 | 1067.65 | 711.43 | 533.32 | x | x | x | x |
| C10 | 2312.34 | 1155.67 | 770.11 | 577.33 | x | x | x | x |
|     |         |         |        |        |   |   |   |   |
| Z0  | 105.03  | 52.01   | 34.34  | 25.50  | x | x | x | x |
| Z1  | 281.07  | 140.03  | 93.02  | 69.51  | x | x | x | x |
| Z2  | 564.10  | 281.55  | 187.36 | 140.27 | x | x | x | x |
| Z3  | 740.13  | 369.56  | 246.04 | 184.28 | x | x | x | x |
| Z4  | 1023.17 | 511.08  | 340.38 | 255.04 | x | x | x | x |
| Z5  | 1199.20 | 599.10  | 399.06 | 299.04 | x | x | x | x |
| Z6  | 1482.24 | 740.62  | 493.41 | 369.80 | x | x | x | x |
| Z7  | 1658.27 | 828.63  | 552.09 | 413.81 | x | x | x | x |
| Z8  | 1941.31 | 970.15  | 646.43 | 484.57 | x | x | x | x |
| Z9  | 2117.34 | 1058.17 | 705.11 | 528.58 | x | x | x | x |

193

194 <sup>1</sup> Columns represent different charge states.

195 <sup>2</sup> Each CCS is an average of independent measurements with the corresponding standard deviation

196

197 **Supplementary Table 18.** CCS of B, Y, C and Z ions identified in a dp10 GlcNAc6S-[G-GlcNAc6S]<sub>4</sub>-G-R<sub>2</sub> structure, where R<sub>2</sub> is C<sub>7</sub>H<sub>7</sub>O.

| #28                                                  |                   |                          |        |        |             |             |             |             |
|------------------------------------------------------|-------------------|--------------------------|--------|--------|-------------|-------------|-------------|-------------|
| GlcNAc6S-[G-GlcNAc6S] <sub>4</sub> -G-R <sub>2</sub> |                   |                          |        |        |             |             |             |             |
| [M-5H] <sup>5-</sup>                                 | 482.87            | 496.1 (0.7) <sup>2</sup> |        |        |             |             |             |             |
| [M-6H] <sup>6-</sup>                                 | 402.22            | 524.5 (0.2)              |        |        |             |             |             |             |
|                                                      | (1-) <sup>1</sup> | (2-)                     | (3-)   | (4-)   | (1-)        | (2-)        | (3-)        | (4-)        |
| B1                                                   | 282.03            | 140.51                   | 93.34  | 69.75  | 93.2 (0.2)  | x           | x           | x           |
| B2                                                   | 458.06            | 228.53                   | 152.01 | 113.76 | 121.3 (0.8) | x           | x           | x           |
| B3                                                   | 741.10            | 370.04                   | 246.36 | 184.52 | x           | x           | x           | x           |
| B4                                                   | 917.13            | 458.06                   | 305.04 | 228.53 | x           | 194.2 (0.2) | 225.5 (0.4) | x           |
| B5                                                   | 1200.16           | 599.58                   | 399.38 | 299.29 | x           | x           | x           | x           |
| B6                                                   | 1376.20           | 687.59                   | 458.06 | 343.29 | x           | x           | 291.6 (0.2) | x           |
| B7                                                   | 1659.23           | 829.11                   | 552.41 | 414.05 | x           | x           | x           | x           |
| B8                                                   | 1835.27           | 917.13                   | 611.08 | 458.06 | x           | x           | x           | 390.9 (0.6) |
| B9                                                   | 2118.30           | 1058.65                  | 705.43 | 528.82 | x           | x           | x           | x           |
| B10                                                  | 2294.33           | 1146.66                  | 764.11 | 572.83 | x           | x           | x           | x           |
| Y0                                                   | 123.04            | 61.02                    | 40.34  | 30.01  | 69.0 (0.3)  | x           | x           | x           |
| Y1                                                   | 299.08            | 149.03                   | 99.02  | 74.01  | x           | x           | x           | x           |
| Y2                                                   | 582.11            | 290.55                   | 193.37 | 144.77 | x           | x           | x           | x           |
| Y3                                                   | 758.14            | 378.57                   | 252.04 | 188.78 | x           | x           | x           | x           |
| Y4                                                   | 1041.18           | 520.09                   | 346.39 | 259.54 | x           | x           | x           | x           |
| Y5                                                   | 1217.21           | 608.10                   | 405.07 | 303.55 | x           | x           | 281.0 (0.6) | x           |
| Y6                                                   | 1500.25           | 749.62                   | 499.41 | 374.31 | x           | x           | x           | x           |
| Y7                                                   | 1676.28           | 837.64                   | 558.09 | 418.31 | x           | x           | x           | x           |
| Y8                                                   | 1959.32           | 979.15                   | 652.43 | 489.07 | x           | x           | x           | x           |
| Y9                                                   | 2135.35           | 1067.17                  | 711.11 | 533.08 | x           | x           | x           | x           |
| C1                                                   | 300.04            | 149.52                   | 99.34  | 74.25  | x           | x           | x           | x           |
| C2                                                   | 476.07            | 237.53                   | 158.02 | 118.26 | x           | x           | x           | x           |

|     |         |         |        |        |   |   |   |   |
|-----|---------|---------|--------|--------|---|---|---|---|
| C3  | 759.11  | 379.05  | 252.36 | 189.02 | x | x | x | x |
| C4  | 935.14  | 467.07  | 311.04 | 233.03 | x | x | x | x |
| C5  | 1218.18 | 608.58  | 405.39 | 303.79 | x | x | x | x |
| C6  | 1394.21 | 696.60  | 464.06 | 347.80 | x | x | x | x |
| C7  | 1677.24 | 838.12  | 558.41 | 418.56 | x | x | x | x |
| C8  | 1853.28 | 926.13  | 617.09 | 462.56 | x | x | x | x |
| C9  | 2136.31 | 1067.65 | 711.43 | 533.32 | x | x | x | x |
| C10 | 2312.34 | 1155.67 | 770.11 | 577.33 | x | x | x | x |
|     |         |         |        |        |   |   |   |   |
| Z0  | 105.03  | 52.01   | 34.34  | 25.50  | x | x | x | x |
| Z1  | 281.07  | 140.03  | 93.02  | 69.51  | x | x | x | x |
| Z2  | 564.10  | 281.55  | 187.36 | 140.27 | x | x | x | x |
| Z3  | 740.13  | 369.56  | 246.04 | 184.28 | x | x | x | x |
| Z4  | 1023.17 | 511.08  | 340.38 | 255.04 | x | x | x | x |
| Z5  | 1199.20 | 599.10  | 399.06 | 299.04 | x | x | x | x |
| Z6  | 1482.24 | 740.62  | 493.41 | 369.80 | x | x | x | x |
| Z7  | 1658.27 | 828.63  | 552.09 | 413.81 | x | x | x | x |
| Z8  | 1941.31 | 970.15  | 646.43 | 484.57 | x | x | x | x |
| Z9  | 2117.34 | 1058.17 | 705.11 | 528.58 | x | x | x | x |

198

199 <sup>1</sup> Columns represent different charge states.

200 <sup>2</sup> Each CCS is an average of independent measurements with the corresponding standard deviation

201

202

203

204



205

206 **Supplementary Table 19.** CCS of B, Y, C and Z ions identified in disaccharide  $\Delta$ UA2S-GlcNS3S6S  
207 structure. Error +/- values are donated in brackets.

208

| #29                     |                   |             |                         |      |
|-------------------------|-------------------|-------------|-------------------------|------|
| $\Delta$ UA2S-GlcNS3S6S |                   |             |                         |      |
| [M-2H] <sup>2-</sup>    | 327.45            | 149.7 (0.2) |                         |      |
|                         | (1-) <sup>1</sup> | (2-)        | (1-)                    | (2-) |
| B1                      | 236.97            | 117.98      | 79.7 (0.3)              | x    |
| Y0                      | 417.94            | 208.47      | x                       | x    |
| C1                      | 254.98            | 126.99      | 138.6 (0.2)/162.2 (0.7) | x    |
| Z0                      | 399.93            | 199.46      | x                       | x    |

209

210 <sup>1</sup> Columns represent different charge states.

211 <sup>2</sup> Each CCS is an average of independent measurements with the corresponding standard deviation

212

213

214

215 **Supplementary Table 20.** CCS of B, Y, C and Z ions identified in tetrasaccharide  $\Delta$ UA-GlcNS-  
 216 IdoA2S-GlcNS3S structure. Error +/- values are donated in brackets.

| #30                              |                   |             |        |              |             |             |
|----------------------------------|-------------------|-------------|--------|--------------|-------------|-------------|
| $\Delta$ UA-GlcNS-IdoA2S-GlcNS3S |                   |             |        |              |             |             |
| [M-3H] <sup>3-</sup>             | 330.33            | 228.0 (0.1) |        |              |             |             |
|                                  | (1-) <sup>1</sup> | (2-)        | (3-)   | (1-)         | (2-)        | (3-)        |
| B1                               | 157.01            | 78.00       | 51.67  | 70.7 (0.4)   | x           | x           |
| B2                               | 398.04            | 198.52      | 132.01 | x            | 119.9 (0.5) | x           |
| B3                               | 654.03            | 326.51      | 217.34 | x            | 162.4 (0.3) | x           |
| B4                               | 975.01            | 487.00      | 324.33 | x            | x           | 218.1 (0.7) |
|                                  |                   |             |        |              |             |             |
| Y0                               | 337.99            | 168.49      | 111.99 | x            | 104.9 (0.1) | x           |
| Y1                               | 593.97            | 296.48      | 197.32 | x            | x           | x           |
| Y2                               | 835.00            | 417.00      | 277.66 | x            | x           | x           |
|                                  |                   |             |        |              |             |             |
| C1                               | 175.02            | 87.01       | 57.67  | 71.5 (0.5)   | x           | x           |
| C2                               | 416.05            | 207.52      | 138.01 | 113.9 (0.1)  | 120.8 (0.5) | x           |
| C3                               | 672.04            | 335.52      | 223.34 | 147.16 (0.5) | x           | x           |
|                                  |                   |             |        |              |             |             |
| Z0                               | 319.97            | 159.48      | 105.99 | x            | x           | x           |
| Z1                               | 575.96            | 287.48      | 191.32 | x            | x           | x           |
| Z2                               | 816.99            | 407.99      | 271.66 | x            | x           | x           |

217

218 <sup>1</sup> Columns represent different charge states.

219 <sup>2</sup> Each CCS is an average of independent measurements with the corresponding standard deviation

220

221

222 **Supplementary Table 21.** CCS of B, Y, C and Z ions identified in tetrasaccharide  $\Delta$ UA-GlcNS6S-  
 223 GlcA-GlcNS3S6S structure. Error +/- values are donated in brackets.

| #31                             |                   |             |             |             |
|---------------------------------|-------------------|-------------|-------------|-------------|
| $\Delta$ UA-GlcNS6S-G-GlcNS3S6S |                   |             |             |             |
| [M-3H] <sup>3-</sup>            | 356.98            | 228.9 (0.3) |             |             |
|                                 | (1-) <sup>1</sup> | (2-)        | (1-)        | (2-)        |
| B1                              | 157.01            | 78.00       | 70.0 (0.5)  | x           |
| B2                              | 478.00            | 238.49      | 118.0 (0.1) | 128.5 (0.1) |
| B3                              | 654.03            | 326.51      | x           | 163.4 (0.1) |
| Y0                              | 417.94            | 208.47      | x           | x           |
| Y1                              | 593.97            | 296.48      | x           | x           |
| Y2                              | 914.96            | 456.97      | x           | x           |
| C1                              | 175.02            | 87.01       | 71.6 (0.5)  | x           |
| C2                              | 496.01            | 247.50      | x           | 131.8 (0.4) |
| C3                              | 672.04            | 335.52      | x           | 164.7 (0.2) |
| Z0                              | 399.93            | 199.46      | x           | x           |
| Z1                              | 575.96            | 287.48      | x           | x           |
| Z2                              | 896.95            | 447.97      | x           | x           |

224

225 <sup>1</sup> Columns represent different charge states.

226 <sup>2</sup> Each CCS is an average of independent measurements with the corresponding standard deviation

227

228

229 **Supplementary Table 22.** CCS of B, Y, C and Z ions identified in tetrasaccharide  $\Delta$ UA-GlcNAc6S-  
 230 GlcA-GlcNS3S6S structure. Error +/- values are donated in brackets.

| #32                                 |                   |             |             |             |
|-------------------------------------|-------------------|-------------|-------------|-------------|
| $\Delta$ UA-GlcNAc6S-GlcA-GlcNS3S6S |                   |             |             |             |
| [M-3H] <sup>3-</sup>                | 344.33            | 234.5 (0.1) |             |             |
|                                     | (1-) <sup>1</sup> | (2-)        | (1-)        | (2-)        |
| B1                                  | 157.01            | 78.00       | 69.7 (0.1)  | x           |
| B2                                  | 440.05            | 219.52      | 117.7 (0.1) | 132.4 (0.8) |
| B3                                  | 616.08            | 307.54      | 151.7 (0.1) | x           |
| Y0                                  | 417.94            | 208.47      | x           | x           |
| Y1                                  | 593.97            | 296.48      | x           | x           |
| Y2                                  | 877.01            | 438.00      | x           | x           |
| C1                                  | 175.02            | 87.01       | 71.5 (0.5)  | x           |
| C2                                  | 458.06            | 228.53      | 120.6 (0.1) | 131.5 (0.1) |
| C3                                  | 634.09            | 316.54      | 154.3 (0.2) | x           |
| Z0                                  | 399.93            | 199.46      | x           | x           |
| Z1                                  | 575.96            | 287.48      | x           | x           |
| Z2                                  | 859.00            | 429.00      | x           | x           |

231

232 <sup>1</sup> Columns represent different charge states.

233 <sup>2</sup> Each CCS is an average of independent measurements with the corresponding standard deviation

234

235

236 **Supplementary Table 23.** CCS of B, Y, C and Z ions identified in hexasaccharide G-GlcNS6S-G-  
 237 GlcNS6S-I2S-GlcNS6S-R<sub>1</sub> structure, where R<sub>1</sub> is (CH<sub>2</sub>)<sub>5</sub>NH<sub>2</sub>.

| #33                                            |                   |             |        |            |             |             |
|------------------------------------------------|-------------------|-------------|--------|------------|-------------|-------------|
| G-GlcNS6S-G-GlcNS6S-I2S-GlcNS6S-R <sub>1</sub> |                   |             |        |            |             |             |
| [M-3H] <sup>3-</sup>                           | 557.06            | 280.5 (0.1) |        |            |             |             |
| [M-4H] <sup>4-</sup>                           | 417.52            | 339.5 (0.3) |        |            |             |             |
|                                                | (1-) <sup>1</sup> | (2-)        | (3-)   | (1-)       | (2-)        | (3-)        |
| B1                                             | 175.02            | 87.01       | 57.67  | 69.0 (0.4) | x           | x           |
| B2                                             | 496.01            | 247.50      | 164.66 | x          | 132.5 (0.5) | x           |
| B3                                             | 672.04            | 335.52      | 223.34 | x          | 161.7 (0.5) | x           |
| B4                                             | 993.02            | 496.01      | 330.34 | x          | x           | 225.1 (0.7) |
| B5                                             | 1249.01           | 624.00      | 415.66 | x          | x           | x           |
| B6                                             | 1569.99           | 784.49      | 522.66 | x          | x           | x           |
| Y0                                             | 102.09            | 50.54       | 33.36  | x          | x           | x           |
| Y1                                             | 423.07            | 211.03      | 140.35 | x          | 128.8 (0.7) | x           |
| Y2                                             | 679.06            | 339.03      | 225.68 | x          | x           | x           |
| Y3                                             | 1000.05           | 499.52      | 332.68 | x          | x           | x           |
| Y4                                             | 1176.08           | 587.53      | 391.35 | x          | x           | x           |
| Y5                                             | 1497.06           | 748.03      | 498.35 | x          | x           | x           |
| C1                                             | 193.03            | 96.01       | 63.67  | 74.2 (0.4) | x           | x           |
| C2                                             | 514.02            | 256.50      | 170.67 | x          | 133.7 (0.5) | x           |
| C3                                             | 690.05            | 344.52      | 229.34 | x          | x           | x           |
| C4                                             | 1011.03           | 505.01      | 336.34 | x          | x           | x           |
| C5                                             | 1267.02           | 633.01      | 421.67 | x          | x           | x           |
| C6                                             | 1588.00           | 793.50      | 528.66 | x          | x           | x           |
| Z0                                             | 84.08             | 41.54       | 27.36  | x          | x           | x           |
| Z1                                             | 405.06            | 202.03      | 134.35 | x          | x           | x           |
| Z2                                             | 661.05            | 330.02      | 219.68 | x          | x           | x           |
| Z3                                             | 982.03            | 490.51      | 326.67 | x          | x           | x           |
| Z4                                             | 1158.07           | 578.53      | 385.35 | x          | x           | x           |
| Z5                                             | 1479.05           | 739.02      | 492.34 | x          | x           | x           |

238

239 <sup>1</sup> Columns represent different charge states.

240 <sup>2</sup> Each CCS is an average of independent measurements with the corresponding standard deviation

241

242

243

244

245

246  
247

**Supplementary Table 24.** CCS of B, Y, C and Z ions identified in hexasaccharide G-GlcNS6S-G-GlcNS3S-I2S-GlcNS6S-(CH<sub>2</sub>)<sub>5</sub>NH<sub>2</sub> structure, where R<sub>1</sub> is (CH<sub>2</sub>)<sub>5</sub>NH<sub>2</sub>.

| #34                                            |                   |             |        |            |             |             |
|------------------------------------------------|-------------------|-------------|--------|------------|-------------|-------------|
| G-GlcNS6S-G-GlcNS3S-I2S-GlcNS6S-R <sub>1</sub> |                   |             |        |            |             |             |
| [M-3H] <sup>3-</sup>                           | 557.06            | 282.4 (0.4) |        |            |             |             |
|                                                | (1-) <sup>1</sup> | (2-)        | (3-)   | (1-)       | (2-)        | (3-)        |
| B1                                             | 175.02            | 87.01       | 57.67  | 68.8 (0.2) | x           | x           |
| B2                                             | 496.01            | 247.50      | 164.66 | x          | 132.2 (0.5) | x           |
| B3                                             | 672.04            | 335.52      | 223.34 | x          | 162.1 (0.4) | x           |
| B4                                             | 993.02            | 496.01      | 330.34 | x          | x           | 220.4 (0.5) |
| B5                                             | 1249.01           | 624.00      | 415.66 | x          | x           | x           |
| B6                                             | 1569.99           | 784.49      | 522.66 | x          | x           | x           |
| Y0                                             | 102.09            | 50.54       | 33.36  | x          | x           | x           |
| Y1                                             | 423.07            | 211.03      | 140.35 | x          | 128.9 (0.5) | x           |
| Y2                                             | 679.06            | 339.03      | 225.68 | x          | x           | x           |
| Y3                                             | 1000.05           | 499.52      | 332.68 | x          | x           | x           |
| Y4                                             | 1176.08           | 587.53      | 391.35 | x          | x           | x           |
| Y5                                             | 1497.06           | 748.03      | 498.35 | x          | x           | x           |
| C1                                             | 193.03            | 96.01       | 63.67  | 73.8 (0.4) | x           | x           |
| C2                                             | 514.02            | 256.50      | 170.67 | x          | 133.9 (0.6) | x           |
| C3                                             | 690.05            | 344.52      | 229.34 | x          | x           | x           |
| C4                                             | 1011.03           | 505.01      | 336.34 | x          | x           | x           |
| C5                                             | 1267.02           | 633.01      | 421.67 | x          | x           | x           |
| C6                                             | 1588.00           | 793.50      | 528.66 | x          | x           | x           |
| Z0                                             | 84.08             | 41.54       | 27.36  | x          | x           | x           |
| Z1                                             | 405.06            | 202.03      | 134.35 | x          | x           | x           |
| Z2                                             | 661.05            | 330.02      | 219.68 | x          | x           | x           |
| Z3                                             | 982.03            | 490.51      | 326.67 | x          | x           | x           |
| Z4                                             | 1158.07           | 578.53      | 385.35 | x          | x           | x           |
| Z5                                             | 1479.05           | 739.02      | 492.34 | x          | x           | x           |

248

249 <sup>1</sup> Columns represent different charge states.

250 <sup>2</sup> Each CCS is an average of independent measurements with the corresponding standard deviation

251

252

253 **Supplementary Table 25.** CCS of B, Y, C and Z ions identified in hexasaccharide G-GlcNS6S-G-  
 254 GlcNS6S3S-I2S-GlcNS6S-R<sub>1</sub>, where R<sub>1</sub> is (CH<sub>2</sub>)<sub>5</sub>NH<sub>2</sub>.

| #35                                              |                   |             |        |            |             |      |
|--------------------------------------------------|-------------------|-------------|--------|------------|-------------|------|
| G-GlcNS6S-G-GlcNS6S3S-I2S-GlcNS6S-R <sub>1</sub> |                   |             |        |            |             |      |
| [M-4H] <sup>4-</sup>                             | 437.51            | 328.3 (0.6) |        |            |             |      |
|                                                  | (1-) <sup>1</sup> | (2-)        | (3-)   | (1-)       | (2-)        | (3-) |
| B1                                               | 175.02            | 87.01       | 57.67  | 69.0 (0.2) | x           | x    |
| B2                                               | 496.01            | 247.50      | 164.66 | x          | 132.8 (0.4) | x    |
| B3                                               | 672.04            | 335.52      | 223.34 | x          | 162.4 (0.4) | x    |
| B4                                               | 1072.98           | 535.99      | 356.99 | x          | x           | x    |
| B5                                               | 1328.97           | 663.98      | 442.32 | x          | x           | x    |
| B6                                               | 1649.95           | 824.47      | 549.31 | x          | x           | x    |
| Y0                                               | 102.09            | 50.54       | 33.36  | x          | x           | x    |
| Y1                                               | 423.07            | 211.03      | 140.35 | x          | x           | x    |
| Y2                                               | 679.06            | 339.03      | 225.68 | x          | x           | x    |
| Y3                                               | 1080.00           | 539.50      | 359.33 | x          | x           | x    |
| Y4                                               | 1256.03           | 627.51      | 418.01 | x          | x           | x    |
| Y5                                               | 1577.02           | 788.00      | 525.00 | x          | x           | x    |
| C1                                               | 193.03            | 96.01       | 63.67  | x          | x           | x    |
| C2                                               | 514.02            | 256.50      | 170.67 | x          | x           | x    |
| C3                                               | 690.05            | 344.52      | 229.34 | x          | x           | x    |
| C4                                               | 1090.99           | 544.99      | 362.99 | x          | x           | x    |
| C5                                               | 1346.98           | 672.98      | 448.32 | x          | x           | x    |
| C6                                               | 1667.96           | 833.48      | 555.31 | x          | x           | x    |
| Z0                                               | 84.08             | 41.54       | 27.36  | x          | x           | x    |
| Z1                                               | 405.06            | 202.03      | 134.35 | x          | x           | x    |
| Z2                                               | 661.05            | 330.02      | 219.68 | x          | x           | x    |
| Z3                                               | 1061.99           | 530.49      | 353.33 | x          | x           | x    |
| Z4                                               | 1238.02           | 618.51      | 412.00 | x          | x           | x    |
| Z5                                               | 1559.01           | 779.00      | 519.00 | x          | x           | x    |

255

256 <sup>1</sup> Columns represent different charge states.

257 <sup>2</sup> Each CCS is an average of independent measurements with the corresponding standard deviation

258

259

260

261 **Supplementary Table 26.** CCS of B, Y, C and Z ions identified in a dp7 + 1x2O-sulfate, ΔUA-GlcNS-I2S-GlcNS-G-GlcNS-G-R<sub>3</sub> structure,  
 262 where R<sub>3</sub> is C<sub>6</sub>H<sub>4</sub>NO<sub>2</sub>.

| #36                                          |                   |        |        |        |             |             |             |             |
|----------------------------------------------|-------------------|--------|--------|--------|-------------|-------------|-------------|-------------|
| ΔUA-GlcNS-I2S-GlcNS-G-GlcNS-G-R <sub>3</sub> |                   |        |        |        |             |             |             |             |
|                                              | (1-) <sup>1</sup> | (2-)   | (3-)   | (4-)   | (1-)        | (2-)        | (3-)        | (4-)        |
| B1                                           | 157.01            | 78.00  | 51.67  | 38.50  | 70.5 (0.76) | x           | x           | x           |
| B2                                           | 398.04            | 198.52 | 132.01 | 98.75  | 110.5 (0.8) | 120.5 (0.5) | x           | x           |
| B3                                           | 654.03            | 326.51 | 217.34 | 162.75 | x           | 162.6 (0.5) | x           | x           |
| B4                                           | 895.05            | 447.02 | 297.68 | 223.01 | x           | 201.1 (0.5) | x           | x           |
| B5                                           | 1071.09           | 535.04 | 356.36 | 267.02 | x           | 211.7 (0.3) | 246.2 (0.8) | x           |
| B6                                           | 1312.11           | 655.55 | 436.70 | 327.27 | x           | x           | x           | x           |
| B7                                           | 1488.14           | 743.57 | 495.38 | 371.28 | x           | x           | x           | 329.8 (0.1) |
| Y0                                           | 138.02            | 68.51  | 45.33  | 33.75  | x           | x           | x           | x           |
| Y1                                           | 314.05            | 156.52 | 104.01 | 77.76  | x           | x           | x           | x           |
| Y2                                           | 555.08            | 277.03 | 184.35 | 138.01 | x           | x           | x           | x           |
| Y3                                           | 731.11            | 365.05 | 243.03 | 182.02 | x           | x           | x           | x           |
| Y4                                           | 972.13            | 485.56 | 323.37 | 242.28 | x           | x           | x           | x           |
| Y5                                           | 1228.12           | 613.56 | 408.70 | 306.27 | x           | x           | x           | x           |
| Y6                                           | 1469.15           | 734.07 | 489.04 | 366.53 | x           | x           | x           | x           |
| C1                                           | 174.02            | 86.50  | 57.33  | 42.75  | x           | x           | x           | x           |
| C2                                           | 415.04            | 207.02 | 137.68 | 103.00 | x           | x           | x           | x           |
| C3                                           | 671.03            | 335.01 | 223.01 | 167.00 | x           | x           | x           | x           |
| C4                                           | 912.06            | 455.52 | 303.35 | 227.26 | x           | x           | x           | x           |
| C5                                           | 1088.09           | 543.54 | 362.02 | 271.27 | x           | x           | x           | x           |
| C6                                           | 1329.11           | 664.05 | 442.37 | 331.52 | x           | x           | x           | x           |
| C7                                           | 1505.15           | 752.07 | 501.04 | 375.53 | x           | x           | x           | x           |
| Z0                                           | 120.01            | 59.50  | 39.33  | 29.25  | x           | x           | x           | x           |



|    |         |        |        |        |   |   |   |   |
|----|---------|--------|--------|--------|---|---|---|---|
| Z1 | 296.04  | 147.52 | 98.01  | 73.25  | x | x | x | x |
| Z2 | 537.07  | 268.03 | 178.35 | 133.51 | x | x | x | x |
| Z3 | 713.10  | 356.05 | 237.03 | 177.52 | x | x | x | x |
| Z4 | 954.12  | 476.56 | 317.37 | 237.78 | x | x | x | x |
| Z5 | 1210.11 | 604.55 | 402.70 | 301.77 | x | x | x | x |
| Z6 | 1451.14 | 725.07 | 483.04 | 362.03 | x | x | x | x |

263

264 <sup>1</sup> Columns represent different charge states.

265 <sup>2</sup> Each CCS is an average of independent measurements with the corresponding standard deviation

266

267 **Supplementary Table 27.** CCS of B, Y, C and Z (-SO<sub>3</sub>) ions identified in isomeric tetrasaccharide UA-GlcNAc6S-UA-GlcNAc6S-R<sub>+</sub> structures,  
 268 where R<sub>1</sub> is (CH<sub>2</sub>)<sub>5</sub>NH<sub>2</sub>.

|    |        |        | #9                                   |                    | #10                                  |                    | #11                                  |                    | #13                                  |                    |
|----|--------|--------|--------------------------------------|--------------------|--------------------------------------|--------------------|--------------------------------------|--------------------|--------------------------------------|--------------------|
|    |        |        | G-GlcNAc6S-G-GlcNAc6S-R <sub>1</sub> |                    | I-GlcNAc6S-I-GlcNAc6S-R <sub>1</sub> |                    | G-GlcNAc6S-I-GlcNAc6S-R <sub>1</sub> |                    | I-GlcNAc6S-G-GlcNAc6S-R <sub>1</sub> |                    |
|    |        |        | - 1SO <sub>3</sub>                   | - 1SO <sub>3</sub> | - 1SO <sub>3</sub>                   | - 1SO <sub>3</sub> | - 1SO <sub>3</sub>                   | - 1SO <sub>3</sub> | - 1SO <sub>3</sub>                   | - 2SO <sub>3</sub> |
|    |        |        | (1-) <sup>1</sup>                    | (2-)               | (1-)                                 | (2-)               | (1-)                                 | (2-)               | (1-)                                 | (2-)               |
| B1 | 95.07  | 47.03  | x                                    | x                  | x                                    | x                  | x                                    | x                  | x                                    | x                  |
| B2 | 378.10 | 188.55 | 112.04 (0.1)                         | x                  | 112.5 (0.3)                          | x                  | 112.41 (0.5)                         | x                  | 112.02 (0.2)                         | x                  |
| B3 | 554.14 | 276.56 | x                                    | x                  | x                                    | x                  | x                                    | x                  | x                                    | x                  |
| B4 | 837.17 | 418.08 | x                                    | x                  | x                                    | x                  | x                                    | x                  | x                                    | x                  |
|    |        |        |                                      |                    |                                      |                    |                                      |                    |                                      |                    |
| Y0 | 22.14  | 10.56  | x                                    | x                  | x                                    | x                  | x                                    | x                  | x                                    | x                  |
| Y1 | 305.17 | 152.08 | x                                    | x                  | x                                    | x                  | x                                    | x                  | x                                    | x                  |
| Y2 | 481.20 | 240.10 | 139.34 (0.2)                         | x                  | 137.09 (0.3)                         | x                  | 137.38 (0.6)                         | x                  | 139.3 (0.2)                          | x                  |
| Y3 | 764.24 | 381.62 | x                                    | x                  | x                                    | x                  |                                      | x                  | x                                    | x                  |
|    |        |        |                                      |                    |                                      |                    |                                      |                    |                                      |                    |
| C1 | 113.08 | 56.04  | x                                    | x                  | x                                    | x                  | x                                    | x                  | x                                    | x                  |
| C2 | 396.11 | 197.55 | 115.2 (0.6)                          | x                  | 115.7 (0.5)                          | x                  | 114.85 (0.4)                         | x                  | 114.88 (0.2)                         | x                  |
| C3 | 572.15 | 285.57 | x                                    | x                  | x                                    | x                  | x                                    | x                  | x                                    | x                  |
| C4 | 855.18 | 427.09 | x                                    | x                  | x                                    | x                  | x                                    | x                  | x                                    | x                  |
|    |        |        |                                      |                    |                                      |                    |                                      |                    |                                      |                    |
| Z0 | 4.12   | 1.56   | x                                    | x                  | x                                    | x                  | x                                    | x                  | x                                    | x                  |
| Z1 | 287.16 | 143.08 | x                                    | x                  | x                                    | x                  | x                                    | x                  | x                                    | x                  |
| Z2 | 463.19 | 231.09 | x                                    | x                  | x                                    | x                  | x                                    | x                  | x                                    | x                  |
| Z3 | 746.23 | 372.61 | x                                    | x                  | x                                    | x                  | x                                    | x                  | x                                    | x                  |

269 <sup>1</sup> Columns represent different charge states.

270 <sup>2</sup> Each CCS is an average of independent measurements with the corresponding standard deviation

271

272 **Supplementary Table 28.** CCS of B, Y, C and Z (-SO<sub>3</sub>) ions identified in isomeric tetra-saccharide UA-  
 273 GlcNS6S-UA-GlcNS6S-R<sub>1</sub> structures, where R<sub>1</sub> is (CH<sub>2</sub>)<sub>5</sub>NH<sub>2</sub>.

| #12                                |        |        |        |                    |                    |                    |
|------------------------------------|--------|--------|--------|--------------------|--------------------|--------------------|
| G-GlcNS6S-I-GlcNS6S-R <sub>1</sub> |        |        |        |                    |                    |                    |
|                                    |        |        |        | - 1SO <sub>3</sub> | - 1SO <sub>3</sub> | - 1SO <sub>3</sub> |
|                                    |        |        |        | (1-) <sup>1</sup>  | (2-)               | (3-)               |
| B1                                 | 95.07  | 47.03  | 31.02  | x                  | x                  | x                  |
| B2                                 | 416.05 | 207.52 | 138.01 | x                  | 122.4 (0.3)        | x                  |
| B3                                 | 592.08 | 295.54 | 196.69 | 139.6 (0.3)        | x                  | x                  |
| B4                                 | 913.06 | 456.03 | 303.68 | x                  | x                  | 214.9 (0.2)        |
| Y0                                 | 22.14  | 10.56  | 6.71   | x                  | x                  | x                  |
| Y1                                 | 343.12 | 171.05 | 113.70 | x                  | x                  | x                  |
| Y2                                 | 519.15 | 259.07 | 172.38 | x                  | x                  | x                  |
| Y3                                 | 840.13 | 419.56 | 279.37 | x                  | x                  | x                  |
| C1                                 | 113.08 | 56.04  | 37.02  | x                  | x                  | x                  |
| C2                                 | 434.06 | 216.53 | 144.01 | x                  | x                  | x                  |
| C3                                 | 610.09 | 304.54 | 202.69 | x                  | x                  | x                  |
| C4                                 | 931.07 | 465.03 | 309.69 | x                  | x                  | x                  |
| Z0                                 | 4.12   | 1.56   | 0.70   | x                  | x                  | x                  |
| Z1                                 | 325.11 | 162.05 | 107.70 | x                  | x                  | x                  |
| Z2                                 | 501.14 | 250.07 | 166.37 | x                  | x                  | x                  |
| Z3                                 | 822.12 | 410.56 | 273.37 | x                  | x                  | x                  |

274

275 <sup>1</sup> Columns represent different charge states.

276 <sup>2</sup> Each CCS is an average of independent measurements with the corresponding standard deviation

277

278

279 **Supplementary Table 29.** CCS of B, Y, C and Z (-SO<sub>3</sub>) ions identified in isomeric tetra-saccharide UA-  
 280 GlcNS6S-UA-GlcNS6S-R<sub>1</sub> structures, where R<sub>1</sub> is (CH<sub>2</sub>)<sub>5</sub>NH<sub>2</sub>.

| #14                                |                    |                    |                         |                    |
|------------------------------------|--------------------|--------------------|-------------------------|--------------------|
| I-GlcNS6S-G-GlcNS6S-R <sub>1</sub> |                    |                    |                         |                    |
|                                    | - 1SO <sub>3</sub> | - 1SO <sub>3</sub> | - 1SO <sub>3</sub>      | - 1SO <sub>3</sub> |
|                                    | (1-)               | (2-)               | (1-)                    | (2-)               |
| B1                                 | 95.07              | 47.03              | x                       | x                  |
| B2                                 | 416.05             | 207.52             | x                       | x                  |
| B3                                 | 592.08             | 295.54             | x                       | x                  |
| B4                                 | 913.06             | 456.03             | x                       | x                  |
| Y0                                 | 22.14              | 10.56              | x                       | x                  |
| Y1                                 | 343.12             | 171.05             | 108.9(0.1) <sup>2</sup> | x                  |
| Y2                                 | 519.15             | 259.07             | 133.7 (0.1)             | 149.8 (0.3)        |
| Y3                                 | 840.13             | 419.56             | x                       | 175.7 (0.8)        |
| C1                                 | 113.08             | 56.04              | x                       | x                  |
| C2                                 | 434.06             | 216.53             | x                       | x                  |
| C3                                 | 610.09             | 304.54             | x                       | x                  |
| C4                                 | 931.07             | 465.03             | x                       | x                  |
| Z0                                 | 4.12               | 1.56               | x                       | x                  |
| Z1                                 | 325.11             | 162.05             | x                       | x                  |
| Z2                                 | 501.14             | 250.07             | x                       | x                  |
| Z3                                 | 822.12             | 410.56             | x                       | x                  |

281

282 <sup>1</sup> Columns represent different charge states.

283 <sup>2</sup> Each CCS is an average of independent measurements with the corresponding standard deviation

284

285 **Supplementary Table 30.** CCS of B, Y, C and Z (-SO<sub>3</sub>) ions identified in isomeric tetra-saccharide G-  
 286 GlcNS6S-I2S-GlcNS6S-R<sub>1</sub> structures, where R<sub>1</sub> is (CH<sub>2</sub>)<sub>5</sub>NH<sub>2</sub>.

| #15                                  |                    |                    |                    |             |                          |             |
|--------------------------------------|--------------------|--------------------|--------------------|-------------|--------------------------|-------------|
| G-GlcNS6S-I2S-GlcNS6S-R <sub>1</sub> |                    |                    |                    |             |                          |             |
|                                      | - 1SO <sub>3</sub> | - 1SO <sub>3</sub> | - 1SO <sub>3</sub> |             |                          |             |
|                                      | (1-) <sup>1</sup>  | (2-)               | (3-)               |             |                          |             |
| B1                                   | 95.07              | 47.03              | 31.02              | x           | x                        | x           |
| B2                                   | 416.05             | 207.52             | 138.01             | x           | 122.4 (0.1) <sup>2</sup> | x           |
| B3                                   | 672.04             | 335.52             | 223.34             | x           | 167.1 (0.4)              | x           |
| B4                                   | 993.02             | 496.01             | 330.34             | x           | x                        | 226.7 (0.2) |
| Y0                                   | 22.14              | 10.56              | 6.71               | x           | x                        | x           |
| Y1                                   | 343.12             | 171.05             | 113.70             | 109.3 (0.6) | x                        | x           |
| Y2                                   | 599.11             | 299.05             | 199.03             | x           | x                        | x           |
| Y3                                   | 920.09             | 459.54             | 306.02             | x           | x                        | x           |
| C1                                   | 113.08             | 56.04              | 37.02              | x           | x                        | x           |
| C2                                   | 434.06             | 216.53             | 144.01             | x           | x                        | x           |
| C3                                   | 690.05             | 344.52             | 229.34             | x           | x                        | x           |
| C4                                   | 1011.03            | 505.01             | 336.34             | x           | x                        | x           |
| Z0                                   | 4.12               | 1.56               | 0.70               | x           | x                        | x           |
| Z1                                   | 325.11             | 162.05             | 107.70             | x           | x                        | x           |
| Z2                                   | 581.10             | 290.04             | 193.03             | x           | x                        | x           |
| Z3                                   | 902.08             | 450.54             | 300.02             | x           | x                        | x           |

287

288 <sup>1</sup> Columns represent different charge states.

289 <sup>2</sup> Each CCS is an average of independent measurements with the corresponding standard deviation

290

291 **Supplementary Table 31.** CCS of B, Y, C and Z (-SO<sub>3</sub>) ions identified in a hexa-saccharide structure (R<sub>1</sub>  
 292 is (CH<sub>2</sub>)<sub>5</sub>NH<sub>2</sub>).

| #16                                          |                    |                    |                    |                    |                          |                    |
|----------------------------------------------|--------------------|--------------------|--------------------|--------------------|--------------------------|--------------------|
| G-GlcNS6S-I-GlcNS6S-G-GlcNS6S-R <sub>1</sub> |                    |                    |                    |                    |                          |                    |
|                                              | - 1SO <sub>3</sub> | - 1SO <sub>3</sub> | - 1SO <sub>3</sub> | - 1SO <sub>3</sub> | - 1SO <sub>3</sub>       | - 1SO <sub>3</sub> |
|                                              | (1-) <sup>1</sup>  | (2-)               | (3-)               | (1-)               | (2-)                     | (3-)               |
| B1                                           | 95.07              | 47.03              | 31.02              | x                  | x                        | x                  |
| B2                                           | 416.05             | 207.52             | 138.01             | x                  | 122.5 (0.2) <sup>2</sup> | x                  |
| B3                                           | 592.08             | 295.54             | 196.69             | 140.2 (0.7)        | x                        | x                  |
| B4                                           | 913.06             | 456.03             | 303.68             | x                  | x                        | 214.8 (0.7)        |
| B5                                           | 1089.10            | 544.04             | 362.36             | x                  | x                        | 247.4 (0.9)        |
| B6                                           | 1410.08            | 704.54             | 469.35             | x                  | x                        | x                  |
| Y0                                           | 22.14              | 10.56              | 6.71               | x                  | x                        | x                  |
| Y1                                           | 343.12             | 171.05             | 113.70             | 109.1 (0.1)        | x                        | x                  |
| Y2                                           | 519.15             | 259.07             | 172.38             | x                  | 150.0 (0.8)              | x                  |
| Y3                                           | 840.13             | 419.56             | 279.37             | x                  | x                        | x                  |
| Y4                                           | 1016.16            | 507.58             | 338.05             | x                  | x                        | 234.8 (0.2)        |
| Y5                                           | 1337.15            | 668.07             | 445.04             | x                  | x                        | x                  |
| C1                                           | 113.08             | 56.04              | 37.02              | x                  | x                        | x                  |
| C2                                           | 434.06             | 216.53             | 144.01             | 114.8 (0.46)       | x                        | x                  |
| C3                                           | 610.09             | 304.54             | 202.69             | x                  | x                        | x                  |
| C4                                           | 931.07             | 465.03             | 309.69             | x                  | x                        | x                  |
| C5                                           | 1107.11            | 553.05             | 368.36             | x                  | x                        | x                  |
| C6                                           | 1428.09            | 713.54             | 475.36             | x                  | x                        | x                  |
| Z0                                           | 4.12               | 1.56               | 0.70               | x                  | x                        | x                  |
| Z1                                           | 325.11             | 162.05             | 107.70             | x                  | x                        | x                  |
| Z2                                           | 501.14             | 250.07             | 166.37             | x                  | x                        | x                  |
| Z3                                           | 822.12             | 410.56             | 273.37             | x                  | x                        | x                  |
| Z4                                           | 998.15             | 498.57             | 332.05             | x                  | x                        | x                  |
| Z5                                           | 1319.14            | 659.06             | 439.04             | x                  | x                        | x                  |

293

294 <sup>1</sup> Columns represent different charge states.

295 <sup>2</sup> Each CCS is an average of independent measurements with the corresponding standard deviation

296

297

298 **Supplementary Table 32.** CCS of B, Y, C and Z (-SO<sub>3</sub>) ions identified in a hexa-saccharide GlcNAc6S-  
 299 [G-GlcNAc6S]<sub>2</sub>-G-R<sub>2</sub> structure, where R<sub>2</sub> is C<sub>7</sub>H<sub>7</sub>O.

| #17                                                  |                    |                    |                    |                    |                    |                    |
|------------------------------------------------------|--------------------|--------------------|--------------------|--------------------|--------------------|--------------------|
| GlcNAc6S-[G-GlcNAc6S] <sub>2</sub> -G-R <sub>2</sub> |                    |                    |                    |                    |                    |                    |
|                                                      | - 1SO <sub>3</sub> | - 1SO <sub>3</sub> | - 1SO <sub>3</sub> | - 1SO <sub>3</sub> | - 1SO <sub>3</sub> | - 1SO <sub>3</sub> |
|                                                      | (1-) <sup>1</sup>  | (2-)               | (3-)               | (1-)               | (2-)               | (3-)               |
| B1                                                   | 202.07             | 100.53             | 66.69              | x                  | x                  | x                  |
| B2                                                   | 378.10             | 188.55             | 125.36             | 111.4 (0.2)        | x                  | x                  |
| B3                                                   | 661.14             | 330.07             | 219.71             | 160.1 (0.7)        | x                  | x                  |
| B4                                                   | 837.17             | 418.08             | 278.39             | x                  | x                  | x                  |
| B5                                                   | 1120.21            | 559.60             | 372.73             | x                  | 214.1 (0.7)        | x                  |
| B6                                                   | 1296.24            | 647.62             | 431.41             | x                  | 234.0 (0.4)        | x                  |
| Y0                                                   | 42.08              | 20.54              | 13.35              | x                  | x                  | x                  |
| Y1                                                   | 219.12             | 109.06             | 72.37              | x                  | x                  | x                  |
| Y2                                                   | 502.16             | 250.57             | 166.71             | x                  | x                  | x                  |
| Y3                                                   | 678.19             | 338.59             | 225.39             | x                  | x                  | x                  |
| Y4                                                   | 961.22             | 480.11             | 319.74             | x                  | x                  | x                  |
| Y5                                                   | 1137.26            | 568.12             | 378.41             | x                  | x                  | x                  |
| C1                                                   | 220.08             | 109.54             | 72.69              | x                  | x                  | x                  |
| C2                                                   | 396.11             | 197.55             | 131.37             | x                  | x                  | x                  |
| C3                                                   | 679.15             | 339.07             | 225.71             | x                  | x                  | x                  |
| C4                                                   | 855.18             | 427.09             | 284.39             | x                  | x                  | x                  |
| C5                                                   | 1138.22            | 568.61             | 378.73             | x                  | x                  | x                  |
| C6                                                   | 1314.25            | 656.62             | 437.41             | x                  | x                  | x                  |
| Z0                                                   | 25.08              | 12.03              | 7.69               | x                  | x                  | x                  |
| Z1                                                   | 201.11             | 100.05             | 66.36              | x                  | x                  | x                  |
| Z2                                                   | 484.15             | 241.57             | 160.71             | x                  | x                  | x                  |
| Z3                                                   | 660.18             | 329.58             | 219.39             | x                  | x                  | x                  |
| Z4                                                   | 943.21             | 471.10             | 313.73             | x                  | x                  | x                  |
| Z5                                                   | 1119.25            | 559.12             | 372.41             | x                  | x                  | X                  |

300

301 <sup>1</sup> Columns represent different charge states.

302 <sup>2</sup> Each CCS is an average of independent measurements with the corresponding standard deviation

303

304

305 **Supplementary Table 33.** CCS of B, Y, C and Z (-SO<sub>3</sub>) ions identified in a hexa-saccharide GlcNAc6S-  
 306 [I-GlcNAc6S]<sub>2</sub>-I-R<sub>2</sub> structure, where R<sub>2</sub> is C<sub>7</sub>H<sub>7</sub>O.

| #18                                                  |                    |                    |                    |                    |                    |                    |
|------------------------------------------------------|--------------------|--------------------|--------------------|--------------------|--------------------|--------------------|
| GlcNAc6S-[I-GlcNAc6S] <sub>2</sub> -I-R <sub>2</sub> |                    |                    |                    |                    |                    |                    |
|                                                      | - 1SO <sub>3</sub> | - 1SO <sub>3</sub> | - 1SO <sub>3</sub> | - 1SO <sub>3</sub> | - 1SO <sub>3</sub> | - 1SO <sub>3</sub> |
|                                                      | (1-) <sup>1</sup>  | (2-)               | (3-)               | (1-)               | (2-)               | (3-)               |
| B1                                                   | 202.07             | 100.53             | 66.69              | x                  | x                  | x                  |
| B2                                                   | 378.10             | 188.55             | 125.36             | 112.5 (0.1)        | x                  | x                  |
| B3                                                   | 661.14             | 330.07             | 219.71             | 157.7 (0.3)        | x                  | x                  |
| B4                                                   | 837.17             | 418.08             | 278.39             | x                  | 179.8 (0.9)        | x                  |
| B5                                                   | 1120.21            | 559.60             | 372.73             | x                  | 215.6 (0.2)        | x                  |
| B6                                                   | 1296.24            | 647.62             | 431.41             | x                  | 237.8 (0.4)        | x                  |
| Y0                                                   | 42.08              | 20.54              | 13.35              | x                  | x                  | x                  |
| Y1                                                   | 219.12             | 109.06             | 72.37              | x                  | x                  | x                  |
| Y2                                                   | 502.16             | 250.57             | 166.71             | x                  | x                  | x                  |
| Y3                                                   | 678.19             | 338.59             | 225.39             | x                  | x                  | x                  |
| Y4                                                   | 961.22             | 480.11             | 319.74             | x                  | x                  | x                  |
| Y5                                                   | 1137.26            | 568.12             | 378.41             | x                  | x                  | x                  |
| C1                                                   | 220.08             | 109.54             | 72.69              | x                  | x                  | x                  |
| C2                                                   | 396.11             | 197.55             | 131.37             | x                  | x                  | x                  |
| C3                                                   | 679.15             | 339.07             | 225.71             | x                  | x                  | x                  |
| C4                                                   | 855.18             | 427.09             | 284.39             | x                  | x                  | x                  |
| C5                                                   | 1138.22            | 568.61             | 378.73             | x                  | x                  | x                  |
| C6                                                   | 1314.25            | 656.62             | 437.41             | x                  | x                  | x                  |
| Z0                                                   | 25.08              | 12.03              | 7.69               | x                  | x                  | x                  |
| Z1                                                   | 201.11             | 100.05             | 66.36              | x                  | x                  | x                  |
| Z2                                                   | 484.15             | 241.57             | 160.71             | x                  | x                  | x                  |
| Z3                                                   | 660.18             | 329.58             | 219.39             | x                  | x                  | x                  |
| Z4                                                   | 943.21             | 471.10             | 313.73             | x                  | x                  | x                  |
| Z5                                                   | 1119.25            | 559.12             | 372.41             | x                  | x                  | x                  |

307

308 <sup>1</sup> Columns represent different charge states.

309 <sup>2</sup> Each CCS is an average of independent measurements with the corresponding standard deviation

310

311

312



313 **Supplementary Table 34.** CCS of B, Y, C and Z (-SO<sub>3</sub>) ions identified in an octa-saccharide GlcNAc6S-  
 314 [I-GlcNAc6S]<sub>3</sub>-I-R<sub>2</sub> structure, where R<sub>2</sub> is C<sub>7</sub>H<sub>7</sub>O.

| #19                                                  |                    |                    |                    |                          |                    |                    |
|------------------------------------------------------|--------------------|--------------------|--------------------|--------------------------|--------------------|--------------------|
| GlcNAc6S-[I-GlcNAc6S] <sub>3</sub> -I-R <sub>2</sub> |                    |                    |                    |                          |                    |                    |
|                                                      | - 1SO <sub>3</sub> | - 1SO <sub>3</sub> | - 1SO <sub>3</sub> | - 1SO <sub>3</sub>       | - 1SO <sub>3</sub> | - 1SO <sub>3</sub> |
|                                                      | (1-) <sup>1</sup>  | (2-)               | (3-)               | (1-)                     | (2-)               | (3-)               |
| B1                                                   | 202.07             | 100.53             | 66.69              | x                        | x                  | x                  |
| B2                                                   | 378.10             | 188.55             | 125.36             | 112.0 (0.3) <sup>2</sup> | x                  | x                  |
| B3                                                   | 661.14             | 330.07             | 219.71             | 158.2 (0.2)              | x                  | x                  |
| B4                                                   | 837.17             | 418.08             | 278.39             | x                        | x                  | x                  |
| B5                                                   | 1120.21            | 559.60             | 372.73             | x                        | 216.3 (0.7)        | x                  |
| B6                                                   | 1296.24            | 647.62             | 431.41             | x                        | x                  | x                  |
| B7                                                   | 1579.28            | 789.13             | 525.75             | x                        | x                  | x                  |
| B8                                                   | 1755.31            | 877.15             | 584.43             | x                        | x                  |                    |
|                                                      |                    |                    |                    |                          |                    |                    |
| Y0                                                   | 42.08              | 20.54              | 13.35              | x                        | x                  | x                  |
| Y1                                                   | 219.12             | 109.06             | 72.37              | x                        | x                  | x                  |
| Y2                                                   | 502.16             | 250.57             | 166.71             | x                        | x                  | x                  |
| Y3                                                   | 678.19             | 338.59             | 225.39             | x                        | x                  | x                  |
| Y4                                                   | 961.22             | 480.11             | 319.74             | x                        | x                  | x                  |
| Y5                                                   | 1137.26            | 568.12             | 378.41             | x                        | x                  | x                  |
| Y6                                                   | 1420.29            | 709.64             | 472.76             | x                        | x                  | x                  |
| Y7                                                   | 1596.32            | 797.66             | 531.44             | x                        | x                  | x                  |
|                                                      |                    |                    |                    |                          |                    |                    |
| C1                                                   | 220.08             | 109.54             | 72.69              | x                        | x                  | x                  |
| C2                                                   | 396.11             | 197.55             | 131.37             | x                        | x                  | x                  |
| C3                                                   | 679.15             | 339.07             | 225.71             | x                        | x                  | x                  |
| C4                                                   | 855.18             | 427.09             | 284.39             | x                        | x                  | x                  |
| C5                                                   | 1138.22            | 568.61             | 378.73             | x                        | x                  | x                  |
| C6                                                   | 1314.25            | 656.62             | 437.41             | x                        | x                  | x                  |
| C7                                                   | 1597.29            | 798.14             | 531.76             | x                        | x                  | x                  |
| C8                                                   | 1773.32            | 886.16             | 590.43             | x                        | x                  | x                  |
|                                                      |                    |                    |                    |                          |                    |                    |
| Z0                                                   | 25.08              | 12.03              | 7.69               | x                        | x                  | x                  |
| Z1                                                   | 201.11             | 100.05             | 66.36              | x                        | x                  | x                  |
| Z2                                                   | 484.15             | 241.57             | 160.71             | x                        | x                  | x                  |
| Z3                                                   | 660.18             | 329.58             | 219.39             | x                        | x                  | x                  |
| Z4                                                   | 943.21             | 471.10             | 313.73             | x                        | x                  | x                  |
| Z5                                                   | 1119.25            | 559.12             | 372.41             | x                        | x                  | x                  |
| Z6                                                   | 1402.28            | 700.64             | 466.76             | x                        | x                  | x                  |
| Z7                                                   | 1578.31            | 788.65             | 525.43             | x                        | x                  | x                  |

315 <sup>1</sup> Columns represent different charge states. <sup>2</sup> Each CCS is an average of independent measurements with  
 316 the corresponding standard deviation

317 **Supplementary Table 35.** CCS of B, Y, C and Z (-SO<sub>3</sub>) ions identified in an octa-saccharide GlcNAc6S-  
 318 [G-GlcNAc6S]<sub>3</sub>-G-R<sub>2</sub> structure, where R<sub>2</sub> is C<sub>7</sub>H<sub>7</sub>O.

| #20                                                  |                    |                    |                    |                          |                    |                    |
|------------------------------------------------------|--------------------|--------------------|--------------------|--------------------------|--------------------|--------------------|
| GlcNAc6S-[G-GlcNAc6S] <sub>3</sub> -G-R <sub>2</sub> |                    |                    |                    |                          |                    |                    |
|                                                      | - 1SO <sub>3</sub> | - 1SO <sub>3</sub> | - 1SO <sub>3</sub> | - 1SO <sub>3</sub>       | - 1SO <sub>3</sub> | - 1SO <sub>3</sub> |
|                                                      | (1-) <sup>1</sup>  | (2-)               | (3-)               | (1-)                     | (2-)               | (3-)               |
| B1                                                   | 202.07             | 100.53             | 66.69              | x                        | x                  | x                  |
| B2                                                   | 378.10             | 188.55             | 125.36             | 111.5 (0.1) <sup>2</sup> | x                  | x                  |
| B3                                                   | 661.14             | 330.07             | 219.71             | 160.4 (0.2)              | x                  | x                  |
| B4                                                   | 837.17             | 418.08             | 278.39             | x                        | 185.4 (0.4)        | x                  |
| B5                                                   | 1120.21            | 559.60             | 372.73             | x                        | 214.9 (0.8)        | x                  |
| B6                                                   | 1296.24            | 647.62             | 431.41             | x                        | x                  | x                  |
| B7                                                   | 1579.28            | 789.13             | 525.75             | x                        | x                  | x                  |
| B8                                                   | 1755.31            | 877.15             | 584.43             | x                        | x                  | x                  |
| Y0                                                   | 42.08              | 20.54              | 13.35              | x                        | x                  | x                  |
| Y1                                                   | 219.12             | 109.06             | 72.37              | x                        | x                  | x                  |
| Y2                                                   | 502.16             | 250.57             | 166.71             | x                        | x                  | x                  |
| Y3                                                   | 678.19             | 338.59             | 225.39             | x                        | x                  | x                  |
| Y4                                                   | 961.22             | 480.11             | 319.74             | x                        | 199.7 (0.18)       | x                  |
| Y5                                                   | 1137.26            | 568.12             | 378.41             | x                        | 216.2 (0.1)        | x                  |
| Y6                                                   | 1420.29            | 709.64             | 472.76             | x                        | x                  | x                  |
| Y7                                                   | 1596.32            | 797.66             | 531.44             | x                        | x                  | x                  |
| C1                                                   | 220.08             | 109.54             | 72.69              | x                        | x                  | x                  |
| C2                                                   | 396.11             | 197.55             | 131.37             | x                        | x                  | x                  |
| C3                                                   | 679.15             | 339.07             | 225.71             | x                        | x                  | x                  |
| C4                                                   | 855.18             | 427.09             | 284.39             | x                        | x                  | x                  |
| C5                                                   | 1138.22            | 568.61             | 378.73             | x                        | x                  | x                  |
| C6                                                   | 1314.25            | 656.62             | 437.41             | x                        | x                  | x                  |
| C7                                                   | 1597.29            | 798.14             | 531.76             | x                        | x                  | x                  |
| C8                                                   | 1773.32            | 886.16             | 590.43             | x                        | x                  | x                  |
| Z0                                                   | 25.08              | 12.03              | 7.69               | x                        | x                  | x                  |
| Z1                                                   | 201.11             | 100.05             | 66.36              | x                        | x                  | x                  |
| Z2                                                   | 484.15             | 241.57             | 160.71             | x                        | x                  | x                  |
| Z3                                                   | 660.18             | 329.58             | 219.39             | x                        | x                  | x                  |
| Z4                                                   | 943.21             | 471.10             | 313.73             | x                        | x                  | x                  |
| Z5                                                   | 1119.25            | 559.12             | 372.41             | x                        | x                  | x                  |
| Z6                                                   | 1402.28            | 700.64             | 466.76             | x                        | x                  | x                  |
| Z7                                                   | 1578.31            | 788.65             | 525.43             | x                        | x                  | x                  |

319 <sup>1</sup> Columns represent different charge states.

320 <sup>2</sup> Each CCS is an average of independent measurements with the corresponding standard deviation

321 **Supplementary Table 36.** CCS of B, Y, C and Z (-SO<sub>3</sub>) ions identified in an octa-saccharide GlcNAc6S-  
 322 G-GlcNAc6S-G-GlcNAc6S-I-GlcNAc6S-I-R<sub>2</sub> structure, where R<sub>2</sub> is C<sub>7</sub>H<sub>7</sub>O.

| #21                                                        |                    |                    |                    |                          |                    |                    |
|------------------------------------------------------------|--------------------|--------------------|--------------------|--------------------------|--------------------|--------------------|
| GlcNAc6S-G-GlcNAc6S-G-GlcNAc6S-I-GlcNAc6S-I-R <sub>2</sub> |                    |                    |                    |                          |                    |                    |
|                                                            | - 1SO <sub>3</sub> | - 1SO <sub>3</sub> | - 1SO <sub>3</sub> | - 1SO <sub>3</sub>       | - 1SO <sub>3</sub> | - 1SO <sub>3</sub> |
|                                                            | (1-) <sup>1</sup>  | (2-)               | (3-)               | (1-) <sup>1</sup>        | (2-)               | (3-)               |
| B1                                                         | 202.07             | 100.53             | 66.69              | x                        | x                  | x                  |
| B2                                                         | 378.10             | 188.55             | 125.36             | 112.3 (0.3) <sup>2</sup> | x                  | x                  |
| B3                                                         | 661.14             | 330.07             | 219.71             | x                        | x                  | x                  |
| B4                                                         | 837.17             | 418.08             | 278.39             | x                        | x                  | x                  |
| B5                                                         | 1120.21            | 559.60             | 372.73             | x                        | 213.8 (0.1)        | x                  |
| B6                                                         | 1296.24            | 647.62             | 431.41             | x                        | x                  | x                  |
| B7                                                         | 1579.28            | 789.13             | 525.75             | x                        | x                  | x                  |
| B8                                                         | 1755.31            | 877.15             | 584.43             | x                        | x                  | x                  |
| Y0                                                         | 42.08              | 20.54              | 13.35              | x                        | x                  | x                  |
| Y1                                                         | 219.12             | 109.06             | 72.37              | x                        | x                  | x                  |
| Y2                                                         | 502.16             | 250.57             | 166.71             | x                        | x                  | x                  |
| Y3                                                         | 678.19             | 338.59             | 225.39             | x                        | x                  | x                  |
| Y4                                                         | 961.22             | 480.11             | 319.74             | x                        | x                  | x                  |
| Y5                                                         | 1137.26            | 568.12             | 378.41             | x                        | x                  | x                  |
| Y6                                                         | 1420.29            | 709.64             | 472.76             | x                        | x                  | x                  |
| Y7                                                         | 1596.32            | 797.66             | 531.44             | x                        | x                  | x                  |
| C1                                                         | 220.08             | 109.54             | 72.69              | x                        | x                  | x                  |
| C2                                                         | 396.11             | 197.55             | 131.37             | x                        | x                  | x                  |
| C3                                                         | 679.15             | 339.07             | 225.71             | x                        | x                  | x                  |
| C4                                                         | 855.18             | 427.09             | 284.39             | x                        | x                  | x                  |
| C5                                                         | 1138.22            | 568.61             | 378.73             | x                        | x                  | x                  |
| C6                                                         | 1314.25            | 656.62             | 437.41             | x                        | x                  | x                  |
| C7                                                         | 1597.29            | 798.14             | 531.76             | x                        | x                  | x                  |
| C8                                                         | 1773.32            | 886.16             | 590.43             | x                        | x                  | x                  |
| Z0                                                         | 25.08              | 12.03              | 7.69               | x                        | x                  | x                  |
| Z1                                                         | 201.11             | 100.05             | 66.36              | x                        | x                  | x                  |
| Z2                                                         | 484.15             | 241.57             | 160.71             | x                        | x                  | x                  |
| Z3                                                         | 660.18             | 329.58             | 219.39             | x                        | x                  | x                  |
| Z4                                                         | 943.21             | 471.10             | 313.73             | x                        | x                  | x                  |
| Z5                                                         | 1119.25            | 559.12             | 372.41             | x                        | x                  | x                  |
| Z6                                                         | 1402.28            | 700.64             | 466.76             | x                        | x                  | x                  |
| Z7                                                         | 1578.31            | 788.65             | 525.43             | x                        | x                  | x                  |

323 <sup>1</sup> Columns represent different charge states.

324 <sup>2</sup> Each CCS is an average of independent measurements with the corresponding standard deviation

325 **Supplementary Table 37.** CCS of B, Y, C and Z (-SO<sub>3</sub>) ions identified in an octa-saccharide GlcNAc6S-  
 326 G-GlcNAc6S-I-GlcNAc6S-I-GlcNAc6S-G-R<sub>2</sub> structure, where R<sub>2</sub> is C<sub>7</sub>H<sub>7</sub>O.

| #22                                                        |                    |                    |                    |                          |                    |                    |
|------------------------------------------------------------|--------------------|--------------------|--------------------|--------------------------|--------------------|--------------------|
| GlcNAc6S-G-GlcNAc6S-I-GlcNAc6S-I-GlcNAc6S-G-R <sub>2</sub> |                    |                    |                    |                          |                    |                    |
|                                                            | - 1SO <sub>3</sub> | - 1SO <sub>3</sub> | - 1SO <sub>3</sub> | - 1SO <sub>3</sub>       | - 1SO <sub>3</sub> | - 1SO <sub>3</sub> |
|                                                            | (1-) <sup>1</sup>  | (2-)               | (3-)               | (1-) <sup>1</sup>        | (2-)               | (3-)               |
| B1                                                         | 202.07             | 100.53             | 66.69              | x                        | x                  | x                  |
| B2                                                         | 378.10             | 188.55             | 125.36             | 112.9 (0.6) <sup>2</sup> | x                  | x                  |
| B3                                                         | 661.14             | 330.07             | 219.71             | 159.6 (0.5)              | x                  | x                  |
| B4                                                         | 837.17             | 418.08             | 278.39             | x                        | x                  | x                  |
| B5                                                         | 1120.21            | 559.60             | 372.73             | x                        | 216.3 (0.33)       | x                  |
| B6                                                         | 1296.24            | 647.62             | 431.41             | x                        | x                  | x                  |
| B7                                                         | 1579.28            | 789.13             | 525.75             | x                        | x                  | x                  |
| B8                                                         | 1755.31            | 877.15             | 584.43             | x                        | x                  | 308.6 (0.5)        |
|                                                            |                    |                    |                    |                          |                    |                    |
| Y0                                                         | 42.08              | 20.54              | 13.35              | x                        | x                  | x                  |
| Y1                                                         | 219.12             | 109.06             | 72.37              | x                        | x                  | x                  |
| Y2                                                         | 502.16             | 250.57             | 166.71             | x                        | x                  | x                  |
| Y3                                                         | 678.19             | 338.59             | 225.39             | x                        | x                  | x                  |
| Y4                                                         | 961.22             | 480.11             | 319.74             | x                        | x                  | x                  |
| Y5                                                         | 1137.26            | 568.12             | 378.41             | x                        | x                  | x                  |
| Y6                                                         | 1420.29            | 709.64             | 472.76             | x                        | x                  | x                  |
| Y7                                                         | 1596.32            | 797.66             | 531.44             | x                        | x                  | x                  |
|                                                            |                    |                    |                    |                          |                    |                    |
| C1                                                         | 220.08             | 109.54             | 72.69              | x                        | x                  | x                  |
| C2                                                         | 396.11             | 197.55             | 131.37             | x                        | x                  | x                  |
| C3                                                         | 679.15             | 339.07             | 225.71             | x                        | x                  | x                  |
| C4                                                         | 855.18             | 427.09             | 284.39             | x                        | x                  | x                  |
| C5                                                         | 1138.22            | 568.61             | 378.73             | x                        | x                  | x                  |
| C6                                                         | 1314.25            | 656.62             | 437.41             | x                        | x                  | x                  |
| C7                                                         | 1597.29            | 798.14             | 531.76             | x                        | x                  | x                  |
| C8                                                         | 1773.32            | 886.16             | 590.43             | x                        | x                  | x                  |
|                                                            |                    |                    |                    |                          |                    |                    |
| Z0                                                         | 25.08              | 12.03              | 7.69               | x                        | x                  | x                  |
| Z1                                                         | 201.11             | 100.05             | 66.36              | x                        | x                  | x                  |
| Z2                                                         | 484.15             | 241.57             | 160.71             | x                        | x                  | x                  |
| Z3                                                         | 660.18             | 329.58             | 219.39             | x                        | x                  | x                  |
| Z4                                                         | 943.21             | 471.10             | 313.73             | x                        | x                  | x                  |
| Z5                                                         | 1119.25            | 559.12             | 372.41             | x                        | x                  | x                  |
| Z6                                                         | 1402.28            | 700.64             | 466.76             | x                        | x                  | x                  |
| Z7                                                         | 1578.31            | 788.65             | 525.43             | x                        | x                  | x                  |

327 <sup>1</sup> Columns represent different charge states.

328 <sup>2</sup> Each CCS is an average of independent measurements with the corresponding standard deviation

329 **Supplementary Table 38.** CCS of B, Y, C and Z (-SO<sub>3</sub>) ions identified in an octa-saccharide GlcNAc6S-  
 330 I-GlcNAc6S-G-GlcNAc6S-I-GlcNAc6S-G-R<sub>2</sub> structure, where R<sub>2</sub> is C<sub>7</sub>H<sub>7</sub>O.

| #23                                                        |                    |                    |                    |                          |                    |                    |
|------------------------------------------------------------|--------------------|--------------------|--------------------|--------------------------|--------------------|--------------------|
| GlcNAc6S-I-GlcNAc6S-G-GlcNAc6S-I-GlcNAc6S-G-R <sub>2</sub> |                    |                    |                    |                          |                    |                    |
|                                                            | - 1SO <sub>3</sub> | - 1SO <sub>3</sub> | - 1SO <sub>3</sub> | - 1SO <sub>3</sub>       | - 1SO <sub>3</sub> | - 1SO <sub>3</sub> |
|                                                            | (1-) <sup>1</sup>  | (2-)               | (3-)               | (1-) <sup>1</sup>        | (2-)               | (3-)               |
| B1                                                         | 202.07             | 100.53             | 66.69              | x                        | x                  | x                  |
| B2                                                         | 378.10             | 188.55             | 125.36             | 112.1 (0.3) <sup>2</sup> | x                  | x                  |
| B3                                                         | 661.14             | 330.07             | 219.71             | 157.8 (0.2)              | x                  | x                  |
| B4                                                         | 837.17             | 418.08             | 278.39             | x                        | x                  | x                  |
| B5                                                         | 1120.21            | 559.60             | 372.73             | x                        | 215.1 (0.11)       | x                  |
| B6                                                         | 1296.24            | 647.62             | 431.41             | x                        | x                  | x                  |
| B7                                                         | 1579.28            | 789.13             | 525.75             | x                        | x                  | x                  |
| B8                                                         | 1755.31            | 877.15             | 584.43             | x                        | x                  | x                  |
|                                                            |                    |                    |                    |                          |                    |                    |
|                                                            |                    |                    |                    |                          |                    |                    |
| Y0                                                         | 42.08              | 20.54              | 13.35              | x                        | x                  | x                  |
| Y1                                                         | 219.12             | 109.06             | 72.37              | x                        | x                  | x                  |
| Y2                                                         | 502.16             | 250.57             | 166.71             | x                        | x                  | x                  |
| Y3                                                         | 678.19             | 338.59             | 225.39             | x                        | x                  | x                  |
| Y4                                                         | 961.22             | 480.11             | 319.74             | x                        | x                  | x                  |
| Y5                                                         | 1137.26            | 568.12             | 378.41             | x                        | x                  | x                  |
| Y6                                                         | 1420.29            | 709.64             | 472.76             | x                        | x                  | x                  |
| Y7                                                         | 1596.32            | 797.66             | 531.44             | x                        | x                  | x                  |
|                                                            |                    |                    |                    |                          |                    |                    |
|                                                            |                    |                    |                    |                          |                    |                    |
| C1                                                         | 220.08             | 109.54             | 72.69              | x                        | x                  | x                  |
| C2                                                         | 396.11             | 197.55             | 131.37             | x                        | x                  | x                  |
| C3                                                         | 679.15             | 339.07             | 225.71             | x                        | x                  | x                  |
| C4                                                         | 855.18             | 427.09             | 284.39             | x                        | x                  | x                  |
| C5                                                         | 1138.22            | 568.61             | 378.73             | x                        | x                  | x                  |
| C6                                                         | 1314.25            | 656.62             | 437.41             | x                        | x                  | x                  |
| C7                                                         | 1597.29            | 798.14             | 531.76             | x                        | x                  | x                  |
| C8                                                         | 1773.32            | 886.16             | 590.43             | x                        | x                  | x                  |
|                                                            |                    |                    |                    |                          |                    |                    |
|                                                            |                    |                    |                    |                          |                    |                    |
| Z0                                                         | 25.08              | 12.03              | 7.69               | x                        | x                  | x                  |
| Z1                                                         | 201.11             | 100.05             | 66.36              | x                        | x                  | x                  |
| Z2                                                         | 484.15             | 241.57             | 160.71             | x                        | x                  | x                  |
| Z3                                                         | 660.18             | 329.58             | 219.39             | x                        | x                  | x                  |
| Z4                                                         | 943.21             | 471.10             | 313.73             | x                        | x                  | x                  |
| Z5                                                         | 1119.25            | 559.12             | 372.41             | x                        | x                  | x                  |
| Z6                                                         | 1402.28            | 700.64             | 466.76             | x                        | x                  | x                  |
| Z7                                                         | 1578.31            | 788.65             | 525.43             | x                        | x                  | x                  |

331 <sup>1</sup> Columns represent different charge states.

332 <sup>2</sup> Each CCS is an average of independent measurements with the corresponding standard deviation

333 **Supplementary Table 39.** CCS of B, Y, C and Z (-SO<sub>3</sub>) ions identified in an octa-saccharide GlcNAc6S-  
 334 G-GlcNAc6S-I-GlcNAc6S-G-GlcNAc6S-I-R<sub>2</sub> structure, where R<sub>2</sub> is C<sub>7</sub>H<sub>7</sub>O.

| #24                                                        |                    |                    |                    |                    |                    |                    |
|------------------------------------------------------------|--------------------|--------------------|--------------------|--------------------|--------------------|--------------------|
| GlcNAc6S-G-GlcNAc6S-I-GlcNAc6S-G-GlcNAc6S-I-R <sub>2</sub> |                    |                    |                    |                    |                    |                    |
|                                                            | - 1SO <sub>3</sub> | - 1SO <sub>3</sub> | - 1SO <sub>3</sub> | - 1SO <sub>3</sub> | - 1SO <sub>3</sub> | - 1SO <sub>3</sub> |
|                                                            | (1-) <sup>1</sup>  | (2-)               | (3-)               | (1-)               | (2-)               | (3-)               |
| B1                                                         | 202.07             | 100.53             | 66.69              | x                  | x                  | x                  |
| B2                                                         | 378.10             | 188.55             | 125.36             | 111.64 (0.2)       | x                  | x                  |
| B3                                                         | 661.14             | 330.07             | 219.71             | x                  | x                  | x                  |
| B4                                                         | 837.17             | 418.08             | 278.39             | x                  | x                  | x                  |
| B5                                                         | 1120.21            | 559.60             | 372.73             | x                  | 215.7 (0.6)        | x                  |
| B6                                                         | 1296.24            | 647.62             | 431.41             | x                  | x                  | x                  |
| B7                                                         | 1579.28            | 789.13             | 525.75             | x                  | x                  | x                  |
| B8                                                         | 1755.31            | 877.15             | 584.43             | x                  | x                  | x                  |
| Y0                                                         | 42.08              | 20.54              | 13.35              | x                  | x                  | x                  |
| Y1                                                         | 219.12             | 109.06             | 72.37              | x                  | x                  | x                  |
| Y2                                                         | 502.16             | 250.57             | 166.71             | x                  | x                  | x                  |
| Y3                                                         | 678.19             | 338.59             | 225.39             | x                  | x                  | x                  |
| Y4                                                         | 961.22             | 480.11             | 319.74             | x                  | x                  | x                  |
| Y5                                                         | 1137.26            | 568.12             | 378.41             | x                  | x                  | x                  |
| Y6                                                         | 1420.29            | 709.64             | 472.76             | x                  | x                  | x                  |
| Y7                                                         | 1596.32            | 797.66             | 531.44             | x                  | x                  | x                  |
| C1                                                         | 220.08             | 109.54             | 72.69              | x                  | x                  | x                  |
| C2                                                         | 396.11             | 197.55             | 131.37             | x                  | x                  | x                  |
| C3                                                         | 679.15             | 339.07             | 225.71             | x                  | x                  | x                  |
| C4                                                         | 855.18             | 427.09             | 284.39             | x                  | x                  | x                  |
| C5                                                         | 1138.22            | 568.61             | 378.73             | x                  | x                  | x                  |
| C6                                                         | 1314.25            | 656.62             | 437.41             | x                  | x                  | x                  |
| C7                                                         | 1597.29            | 798.14             | 531.76             | x                  | x                  | x                  |
| C8                                                         | 1773.32            | 886.16             | 590.43             | x                  | x                  | x                  |
| Z0                                                         | 25.08              | 12.03              | 7.69               | x                  | x                  | x                  |
| Z1                                                         | 201.11             | 100.05             | 66.36              | x                  | x                  | x                  |
| Z2                                                         | 484.15             | 241.57             | 160.71             | x                  | x                  | x                  |
| Z3                                                         | 660.18             | 329.58             | 219.39             | x                  | x                  | x                  |
| Z4                                                         | 943.21             | 471.10             | 313.73             | x                  | x                  | x                  |
| Z5                                                         | 1119.25            | 559.12             | 372.41             | x                  | x                  | x                  |
| Z6                                                         | 1402.28            | 700.64             | 466.76             | x                  | x                  | x                  |
| Z7                                                         | 1578.31            | 788.65             | 525.43             | x                  | x                  | x                  |

335 <sup>1</sup> Columns represent different charge states.

336 <sup>2</sup> Each CCS is an average of independent measurements with the corresponding standard deviation

337 **Supplementary Table 40.** CCS of B, Y, C and Z (-SO<sub>3</sub>) ions identified in a 9mer, G-GlcNS-G-GlcNS-I-  
 338 GlcNS-G-GlcNS-G-R<sub>3</sub> structure, where R<sub>3</sub> is C<sub>6</sub>H<sub>4</sub>NO<sub>2</sub>.

| #25                                              |                    |                    |                    |                           |              |      |
|--------------------------------------------------|--------------------|--------------------|--------------------|---------------------------|--------------|------|
| G-GlcNS-G-GlcNS-I-GlcNS-G-GlcNS-G-R <sub>3</sub> |                    |                    |                    |                           |              |      |
|                                                  | - 1SO <sub>3</sub> | - 1SO <sub>3</sub> | - 1SO <sub>3</sub> |                           |              |      |
|                                                  | (1-) <sup>1</sup>  | (2-)               | (3-)               | (1-)                      | (2-)         | (3-) |
| B1                                               | 95.07              | 47.03              | 31.02              | x                         | x            | x    |
| B2                                               | 336.09             | 167.54             | 111.36             | x                         | x            | x    |
| B3                                               | 512.13             | 255.56             | 170.04             | 132.30 (0.5) <sup>2</sup> | x            | x    |
| B4                                               | 753.15             | 376.07             | 250.38             | x                         | x            | x    |
| B5                                               | 929.18             | 464.09             | 309.06             | x                         | x            | x    |
| B6                                               | 1170.21            | 584.60             | 389.40             | x                         | 227.58 (0.2) | x    |
| B7                                               | 1346.24            | 672.62             | 448.07             | x                         | x            | x    |
| B8                                               | 1587.27            | 793.13             | 528.42             | x                         | x            | x    |
| B9                                               | 1763.30            | 881.15             | 587.09             | x                         | x            | x    |
| Y0                                               | 58.06              | 28.53              | 18.68              | x                         | x            | x    |
| Y1                                               | 234.09             | 116.54             | 77.36              | x                         | x            | x    |
| Y2                                               | 475.12             | 237.06             | 157.70             | x                         | x            | x    |
| Y3                                               | 651.15             | 325.07             | 216.38             | x                         | x            | x    |
| Y4                                               | 892.18             | 445.58             | 296.72             | x                         | x            | x    |
| Y5                                               | 1068.21            | 533.60             | 355.40             | x                         | x            | x    |
| Y6                                               | 1309.24            | 654.11             | 435.74             | x                         | x            | x    |
| Y7                                               | 1485.27            | 742.13             | 494.42             | x                         | x            | x    |
| Y8                                               | 1726.29            | 862.64             | 574.76             | x                         | x            | x    |
| C1                                               | 112.07             | 55.53              | 36.68              | x                         | x            | x    |
| C2                                               | 353.10             | 176.04             | 117.03             | x                         | x            | x    |
| C3                                               | 529.13             | 264.06             | 175.70             | x                         | x            | x    |
| C4                                               | 770.15             | 384.57             | 256.05             | x                         | x            | x    |
| C5                                               | 946.19             | 472.59             | 314.72             | x                         | x            | x    |
| C6                                               | 1187.21            | 593.10             | 395.07             | x                         | x            | x    |
| C7                                               | 1363.24            | 681.12             | 453.74             | x                         | x            | x    |
| C8                                               | 1604.27            | 801.63             | 534.08             | x                         | x            | x    |
| C9                                               | 1780.30            | 889.65             | 592.76             | x                         | x            | x    |
| Z0                                               | 40.05              | 19.52              | 12.68              | x                         | x            | x    |
| Z1                                               | 216.08             | 107.54             | 71.36              | x                         | x            | x    |
| Z2                                               | 457.11             | 228.05             | 151.70             | x                         | x            | x    |
| Z3                                               | 633.14             | 316.07             | 210.38             | x                         | x            | x    |
| Z4                                               | 874.17             | 436.58             | 290.72             | x                         | x            | x    |
| Z5                                               | 1050.20            | 524.60             | 349.39             | x                         | x            | x    |
| Z6                                               | 1291.22            | 645.11             | 429.74             | x                         | x            | x    |
| Z7                                               | 1467.26            | 733.12             | 488.41             | x                         | x            | x    |

|    |         |        |        |   |   |   |
|----|---------|--------|--------|---|---|---|
| Z8 | 1708.28 | 853.64 | 568.76 | x | x | x |
|----|---------|--------|--------|---|---|---|

339

340 <sup>1</sup> Columns represent different charge states.

341 <sup>2</sup> Each CCS is an average of independent measurements with the corresponding standard deviation

342

343

344

345

346

347

348

349

350



351 **Supplementary Table 41.** CCS of B, Y, C and Z (-SO<sub>3</sub>) ions identified in a dp9 + 1x2O-sulfate, G-  
 352 GlcNS-G-GlcNS-I2S-GlcNS-G-GlcNS-G-R<sub>3</sub> structure, where R<sub>3</sub> is C<sub>6</sub>H<sub>4</sub>NO<sub>2</sub>.

| #26                                                |                    |                    |                    |                          |                    |                    |
|----------------------------------------------------|--------------------|--------------------|--------------------|--------------------------|--------------------|--------------------|
| G-GlcNS-G-GlcNS-I2S-GlcNS-G-GlcNS-G-R <sub>3</sub> |                    |                    |                    |                          |                    |                    |
|                                                    | - 1SO <sub>3</sub> | - 1SO <sub>3</sub> | - 1SO <sub>3</sub> | - 1SO <sub>3</sub>       | - 1SO <sub>3</sub> | - 1SO <sub>3</sub> |
|                                                    | (1-) <sup>1</sup>  | (2-)               | (3-)               | (1-)                     | (2-)               | (3-)               |
| B1                                                 | 95.07              | 47.03              | 31.02              | x                        | x                  | x                  |
| B2                                                 | 336.09             | 167.54             | 111.36             | x                        | x                  | x                  |
| B3                                                 | 512.13             | 255.56             | 170.04             | 131.6 (0.5) <sup>2</sup> | x                  | x                  |
| B4                                                 | 753.15             | 376.07             | 250.38             | x                        | x                  | x                  |
| B5                                                 | 1009.14            | 504.07             | 335.71             | x                        | 234.21 (0.2)       | x                  |
| B6                                                 | 1250.17            | 624.58             | 416.05             | x                        | x                  | x                  |
| B7                                                 | 1426.20            | 712.59             | 474.73             | x                        | x                  | x                  |
| B8                                                 | 1667.22            | 833.11             | 555.07             | x                        | x                  | x                  |
| B9                                                 | 1843.25            | 921.12             | 613.75             | x                        | x                  | x                  |
|                                                    |                    |                    |                    |                          |                    |                    |
| Y0                                                 | 58.06              | 28.53              | 18.68              | x                        | x                  | x                  |
| Y1                                                 | 234.09             | 116.54             | 77.36              | x                        | x                  | x                  |
| Y2                                                 | 475.12             | 237.06             | 157.70             | x                        | x                  | x                  |
| Y3                                                 | 651.15             | 325.07             | 216.38             | x                        | x                  | x                  |
| Y4                                                 | 892.18             | 445.58             | 296.72             | x                        | x                  | x                  |
| Y5                                                 | 1148.17            | 573.58             | 382.05             | x                        | x                  | x                  |
| Y6                                                 | 1389.19            | 694.09             | 462.39             | x                        | x                  | x                  |
| Y7                                                 | 1565.22            | 782.11             | 521.07             | x                        | x                  | x                  |
| Y8                                                 | 1806.25            | 902.62             | 601.41             | x                        | x                  | x                  |
|                                                    |                    |                    |                    |                          |                    |                    |
|                                                    |                    |                    |                    |                          |                    |                    |
| C1                                                 | 112.07             | 55.53              | 36.68              | x                        | x                  | x                  |
| C2                                                 | 353.10             | 176.04             | 117.03             | x                        | x                  | x                  |
| C3                                                 | 529.13             | 264.06             | 175.70             | x                        | x                  | x                  |
| C4                                                 | 770.15             | 384.57             | 256.05             | x                        | x                  | x                  |
| C5                                                 | 1026.14            | 512.57             | 341.38             | x                        | x                  | x                  |
| C6                                                 | 1267.17            | 633.08             | 421.72             | x                        | x                  | x                  |
| C7                                                 | 1443.20            | 721.10             | 480.39             | x                        | x                  | x                  |
| C8                                                 | 1684.23            | 841.61             | 560.74             | x                        | x                  | x                  |
| C9                                                 | 1860.26            | 929.62             | 619.41             | x                        | x                  | x                  |
|                                                    |                    |                    |                    |                          |                    |                    |
| Z0                                                 | 40.05              | 19.52              | 12.68              | x                        | x                  | x                  |
| Z1                                                 | 216.08             | 107.54             | 71.36              | x                        | x                  | x                  |
| Z2                                                 | 457.11             | 228.05             | 151.70             | x                        | x                  | x                  |
| Z3                                                 | 633.14             | 316.07             | 210.38             | x                        | x                  | x                  |
| Z4                                                 | 874.17             | 436.58             | 290.72             | x                        | x                  | x                  |
| Z5                                                 | 1130.16            | 564.57             | 376.05             | x                        | x                  | x                  |
| Z6                                                 | 1371.18            | 685.09             | 456.39             | x                        | x                  | x                  |
| Z7                                                 | 1547.21            | 773.10             | 515.07             | x                        | x                  | x                  |

|    |         |        |        |   |   |   |
|----|---------|--------|--------|---|---|---|
| Z8 | 1788.24 | 893.62 | 595.41 | x | x | x |
|----|---------|--------|--------|---|---|---|

353

354 <sup>1</sup> Columns represent different charge states.

355 <sup>2</sup> Each CCS is an average of independent measurements with the corresponding standard deviation

356 **Supplementary Table 42.** CCS of B, Y, C and Z (-SO<sub>3</sub>) ions identified in a dp10 GlcNAc6S-[I-GlcNAc6S]<sub>4</sub>-I-R<sub>2</sub> structure, where R<sub>2</sub> is C<sub>7</sub>H<sub>7</sub>O.

| #27                                                  |                    |                    |                    |                    |                           |                    |                    |                    |
|------------------------------------------------------|--------------------|--------------------|--------------------|--------------------|---------------------------|--------------------|--------------------|--------------------|
| GlcNAc6S-[I-GlcNAc6S] <sub>4</sub> -I-R <sub>2</sub> |                    |                    |                    |                    |                           |                    |                    |                    |
|                                                      | - 1SO <sub>3</sub> | - 1SO <sub>3</sub> | - 1SO <sub>3</sub> | - 1SO <sub>3</sub> | - 1SO <sub>3</sub>        | - 1SO <sub>3</sub> | - 1SO <sub>3</sub> | - 1SO <sub>3</sub> |
|                                                      | (1-) <sup>1</sup>  | (2-)               | (3-)               | (4-)               | (1-)                      | (2-)               | (3-)               | (4-)               |
| B1                                                   | 202.07             | 100.53             | 66.69              | 49.76              | x                         | x                  | x                  | x                  |
| B2                                                   | 378.10             | 188.55             | 125.36             | 93.77              | 112.38 (0.2) <sup>2</sup> | x                  | x                  | x                  |
| B3                                                   | 661.14             | 330.07             | 219.71             | 164.53             | x                         | 167.6 (0.5)        | x                  | x                  |
| B4                                                   | 837.17             | 418.08             | 278.39             | 208.54             | x                         | x                  | x                  | x                  |
| B5                                                   | 1120.21            | 559.60             | 372.73             | 279.30             | x                         | 215.7 (0.2)        | 255.5 (0.4)        | x                  |
| B6                                                   | 1296.24            | 647.62             | 431.41             | 323.30             | x                         | x                  | 283.0 (0.5)        | x                  |
| B7                                                   | 1579.28            | 789.13             | 525.75             | 394.06             | x                         | x                  | x                  | x                  |
| B8                                                   | 1755.31            | 877.15             | 584.43             | 438.07             | x                         | x                  | x                  | x                  |
| B9                                                   | 2038.34            | 1018.67            | 678.78             | 508.83             | x                         | x                  | x                  | x                  |
| B10                                                  | 2214.38            | 1106.68            | 737.45             | 552.84             | x                         | x                  | x                  | x                  |
| Y0                                                   | 43.09              | 21.04              | 13.69              | 10.02              | x                         | x                  | x                  | x                  |
| Y1                                                   | 219.12             | 109.06             | 72.37              | 54.02              | x                         | x                  | x                  | x                  |
| Y2                                                   | 502.16             | 250.57             | 166.71             | 124.78             | x                         | x                  | x                  | x                  |
| Y3                                                   | 678.19             | 338.59             | 225.39             | 168.79             | x                         | x                  | x                  | x                  |
| Y4                                                   | 961.22             | 480.11             | 319.74             | 239.55             | x                         | x                  | x                  | x                  |
| Y5                                                   | 1137.26            | 568.12             | 378.41             | 283.56             | x                         | x                  | x                  | x                  |
| Y6                                                   | 1420.29            | 709.64             | 472.76             | 354.32             | x                         | x                  | x                  | x                  |
| Y7                                                   | 1596.32            | 797.66             | 531.44             | 398.33             | x                         | x                  | x                  | x                  |
| Y8                                                   | 1879.36            | 939.18             | 625.78             | 469.08             | x                         | x                  | x                  | x                  |
| Y9                                                   | 2055.39            | 1027.19            | 684.46             | 513.09             | x                         | x                  | x                  | x                  |
| C1                                                   | 220.08             | 109.54             | 72.69              | 54.26              | x                         | x                  | x                  | x                  |
| C2                                                   | 396.11             | 197.55             | 131.37             | 98.27              | x                         | x                  | x                  | x                  |
| C3                                                   | 679.15             | 339.07             | 225.71             | 169.03             | x                         | x                  | x                  | x                  |
| C4                                                   | 855.18             | 427.09             | 284.39             | 213.04             | x                         | x                  | x                  | x                  |
| C5                                                   | 1138.22            | 568.61             | 378.73             | 283.80             | x                         | x                  | x                  | x                  |

|     |         |         |        |        |   |   |   |   |
|-----|---------|---------|--------|--------|---|---|---|---|
| C6  | 1314.25 | 656.62  | 437.41 | 327.81 | x | x | x | x |
| C7  | 1597.29 | 798.14  | 531.76 | 398.57 | x | x | x | x |
| C8  | 1773.32 | 886.16  | 590.43 | 442.57 | x | x | x | x |
| C9  | 2056.35 | 1027.67 | 684.78 | 513.33 | x | x | x | x |
| C10 | 2232.39 | 1115.69 | 743.46 | 557.34 | x | x | x | x |
| Z0  | 25.08   | 12.03   | 7.69   | 5.51   | x | x | x | x |
| Z1  | 201.11  | 100.05  | 66.36  | 49.52  | x | x | x | x |
| Z2  | 484.15  | 241.57  | 160.71 | 120.28 | x | x | x | x |
| Z3  | 660.18  | 329.58  | 219.39 | 164.29 | x | x | x | x |
| Z4  | 943.21  | 471.10  | 313.73 | 235.05 | x | x | x | x |
| Z5  | 1119.25 | 559.12  | 372.41 | 279.06 | x | x | x | x |
| Z6  | 1402.28 | 700.64  | 466.76 | 349.81 | x | x | x | x |
| Z7  | 1578.31 | 788.65  | 525.43 | 393.82 | x | x | x | x |
| Z8  | 1861.35 | 930.17  | 619.78 | 464.58 | x | x | x | x |
| Z9  | 2037.38 | 1018.19 | 678.46 | 508.59 | x | x | x | x |

357

358 <sup>1</sup> Columns represent different charge states.

359 <sup>2</sup> Each CCS is an average of independent measurements with the corresponding standard deviation

360 **Supplementary Table 43.** CCS of B, Y, C and Z (-SO<sub>3</sub>) ions identified in a dp10 GlcNAc6S-[G-GlcNAc6S]<sub>4</sub>-G-R<sub>2</sub> structure, where R<sub>2</sub> is C<sub>7</sub>H<sub>7</sub>O.

| #28                                                  |                   |         |        |        |                          |             |             |      |
|------------------------------------------------------|-------------------|---------|--------|--------|--------------------------|-------------|-------------|------|
| GlcNAc6S-[G-GlcNAc6S] <sub>4</sub> -G-R <sub>2</sub> |                   |         |        |        |                          |             |             |      |
|                                                      | (1-) <sup>1</sup> | (2-)    | (3-)   | (4-)   | (1-)                     | (2-)        | (3-)        | (4-) |
| B1                                                   | 202.07            | 100.53  | 66.69  | 49.76  | x                        | x           | x           | x    |
| B2                                                   | 378.10            | 188.55  | 125.36 | 93.77  | 111.3 (0.2) <sup>2</sup> | x           | x           | x    |
| B3                                                   | 661.14            | 330.07  | 219.71 | 164.53 | 159.9 (0.2)              | x           | x           | x    |
| B4                                                   | 837.17            | 418.08  | 278.39 | 208.54 | x                        | x           | x           | x    |
| B5                                                   | 1120.21           | 559.60  | 372.73 | 279.30 | x                        | 214.4 (0.8) | x           | x    |
| B6                                                   | 1296.24           | 647.62  | 431.41 | 323.30 | x                        | x           | x           | x    |
| B7                                                   | 1579.28           | 789.13  | 525.75 | 394.06 | x                        | x           | 300.8 (0.5) | x    |
| B8                                                   | 1755.31           | 877.15  | 584.43 | 438.07 | x                        | x           | x           | x    |
| B9                                                   | 2038.34           | 1018.67 | 678.78 | 508.83 | x                        | x           | x           | x    |
| B10                                                  | 2214.38           | 1106.68 | 737.45 | 552.84 | x                        | x           | x           | x    |
| Y0                                                   | 43.09             | 21.04   | 13.69  | 10.02  | x                        | x           | x           | x    |
| Y1                                                   | 219.12            | 109.06  | 72.37  | 54.02  | x                        | x           | x           | x    |
| Y2                                                   | 502.16            | 250.57  | 166.71 | 124.78 | x                        | x           | x           | x    |
| Y3                                                   | 678.19            | 338.59  | 225.39 | 168.79 | x                        | x           | x           | x    |
| Y4                                                   | 961.22            | 480.11  | 319.74 | 239.55 | x                        | x           | x           | x    |
| Y5                                                   | 1137.26           | 568.12  | 378.41 | 283.56 | x                        | x           | x           | x    |
| Y6                                                   | 1420.29           | 709.64  | 472.76 | 354.32 | x                        | x           | x           | x    |
| Y7                                                   | 1596.32           | 797.66  | 531.44 | 398.33 | x                        | x           | x           | x    |
| Y8                                                   | 1879.36           | 939.18  | 625.78 | 469.08 | x                        | x           | x           | x    |
| Y9                                                   | 2055.39           | 1027.19 | 684.46 | 513.09 | x                        | x           | x           | x    |
| C1                                                   | 220.08            | 109.54  | 72.69  | 54.26  | x                        | x           | x           | x    |
| C2                                                   | 396.11            | 197.55  | 131.37 | 98.27  | x                        | x           | x           | x    |
| C3                                                   | 679.15            | 339.07  | 225.71 | 169.03 | x                        | x           | x           | x    |
| C4                                                   | 855.18            | 427.09  | 284.39 | 213.04 | x                        | x           | x           | x    |
| C5                                                   | 1138.22           | 568.61  | 378.73 | 283.80 | x                        | x           | x           | x    |

|     |         |         |        |        |   |   |   |   |
|-----|---------|---------|--------|--------|---|---|---|---|
| C6  | 1314.25 | 656.62  | 437.41 | 327.81 | x | x | x | x |
| C7  | 1597.29 | 798.14  | 531.76 | 398.57 | x | x | x | x |
| C8  | 1773.32 | 886.16  | 590.43 | 442.57 | x | x | x | x |
| C9  | 2056.35 | 1027.67 | 684.78 | 513.33 | x | x | x | x |
| C10 | 2232.39 | 1115.69 | 743.46 | 557.34 | x | x | x | x |
| Z0  | 25.08   | 12.03   | 7.69   | 5.51   | x | x | x | x |
| Z1  | 201.11  | 100.05  | 66.36  | 49.52  | x | x | x | x |
| Z2  | 484.15  | 241.57  | 160.71 | 120.28 | x | x | x | x |
| Z3  | 660.18  | 329.58  | 219.39 | 164.29 | x | x | x | x |
| Z4  | 943.21  | 471.10  | 313.73 | 235.05 | x | x | x | x |
| Z5  | 1119.25 | 559.12  | 372.41 | 279.06 | x | x | x | x |
| Z6  | 1402.28 | 700.64  | 466.76 | 349.81 | x | x | x | x |
| Z7  | 1578.31 | 788.65  | 525.43 | 393.82 | x | x | x | x |
| Z8  | 1861.35 | 930.17  | 619.78 | 464.58 | x | x | x | x |
| Z9  | 2037.38 | 1018.19 | 678.46 | 508.59 | x | x | x | x |

361

362 <sup>1</sup> Columns represent different charge states.

363 <sup>2</sup> Each CCS is an average of independent measurements with the corresponding standard deviation

364

365

366

367

368

369 **Supplementary Table 44.** CCS of B, Y, C and Z -SO<sub>3</sub> ions identified in disaccharide ΔUA2S-  
 370 GlcNS3S6S structure.

| #29             |                    |                    |                         |                    |
|-----------------|--------------------|--------------------|-------------------------|--------------------|
| ΔUA2S-GlcNS3S6S |                    |                    |                         |                    |
|                 | - 1SO <sub>3</sub> | - 1SO <sub>3</sub> | - 1SO <sub>3</sub>      | - 1SO <sub>3</sub> |
|                 | (1-) <sup>1</sup>  | (2-)               | (1-)                    | (2-)               |
| B1              | 157.01             | 78.00              | 69.4 (0.1) <sup>2</sup> | x                  |
| Y0              | 337.99             | 168.49             | x                       | 106 (0.5)          |
| C1              | 175.02             | 87.01              | x                       | x                  |
| Z0              | 319.97             | 159.48             | x                       | x                  |

371

372 <sup>1</sup> Columns represent different charge states.

373 <sup>2</sup> Each CCS is an average of independent measurements with the corresponding standard deviation

374

375

376 **Supplementary Table 45.** CCS of B, Y, C and Z -SO<sub>3</sub> ions identified in tetraaccharide ΔUA-GlcNS-  
 377 IdoA2S-GlcNS3S structure.

| #30                      |                    |                    |                         |                    |
|--------------------------|--------------------|--------------------|-------------------------|--------------------|
| ΔUA-GlcNS-IdoA2S-GlcNS3S |                    |                    |                         |                    |
|                          | - 1SO <sub>3</sub> | - 1SO <sub>3</sub> | - 1SO <sub>3</sub>      | - 1SO <sub>3</sub> |
|                          | (1-) <sup>1</sup>  | (2-)               | (1-)                    | (2-)               |
| B1                       | 77.06              | 38.02              | x                       | x                  |
| B2                       | 318.08             | 158.54             | 99.5 (0.5) <sup>2</sup> | x                  |
| B3                       | 574.07             | 286.53             | 141.4 (0.1)             | 150.5 (0.1)        |
| Y0                       | 258.03             | 128.51             | 85.3 (0.1)              | x                  |
| Y1                       | 514.02             | 256.50             | x                       | 133.0 (0.5)        |
| Y2                       | 755.04             | 377.02             | x                       | 172.8 (0.1)        |
| C1                       | 95.07              | 47.03              | x                       | x                  |
| C2                       | 336.09             | 167.54             | x                       | x                  |
| C3                       | 592.08             | 295.54             | x                       | 148.5 (0.4)        |

378

379 <sup>1</sup> Columns represent different charge states.

380 <sup>2</sup> Each CCS is an average of independent measurements with the corresponding standard deviation

381

382



383 **Supplementary Table 46.** CCS of B, Y, C and Z -SO<sub>3</sub> ions identified in tetrasaccharide ΔUA-GlcNS6S-  
 384 GlcA-GlcNS3S6S structure.

| #31                    |                    |                    |                          |                    |
|------------------------|--------------------|--------------------|--------------------------|--------------------|
| UA-GlcNS6S-G-GlcNS3S6S |                    |                    |                          |                    |
|                        | - 1SO <sub>3</sub> | - 1SO <sub>3</sub> | - 1SO <sub>3</sub>       | - 1SO <sub>3</sub> |
|                        | (1-) <sup>1</sup>  | (2-)               | (1-)                     | (2-)               |
| B1                     | 77.06              | 38.02              | x                        | x                  |
| B2                     | 398.04             | 198.52             | x                        | x                  |
| B3                     | 574.07             | 286.53             | 140.9 (0.5) <sup>2</sup> | 151.1 (0.3)        |
| Y0                     | 337.99             | 168.49             | x                        | 105.8 (0.3)        |
| Y1                     | 514.02             | 256.50             | x                        | 133.5 (0.5)        |
| Y2                     | 835.00             | 417.00             | x                        | x                  |
| C1                     | 95.07              | 47.03              | x                        | x                  |
| C2                     | 416.05             | 207.52             | x                        | x                  |
| C3                     | 592.08             | 295.54             | 133.5 (0.5)              | x                  |
| Z0                     | 319.97             | 159.48             | x                        | x                  |
| Z1                     | 496.01             | 247.50             | x                        | x                  |
| Z2                     | 816.99             | 407.99             | x                        | x                  |

385

386 <sup>1</sup> Columns represent different charge states.

387 <sup>2</sup> Each CCS is an average of independent measurements with the corresponding standard deviation

388

389

390 **Supplementary Table 47.** CCS of B, Y, C and Z -SO<sub>3</sub> ions identified in tetrasaccharide ΔUA-  
 391 GlcNAc6S-GlcA-GlcNS3S6S structure.

| #32                         |                    |                    |                          |                    |
|-----------------------------|--------------------|--------------------|--------------------------|--------------------|
| ΔUA-GlcNAc6S-GlcA-GlcNS3S6S |                    |                    |                          |                    |
|                             | - 1SO <sub>3</sub> | - 1SO <sub>3</sub> | - 1SO <sub>3</sub>       | - 1SO <sub>3</sub> |
|                             | (1-) <sup>1</sup>  | (2-)               | (1-)                     | (2-)               |
| B1                          | 77.06              | 38.02              | x                        | x                  |
| B2                          | 360.09             | 179.54             | x                        | x                  |
| B3                          | 536.13             | 267.56             | 136.7 (0.2) <sup>2</sup> | x                  |
| Y0                          | 337.99             | 168.49             | x                        | x                  |
| Y1                          | 514.02             | 256.50             | x                        | x                  |
| Y2                          | 797.05             | 398.02             | x                        | x                  |
| C1                          | 95.07              | 47.03              | x                        | x                  |
| C2                          | 378.10             | 188.55             | x                        | x                  |
| C3                          | 554.14             | 276.56             | 138.13 (0.2)             | x                  |
| Z0                          | 319.97             | 159.48             | x                        | x                  |
| Z1                          | 496.01             | 247.50             | x                        | x                  |
| Z2                          | 779.04             | 389.02             | x                        | x                  |

392

393 <sup>1</sup> Columns represent different charge states.

394 <sup>2</sup> Each CCS is an average of independent measurements with the corresponding standard deviation

395

396 **Supplementary Table 48.** CCS of B, Y, C and Z (-SO<sub>3</sub>) ions identified in a hexasaccharide G-GlcNS6S-  
 397 G-GlcNS6S-I2S-GlcNS6S-R<sub>1</sub> structure, where R<sub>1</sub> is (CH<sub>2</sub>)<sub>5</sub>NH<sub>2</sub>.  
 398

| #33                                            |                    |                    |                    |                    |                          |                    |
|------------------------------------------------|--------------------|--------------------|--------------------|--------------------|--------------------------|--------------------|
| G-GlcNS6S-G-GlcNS6S-I2S-GlcNS6S-R <sub>1</sub> |                    |                    |                    |                    |                          |                    |
|                                                | - 1SO <sub>3</sub> | - 1SO <sub>3</sub> | - 1SO <sub>3</sub> | - 1SO <sub>3</sub> | - 1SO <sub>3</sub>       | - 1SO <sub>3</sub> |
|                                                | (1-) <sup>1</sup>  | (2-)               | (3-)               | (1-)               | (2-)                     | (3-)               |
| B1                                             | 95.07              | 47.03              | 31.02              | x                  | x                        | x                  |
| B2                                             | 416.05             | 207.52             | 138.01             | x                  | 122.2 (0.6) <sup>2</sup> | x                  |
| B3                                             | 592.08             | 295.54             | 196.69             | x                  | 152.5 (0.2)              | x                  |
| B4                                             | 913.06             | 456.03             | 303.68             | x                  | x                        | 216.5 (0.3)        |
| B5                                             | 1169.05            | 584.02             | 389.01             | x                  | x                        | x                  |
| B6                                             | 1490.04            | 744.51             | 496.01             | x                  | x                        | x                  |
| Y0                                             | 22.14              | 10.56              | 6.71               | x                  | x                        | x                  |
| Y1                                             | 343.12             | 171.05             | 113.70             | 109.1 (0.3)        | x                        | x                  |
| Y2                                             | 599.11             | 299.05             | 199.03             | x                  | 157.0 (0.2)              | x                  |
| Y3                                             | 920.09             | 459.54             | 306.02             | x                  | x                        | x                  |
| Y4                                             | 1096.12            | 547.56             | 364.70             | x                  | x                        | 246.3 (0.6)        |
| Y5                                             | 1417.10            | 708.05             | 471.70             | x                  | x                        | x                  |
| C1                                             | 113.08             | 56.04              | 37.02              | x                  | x                        | x                  |
| C2                                             | 434.06             | 216.53             | 144.01             | x                  | x                        | x                  |
| C3                                             | 610.09             | 304.54             | 202.69             | x                  | x                        | x                  |
| C4                                             | 931.07             | 465.03             | 309.69             | x                  | x                        | x                  |
| C5                                             | 1187.06            | 593.03             | 395.02             | x                  | x                        | x                  |
| C6                                             | 1508.05            | 753.52             | 502.01             | x                  | x                        | x                  |
| Z0                                             | 4.12               | 1.56               | 0.70               | x                  | x                        | x                  |
| Z1                                             | 325.11             | 162.05             | 107.70             | x                  | x                        | x                  |
| Z2                                             | 581.10             | 290.04             | 193.03             | x                  | x                        | x                  |
| Z3                                             | 902.08             | 450.54             | 300.02             | x                  | x                        | x                  |
| Z4                                             | 1078.11            | 538.55             | 358.70             | x                  | x                        | x                  |
| Z5                                             | 1399.09            | 699.04             | 465.69             | x                  | x                        | x                  |

399

400 <sup>1</sup> Columns represent different charge states.

401 <sup>2</sup> Each CCS is an average of independent measurements with the corresponding standard deviation

402

403

404

405 **Supplementary Table 49.** CCS of B, Y, C and Z (-SO<sub>3</sub>) ions identified in a hexasaccharide G-GlcNS6S-  
 406 G-GlcNS3S-I2S-GlcNS6S-R<sub>1</sub> structure, where R<sub>1</sub> is (CH<sub>2</sub>)<sub>5</sub>NH<sub>2</sub>.  
 407

| #34                                            |                    |                    |                    |                    |                          |                    |
|------------------------------------------------|--------------------|--------------------|--------------------|--------------------|--------------------------|--------------------|
| G-GlcNS6S-G-GlcNS3S-I2S-GlcNS6S-R <sub>1</sub> |                    |                    |                    |                    |                          |                    |
|                                                | - 1SO <sub>3</sub> | - 1SO <sub>3</sub> | - 1SO <sub>3</sub> | - 1SO <sub>3</sub> | - 1SO <sub>3</sub>       | - 1SO <sub>3</sub> |
|                                                | (1-) <sup>1</sup>  | (2-)               | (3-)               | (1-)               | (2-)                     | (3-)               |
| B1                                             | 95.07              | 47.03              | 31.02              | x                  | x                        | x                  |
| B2                                             | 416.05             | 207.52             | 138.01             | x                  | 121.8 (0.4) <sup>2</sup> | x                  |
| B3                                             | 592.08             | 295.54             | 196.69             | 139.1 (0.3)        | X                        | x                  |
| B4                                             | 913.06             | 456.03             | 303.68             | x                  | x                        | x                  |
| B5                                             | 1169.05            | 584.02             | 389.01             | x                  | x                        | x                  |
| B6                                             | 1490.04            | 744.51             | 496.01             | x                  | x                        | x                  |
| Y0                                             | 22.14              | 10.56              | 6.71               | x                  | x                        | x                  |
| Y1                                             | 343.12             | 171.05             | 113.70             | 109.5 (0.3)        | x                        | x                  |
| Y2                                             | 599.11             | 299.05             | 199.03             | x                  | 156.4 (0.1)              | x                  |
| Y3                                             | 920.09             | 459.54             | 306.02             | x                  | x                        | x                  |
| Y4                                             | 1096.12            | 547.56             | 364.70             | x                  | 209.9 (0.5)              | x                  |
| Y5                                             | 1417.10            | 708.05             | 471.70             | x                  | x                        | x                  |
| C1                                             | 113.08             | 56.04              | 37.02              | x                  | x                        | x                  |
| C2                                             | 434.06             | 216.53             | 144.01             | x                  | x                        | x                  |
| C3                                             | 610.09             | 304.54             | 202.69             | x                  | x                        | x                  |
| C4                                             | 931.07             | 465.03             | 309.69             | x                  | x                        | x                  |
| C5                                             | 1187.06            | 593.03             | 395.02             | x                  | x                        | x                  |
| C6                                             | 1508.05            | 753.52             | 502.01             | x                  | x                        | x                  |
| Z0                                             | 4.12               | 1.56               | 0.70               | x                  | x                        | x                  |
| Z1                                             | 325.11             | 162.05             | 107.70             | x                  | x                        | x                  |
| Z2                                             | 581.10             | 290.04             | 193.03             | x                  | x                        | x                  |
| Z3                                             | 902.08             | 450.54             | 300.02             | x                  | x                        | x                  |
| Z4                                             | 1078.11            | 538.55             | 358.70             | x                  | x                        | x                  |
| Z5                                             | 1399.09            | 699.04             | 465.69             | x                  | x                        | x                  |

408

409 <sup>1</sup> Columns represent different charge states.

410 <sup>2</sup> Each CCS is an average of independent measurements with the corresponding standard deviation

411

412

413

414 **Supplementary Table 50.** CCS of B, Y, C and Z (-SO<sub>3</sub>) ions identified in a hexasaccharide G-GlcNS6S-  
 415 G-GlcNS6S3S-I2S-GlcNS6S-R<sub>1</sub> structure, where R<sub>1</sub> is (CH<sub>2</sub>)<sub>5</sub>NH<sub>2</sub>.  
 416

| #35                                              |                    |                    |                    |                    |                    |                    |
|--------------------------------------------------|--------------------|--------------------|--------------------|--------------------|--------------------|--------------------|
| G-GlcNS6S-G-GlcNS6S3S-I2S-GlcNS6S-R <sub>1</sub> |                    |                    |                    |                    |                    |                    |
|                                                  | - 1SO <sub>3</sub> | - 1SO <sub>3</sub> | - 1SO <sub>3</sub> | - 1SO <sub>3</sub> | - 1SO <sub>3</sub> | - 1SO <sub>3</sub> |
|                                                  | (1-) <sup>1</sup>  | (2-)               | (3-)               | (1-)               | (2-)               | (3-)               |
| B1                                               | 95.07              | 47.03              | 31.02              | x                  | x                  | x                  |
| B2                                               | 416.05             | 207.52             | 138.01             | x                  | 122.4 (0.2)        | x                  |
| B3                                               | 592.08             | 295.54             | 196.69             | 139.3 (0.3)        | x                  | x                  |
| B4                                               | 993.02             | 496.01             | 330.34             | x                  | x                  | x                  |
| B5                                               | 1249.01            | 624.00             | 415.66             | x                  | x                  | x                  |
| B6                                               | 1569.99            | 784.49             | 522.66             | x                  | x                  | x                  |
| Y0                                               | 22.14              | 10.56              | 6.71               | x                  | x                  | x                  |
| Y1                                               | 343.12             | 171.05             | 113.70             | 109.8 (0.2)        | x                  | x                  |
| Y2                                               | 599.11             | 299.05             | 199.03             | x                  | x                  | x                  |
| Y3                                               | 1000.05            | 499.52             | 332.68             | x                  | x                  | x                  |
| Y4                                               | 1176.08            | 587.53             | 391.35             | x                  | x                  | 242.3 (0.5)        |
| Y5                                               | 1497.06            | 748.03             | 498.35             | x                  | x                  | x                  |
| C1                                               | 113.08             | 56.04              | 37.02              | x                  | x                  | x                  |
| C2                                               | 434.06             | 216.53             | 144.01             | x                  | x                  | x                  |
| C3                                               | 610.09             | 304.54             | 202.69             | x                  | x                  | x                  |
| C4                                               | 1011.03            | 505.01             | 336.34             | x                  | x                  | x                  |
| C5                                               | 1267.02            | 633.01             | 421.67             | x                  | x                  | x                  |
| C6                                               | 1588.00            | 793.50             | 528.66             | x                  | x                  | x                  |
| Z0                                               | 4.12               | 1.56               | 0.70               | x                  | x                  | x                  |
| Z1                                               | 325.11             | 162.05             | 107.70             | x                  | x                  | x                  |
| Z2                                               | 581.10             | 290.04             | 193.03             | x                  | x                  | x                  |
| Z3                                               | 982.03             | 490.51             | 326.67             | x                  | x                  | x                  |
| Z4                                               | 1158.07            | 578.53             | 385.35             | x                  | x                  | x                  |
| Z5                                               | 1479.05            | 739.02             | 492.34             | x                  | x                  | x                  |

417

418 <sup>1</sup> Columns represent different charge states.

419 <sup>2</sup> Each CCS is an average of independent measurements with the corresponding standard deviation

420

421

422 **Supplementary Table 51.** CCS of B, Y, C and Z (-SO<sub>3</sub>) ions identified in a septa-saccharide G-GlcNS-  
 423 G-GlcNS-I2S-GlcNS-G-GlcNS-G-R<sub>3</sub> structure.  
 424

| #36                                                |                    |                    |                    |                    |                    |                    |
|----------------------------------------------------|--------------------|--------------------|--------------------|--------------------|--------------------|--------------------|
| G-GlcNS-G-GlcNS-I2S-GlcNS-G-GlcNS-G-R <sub>3</sub> |                    |                    |                    |                    |                    |                    |
|                                                    | - 1SO <sub>3</sub> | - 1SO <sub>3</sub> | - 1SO <sub>3</sub> | - 1SO <sub>3</sub> | - 1SO <sub>3</sub> | - 1SO <sub>3</sub> |
|                                                    | (1-) <sup>1</sup>  | (2-)               | (3-)               | (1-)               | (2-)               | (3-)               |
| B1                                                 | 77.06              | 38.02              | 25.01              | x                  | x                  | x                  |
| B2                                                 | 318.08             | 158.54             | 105.36             | x                  | x                  | x                  |
| B3                                                 | 574.07             | 286.53             | 190.69             | x                  | x                  | x                  |
| B4                                                 | 815.10             | 407.04             | 271.03             | x                  | x                  | x                  |
| B5                                                 | 991.13             | 495.06             | 329.70             | x                  | x                  | x                  |
| B6                                                 | 1232.15            | 615.57             | 410.05             | x                  | x                  | x                  |
| B7                                                 | 1408.19            | 703.59             | 468.72             | x                  | x                  | x                  |
| B8                                                 | 1546.21            | 772.60             | 514.73             | x                  | x                  | x                  |
|                                                    |                    |                    |                    |                    |                    |                    |
| Y0                                                 | 58.06              | 28.53              | 18.68              | x                  | x                  | x                  |
| Y1                                                 | 234.09             | 116.54             | 77.36              | x                  | x                  | x                  |
| Y2                                                 | 475.12             | 237.06             | 157.70             | x                  | x                  | x                  |
| Y3                                                 | 651.15             | 325.07             | 216.38             | x                  | x                  | x                  |
| Y4                                                 | 892.18             | 445.58             | 296.72             | x                  | x                  | x                  |
| Y5                                                 | 1148.17            | 573.58             | 382.05             | x                  | x                  | x                  |
| Y6                                                 | 1389.19            | 694.09             | 462.39             | x                  | x                  | x                  |
| Y7                                                 | 1547.21            | 773.10             | 515.07             | x                  | x                  | x                  |
|                                                    |                    |                    |                    |                    |                    |                    |
| C1                                                 | 94.06              | 46.53              | 30.68              | x                  | x                  | x                  |
| C2                                                 | 335.09             | 167.04             | 111.02             | x                  | x                  | x                  |
| C3                                                 | 591.07             | 295.03             | 196.35             | x                  | x                  | x                  |
| C4                                                 | 832.10             | 415.55             | 276.69             | x                  | x                  | x                  |
| C5                                                 | 1008.13            | 503.56             | 335.37             | x                  | x                  | x                  |
| C6                                                 | 1249.16            | 624.07             | 415.71             | x                  | x                  | x                  |
| C7                                                 | 1425.19            | 712.09             | 474.39             | x                  | x                  | x                  |
| C8                                                 | 1563.21            | 781.10             | 520.40             | x                  | x                  | x                  |
|                                                    |                    |                    |                    |                    |                    |                    |
| Z0                                                 | 40.05              | 19.52              | 12.68              | x                  | x                  | x                  |
| Z1                                                 | 216.08             | 107.54             | 71.36              | x                  | x                  | x                  |
| Z2                                                 | 457.11             | 228.05             | 151.70             | x                  | x                  | x                  |
| Z3                                                 | 633.14             | 316.07             | 210.38             | x                  | x                  | x                  |
| Z4                                                 | 874.17             | 436.58             | 290.72             | x                  | x                  | x                  |
| Z5                                                 | 1130.16            | 564.57             | 376.05             | x                  | x                  | x                  |
| Z6                                                 | 1371.18            | 685.09             | 456.39             | x                  | x                  | x                  |
| Z7                                                 | 1546.21            | 772.60             | 514.73             | x                  | x                  | x                  |

425 <sup>1</sup> Columns represent different charge states.

426 <sup>2</sup> Each CCS is an average of independent measurements with the corresponding standard deviation

427 **Supplementary Table 52.** Summary of B, Y, C and Z ions theoretically identified from one of the six  
 428 possible hexasaccharide sequences (dp6 + 3SO<sub>3</sub> + 1NAc) as a result of one glycosidic bond cleavage in  
 429 the structure ΔUA-GlcNS-UA-GlcNAc-UA2S-GlcNS.

430

| ΔUA-GlcNS-UA-GlcNAc-UA2S-GlcNS |          |         |       |      |
|--------------------------------|----------|---------|-------|------|
|                                | (1-)     | (2-)    | (1-)  | (2-) |
| B1                             | 157.014  | 78.003  | ✓     | x    |
| B2                             | 398.039  | 198.516 | x     | ✓    |
| B3                             | 574.071  | 286.532 | ✓     | ✓    |
| B4                             | 777.151  | 388.071 | x     | x    |
| B5                             | 1033.140 | 516.066 | x     | x    |
| Y0                             | 258.028  | 128.510 | x     | x    |
| Y1                             | 514.017  | 256.505 | x     | x    |
| Y2                             | 717.097  | 358.044 | x     | x    |
| Y3                             | 893.129  | 446.060 | x     | x    |
| Y4                             | 1134.154 | 566.573 | x     | x    |
| C1                             | 175.024  | 87.008  | ✓     | x    |
| C2                             | 416.050  | 207.521 | ✓     | ✓    |
| C3                             | 592.082  | 295.537 | ✓     | ✓    |
| C4                             | 795.161  | 397.077 | x     | x    |
| C5                             | 1051.150 | 525.071 | x     | x    |
| Z0                             | 240.018  | 119.505 | ✓     | x    |
| Z1                             | 496.007  | 247.499 | x     | ✓    |
| Z2                             | 699.086  | 349.039 | x     | x    |
| Z3                             | 875.118  | 437.055 | x     | x    |
| Z4                             | 1116.144 | 557.568 | x     | x    |
|                                |          |         | Total | 8    |

431  
 432  
 433  
 434  
 435  
 436  
 437  
 438

439 **Supplementary Table 53.** Summary of B, Y, C and Z ions theoretically identified from one of the six  
 440 possible hexasaccharide sequences (dp6 + 3SO<sub>3</sub> + 1NAc) as a result of one glycosidic bond cleavage in  
 441 the structure ΔUA-GlcNS-UA2S-GlcNS-UA-GlcNAc.  
 442

| ΔUA-GlcNS-UA2S-GlcNS-UA-GlcNAc |          |         |       |      |
|--------------------------------|----------|---------|-------|------|
|                                | (1-)     | (2-)    | (1-)  | (2-) |
| B1                             | 157.014  | 78.003  | ✓     | x    |
| B2                             | 398.039  | 198.516 | ✓     | ✓    |
| B3                             | 654.028  | 326.510 | x     | ✓    |
| B4                             | 895.054  | 447.023 | x     | x    |
| B5                             | 1071.086 | 535.039 | x     | ✓    |
|                                |          |         |       |      |
| Y0                             | 220.082  | 109.537 | x     | x    |
| Y1                             | 396.114  | 197.553 | ✓     | x    |
| Y2                             | 637.140  | 318.066 | ✓     | x    |
| Y3                             | 893.129  | 446.060 | x     | ✓    |
| Y4                             | 1134.154 | 566.573 | x     | x    |
|                                |          |         |       |      |
| C1                             | 175.024  | 87.008  | ✓     | x    |
| C2                             | 416.050  | 207.521 | ✓     | ✓    |
| C3                             | 672.039  | 335.515 | x     | x    |
| C4                             | 913.064  | 456.028 | x     | x    |
| C5                             | 1089.096 | 544.044 | x     | x    |
|                                |          |         |       |      |
| Z0                             | 202.072  | 100.532 | x     | x    |
| Z1                             | 378.104  | 188.548 | ✓     | x    |
| Z2                             | 619.129  | 309.061 | ✓     | x    |
| Z3                             | 875.118  | 437.055 | x     | x    |
| Z4                             | 1116.144 | 557.568 | x     | x    |
|                                |          |         |       |      |
|                                |          |         | Total | 11   |

443



444 **Supplementary Table 54.** Summary of B, Y, C and Z ions theoretically identified from one of the six  
 445 possible hexasaccharide sequences (dp6 + 3SO<sub>3</sub> + 1NAc) as a result of one glycosidic bond cleavage in  
 446 the structure ΔUA-GlcNAc-UA-GlcNS-UA2S-GlcNS  
 447

| ΔUA-GlcNAc-UA-GlcNS-UA2S-GlcNS |          |         |       |      |
|--------------------------------|----------|---------|-------|------|
|                                | (1-)     | (2-)    | (1-)  | (2-) |
| B1                             | 157.014  | 78.003  | ✓     | x    |
| B2                             | 360.093  | 179.543 | x     | x    |
| B3                             | 536.125  | 267.559 | ✓     | x    |
| B4                             | 777.151  | 388.071 | x     | x    |
| B5                             | 1033.140 | 516.066 | x     | x    |
| Y0                             | 258.028  | 128.510 | x     | x    |
| Y1                             | 514.017  | 256.505 | x     | x    |
| Y2                             | 755.043  | 377.017 | x     | x    |
| Y3                             | 931.075  | 465.034 | x     | x    |
| Y4                             | 1134.154 | 566.573 | x     | x    |
| C1                             | 175.024  | 87.008  | ✓     | x    |
| C2                             | 378.104  | 188.548 | ✓     | x    |
| C3                             | 554.136  | 276.564 | x     | x    |
| C4                             | 795.161  | 397.077 | x     | x    |
| C5                             | 1051.150 | 525.071 | x     | x    |
| Z0                             | 240.018  | 119.505 | ✓     | x    |
| Z1                             | 496.007  | 247.499 | x     | ✓    |
| Z2                             | 737.032  | 368.012 | x     | x    |
| Z3                             | 913.064  | 456.028 | x     | x    |
| Z4                             | 1116.144 | 557.568 | x     | x    |
|                                |          |         | Total | 6    |

448

449

450 **Supplementary Table 55.** Summary of B, Y, C and Z ions theoretically identified from one of the six  
 451 possible hexasaccharide sequences (dp6 + 3SO<sub>3</sub> + 1NAc) as a result of one glycosidic bond cleavage in  
 452 the structure ΔUA-GlcNAc-UA2S-GlcNS-UA-GlcNS.  
 453

| ΔUA-GlcNAc-UA2S-GlcNS-UA-GlcNS |          |         |       |      |
|--------------------------------|----------|---------|-------|------|
|                                | (1-)     | (2-)    | (1-)  | (2-) |
| B1                             | 157.014  | 78.003  | ✓     | x    |
| B2                             | 360.093  | 179.543 | x     | x    |
| B3                             | 616.082  | 307.537 | x     | ✓    |
| B4                             | 857.107  | 428.050 | x     | x    |
| B5                             | 1033.140 | 516.066 | x     | x    |
| Y0                             | 258.028  | 128.510 | x     | x    |
| Y1                             | 434.060  | 216.526 | x     | x    |
| Y2                             | 675.086  | 337.039 | x     | x    |
| Y3                             | 931.075  | 465.034 | x     | x    |
| Y4                             | 1134.154 | 566.573 | x     | x    |
| C1                             | 175.024  | 87.008  | ✓     | x    |
| C2                             | 378.104  | 188.548 | ✓     | x    |
| C3                             | 634.092  | 316.542 | x     | x    |
| C4                             | 875.118  | 437.055 | x     | x    |
| C5                             | 1051.150 | 525.071 | x     | x    |
| Z0                             | 240.018  | 119.505 | ✓     | x    |
| Z1                             | 416.050  | 207.521 | ✓     | ✓    |
| Z2                             | 657.075  | 328.034 | ✓     | ✓    |
| Z3                             | 913.064  | 456.028 | x     | x    |
| Z4                             | 1116.144 | 557.568 | x     | x    |
|                                |          |         | Total | 7    |

454  
 455  
 456  
 457

458 **Supplementary Table 56.** Summary of B, Y, C and Z ions theoretically identified from one of the six  
 459 possible hexasaccharide sequences (dp6 + 3SO<sub>3</sub> + 1NAc) as a result of one glycosidic bond cleavage in  
 460 the structure ΔUA2S-GlcNS-UA-GlcNS-UA-GlcNAc.  
 461

| ΔUA2S-GlcNS-UA-GlcNS-UA-GlcNAc |          |         |       |      |
|--------------------------------|----------|---------|-------|------|
|                                | (1-)     | (2-)    | (1-)  | (2-) |
| B1                             | 236.970  | 117.981 | x     | x    |
| B2                             | 477.996  | 238.494 | x     | x    |
| B3                             | 654.028  | 326.510 | x     | ✓    |
| B4                             | 895.054  | 447.023 | x     | x    |
| B5                             | 1071.086 | 535.039 | x     | x    |
|                                |          |         |       |      |
| Y0                             | 220.082  | 109.537 | x     | x    |
| Y1                             | 396.114  | 197.553 | ✓     | x    |
| Y2                             | 637.140  | 318.066 | ✓     | x    |
| Y3                             | 813.172  | 406.082 | x     | ✓    |
| Y4                             | 1054.197 | 526.595 | x     | ✓    |
|                                |          |         |       |      |
| C1                             | 254.981  | 126.987 | x     | x    |
| C2                             | 496.007  | 247.499 | x     | ✓    |
| C3                             | 672.039  | 335.515 | x     | x    |
| C4                             | 913.064  | 456.028 | x     | x    |
| C5                             | 1089.096 | 544.044 | x     | x    |
|                                |          |         |       |      |
| Z0                             | 202.072  | 100.532 | x     | x    |
| Z1                             | 378.104  | 188.548 | ✓     | x    |
| Z2                             | 619.129  | 309.061 | ✓     | x    |
| Z3                             | 795.161  | 397.077 | x     | x    |
| Z4                             | 1036.187 | 517.590 | x     | x    |
|                                |          |         | Total | 8    |

462  
 463  
 464  
 465  
 466

467 **Supplementary Table 57.** Summary of B, Y, C and Z ions theoretically identified from one of the six  
 468 possible hexasaccharide sequences (dp6 + 3SO<sub>3</sub> + 1NAc) as a result of one glycosidic bond cleavage in  
 469 the structure ΔUA2S-GlcNS-UA-GlcNAc-UA-GlcNS.  
 470

| ΔUA2S-GlcNS-UA-GlcNAc-UA-GlcNS |          |         |       |      |
|--------------------------------|----------|---------|-------|------|
|                                | (1-)     | (2-)    | (1-)  | (2-) |
| B1                             | 236.970  | 117.981 | x     | x    |
| B2                             | 477.996  | 238.494 | x     | x    |
| B3                             | 654.028  | 326.510 | x     | ✓    |
| B4                             | 857.107  | 428.050 | x     | x    |
| B5                             | 1033.140 | 516.066 | x     | x    |
| Y0                             | 258.028  | 128.510 | x     | x    |
| Y1                             | 434.060  | 216.526 | x     | x    |
| Y2                             | 637.140  | 318.066 | ✓     | x    |
| Y3                             | 813.172  | 406.082 | x     | ✓    |
| Y4                             | 1054.197 | 526.595 | x     | ✓    |
| C1                             | 254.981  | 126.987 | x     | x    |
| C2                             | 496.007  | 247.499 | x     | ✓    |
| C3                             | 672.039  | 335.515 | x     | x    |
| C4                             | 875.118  | 437.055 | x     | x    |
| C5                             | 1051.150 | 525.071 | x     | x    |
| Z0                             | 240.018  | 119.505 | ✓     | x    |
| Z1                             | 416.050  | 207.521 | ✓     | ✓    |
| Z2                             | 619.129  | 309.061 | ✓     | x    |
| Z3                             | 795.161  | 397.077 | x     | x    |
| Z4                             | 1036.187 | 517.590 | x     | x    |
|                                |          |         | Total | 9    |

471  
 472  
 473

474 **Supplementary Table 58.** Summary overview of the B, Y, C and Z ions theoretically identified from one  
475 glycosidic bond cleavage in the purified hexasaccharide.

476  
477

| Possible structures                                 | B/C/Y/Z ions |
|-----------------------------------------------------|--------------|
| $\Delta$ UA-GlcNS-UA-GlcNAc-UA <sub>2</sub> S-GlcNS | 8            |
| $\Delta$ UA-GlcNS-UA <sub>2</sub> S-GlcNS-UA-GlcNAc | 11           |
| $\Delta$ UA-GlcNAc-UA-GlcNS-UA <sub>2</sub> S-GlcNS | 6            |
| $\Delta$ UA-GlcNAc-UA <sub>2</sub> S-GlcNS-UA-GlcNS | 7            |
| $\Delta$ UA <sub>2</sub> S-GlcNS-UA-GlcNS-UA-GlcNAc | 8            |
| $\Delta$ UA <sub>2</sub> S-GlcNS-UA-GlcNAc-UA-GlcNS | 9            |

478  
479  
480  
481  
482  
483

484 **Supplementary Table 59.** CCS of B, Y, C and Z ions identified in a  $\Delta$ UA-GlcNS-I2S-GlcNS-G-GlcNAc  
 485 structure.

| #HS1                                 |                   |             |             |             |
|--------------------------------------|-------------------|-------------|-------------|-------------|
| $\Delta$ UA-GlcNS-I2S-GlcNS-G-GlcNAc |                   |             |             |             |
| [M-3H] <sup>3-</sup>                 | 430.05            | 274.0 (0.6) |             |             |
|                                      | (1-) <sup>1</sup> | (2-)        | (1-)        | (2-)        |
| B1                                   | 157.014           | 78.003      | 70.5 (0.9)  | x           |
| B2                                   | 398.039           | 198.516     | 110.1 (0.8) | 119.6 (0.4) |
| B3                                   | 654.028           | 326.510     | x           | 162.0 (0.7) |
| B4                                   | 895.054           | 447.023     | x           | 201.0 (0.7) |
| B5                                   | 1071.086          | 535.039     | x           | x           |
| Y0                                   | 220.082           | 109.537     | x           | x           |
| Y1                                   | 396.114           | 197.553     | 116.1 (0.5) | x           |
| Y2                                   | 637.140           | 318.066     | 151.8 (0.5) | x           |
| Y3                                   | 893.129           | 446.060     | x           | x           |
| Y4                                   | 1134.154          | 566.573     | x           | x           |
| C1                                   | 175.024           | 87.008      | 71.0 (0.6)  | x           |
| C2                                   | 416.050           | 207.521     | 113.6 (0.4) | x           |
| C3                                   | 672.039           | 335.515     | x           | 164.0 (0.8) |
| C4                                   | 913.064           | 456.028     | x           | x           |
| C5                                   | 1089.096          | 544.044     | x           | x           |
| Z0                                   | 202.072           | 100.532     | x           | x           |
| Z1                                   | 378.104           | 188.548     | 113.8 (0.6) | x           |
| Z2                                   | 619.129           | 309.061     | 149.2 (0.2) | x           |
| Z3                                   | 875.118           | 437.055     | x           | 156.2 (0.6) |
| Z4                                   | 1116.144          | 557.568     | x           | x           |

486 <sup>1</sup> Columns represent different charge states.

487 <sup>2</sup> Each CCS is an average of independent measurements with the corresponding standard deviation

488

489 **Supplementary Table 60.** CCS of B, Y, C and Z (-SO<sub>3</sub>) ions identified in a hexasaccharide ΔUA-GlcNS-  
 490 I2S-GlcNS-G-GlcNAc structure.

| #HS1                         |                    |                    |                    |                          |
|------------------------------|--------------------|--------------------|--------------------|--------------------------|
| ΔUA-GlcNS-I2S-GlcNS-G-GlcNAc |                    |                    |                    |                          |
| [M-2H] <sup>2-</sup>         | 605.6              | 225.05 (0.4)       |                    |                          |
| [M-3H] <sup>3-</sup>         | 403.4              | 255.39 (0.1)       |                    |                          |
|                              | - 1SO <sub>3</sub> | - 1SO <sub>3</sub> | - 1SO <sub>3</sub> | - 1SO <sub>3</sub>       |
|                              | (1-) <sup>1</sup>  | (2-)               | (1-)               | (2-)                     |
| B1                           | 77.06              | 38.02              | x                  | x                        |
| B2                           | 318.08             | 158.54             | x                  | x                        |
| B3                           | 574.07             | 286.53             | x                  | 150.3 (0.8) <sup>2</sup> |
| B4                           | 815.10             | 407.04             | x                  | x                        |
| B5                           | 991.13             | 495.06             | x                  | 200.1 (0.6)              |
|                              |                    |                    |                    |                          |
| Y0                           | 140.13             | 69.56              | x                  | x                        |
| Y1                           | 316.16             | 157.57             | x                  | x                        |
| Y2                           | 557.18             | 278.09             | x                  | x                        |
| Y3                           | 813.17             | 406.08             | x                  | 181.47 (0.5)             |
| Y4                           | 1054.20            | 526.59             | x                  | x                        |
|                              |                    |                    |                    |                          |
| C1                           | 95.07              | 47.03              | x                  | x                        |
| C2                           | 336.09             | 167.54             | x                  | x                        |
| C3                           | 592.08             | 295.54             | x                  | x                        |
| C4                           | 833.11             | 416.05             | x                  | 179.5 (0.5)              |
| C5                           | 1009.14            | 504.07             | x                  | x                        |
|                              |                    |                    |                    |                          |
| Z0                           | 122.12             | 60.55              | x                  | x                        |
| Z1                           | 298.15             | 148.57             | x                  | x                        |
| Z2                           | 539.17             | 269.08             | x                  | x                        |
| Z3                           | 795.16             | 397.08             | x                  | x                        |
| Z4                           | 1036.19            | 517.59             | x                  | x                        |

491

492 <sup>1</sup> Columns represent different charge states.

493 <sup>2</sup> Each CCS is an average of independent measurements with the corresponding standard deviation

494

495

496

497 **Supplementary Table 61.** Summary of B, Y, C and Z ions theoretically identified from one of the six  
 498 possible hexasaccharide sequences (dp6 + 5SO<sub>3</sub> + 1NAc) as a result of one glycosidic bond cleavage in  
 499 the structure ΔUA-GlcNS-UA-GlcNAc6S-UA2S-GlcNS6S.

500

| ΔUA-GlcNS-UA-GlcNAc6S-UA2S-GlcNS6S |          |         |         |       |      |      |
|------------------------------------|----------|---------|---------|-------|------|------|
|                                    | (1-)     | (2-)    | (3-)    | (1-)  | (2-) | (3-) |
| B1                                 | 157.014  | 78.003  | 51.666  | ✓     | x    | x    |
| B2                                 | 398.039  | 198.516 | 132.008 | ✓     | ✓    | x    |
| B3                                 | 574.071  | 286.532 | 190.685 | ✓     | ✓    | x    |
| B4                                 | 857.107  | 428.050 | 285.031 | x     | x    | x    |
| B5                                 | 1113.096 | 556.044 | 370.360 | x     | x    | x    |
| Y0                                 | 337.985  | 168.489 | 111.990 | x     | x    | x    |
| Y1                                 | 593.974  | 296.483 | 197.319 | x     | x    | x    |
| Y2                                 | 877.010  | 438.001 | 291.665 | x     | x    | ✓    |
| Y3                                 | 1053.042 | 526.017 | 350.342 | x     | x    | ✓    |
| Y4                                 | 1294.068 | 646.530 | 430.684 | x     | x    | ✓    |
| C1                                 | 175.024  | 87.008  | 57.670  | ✓     | x    | x    |
| C2                                 | 416.050  | 207.521 | 138.011 | ✓     | x    | x    |
| C3                                 | 592.082  | 295.537 | 196.689 | x     | x    | x    |
| C4                                 | 875.118  | 437.055 | 291.034 | x     | x    | x    |
| C5                                 | 1131.107 | 565.050 | 376.364 | x     | x    | x    |
| Z0                                 | 319.974  | 159.483 | 105.986 | x     | x    | x    |
| Z1                                 | 575.963  | 287.478 | 191.316 | x     | x    | x    |
| Z2                                 | 858.999  | 428.996 | 285.661 | x     | x    | x    |
| Z3                                 | 1035.031 | 517.012 | 344.339 | x     | x    | x    |
| Z4                                 | 1276.057 | 637.525 | 424.680 | x     | x    | □    |
|                                    |          |         |         | Total | 9    |      |

501  
 502



503 **Supplementary Table 62.** Summary of B, Y, C and Z ions theoretically identified from one of the six  
 504 possible hexasaccharide sequences (dp6 + 5SO<sub>3</sub> + 1NAc) as a result of one glycosidic bond cleavage in  
 505 the structure ΔUA-GlcNS-UA2S-GlcNS6S-UA-GlcNAc6S.  
 506

| ΔUA-GlcNS-UA2S-GlcNS6S-UA-GlcNAc6S |          |         |         |       |      |      |
|------------------------------------|----------|---------|---------|-------|------|------|
|                                    | (1-)     | (2-)    | (3-)    | (1-)  | (2-) | (3-) |
| B1                                 | 157.014  | 78.003  | 51.666  | ✓     | x    | x    |
| B2                                 | 398.039  | 198.516 | 132.008 | ✓     | ✓    | x    |
| B3                                 | 654.028  | 326.510 | 217.338 | ✓     | ✓    | x    |
| B4                                 | 975.011  | 487.001 | 324.332 | x     | ✓    | x    |
| B5                                 | 1151.043 | 575.017 | 383.009 | x     | x    | ✓    |
| Y0                                 | 300.039  | 149.516 | 99.341  | ✓     | x    | x    |
| Y1                                 | 476.071  | 237.532 | 158.018 | ✓     | ✓    | x    |
| Y2                                 | 797.053  | 398.023 | 265.013 | x     | x    | ✓    |
| Y3                                 | 1053.042 | 526.017 | 350.342 | x     | x    | ✓    |
| Y4                                 | 1294.068 | 646.530 | 430.684 | x     | x    | ✓    |
| C1                                 | 175.024  | 87.008  | 57.670  | ✓     | x    | x    |
| C2                                 | 416.050  | 207.521 | 138.011 | ✓     | x    | x    |
| C3                                 | 672.039  | 335.515 | 223.341 | ✓     | x    | x    |
| C4                                 | 993.021  | 496.007 | 330.335 | x     | x    | x    |
| C5                                 | 1169.053 | 584.023 | 389.013 | x     | ✓    | x    |
| Z0                                 | 282.028  | 140.510 | 93.338  | ✓     | x    | x    |
| Z1                                 | 458.060  | 228.526 | 152.015 | ✓     | ✓    | x    |
| Z2                                 | 779.043  | 389.018 | 259.009 | x     | x    | ✓    |
| Z3                                 | 1035.032 | 517.012 | 344.339 | x     | x    | x    |
| Z4                                 | 1276.057 | 637.525 | 424.681 | x     | x    | ✓    |
|                                    |          |         |         | Total | 18   |      |

507  
 508  
 509

510 **Supplementary Table 63.** Summary of B, Y, C and Z ions theoretically identified from one of the six  
 511 possible hexasaccharide sequences (dp6 + 5SO<sub>3</sub> + 1NAc) as a result of one glycosidic bond cleavage in  
 512 the structure ΔUA-GlcNAc6S-UA-GlcNS-UA2S-GlcNS6S  
 513

| ΔUA-GlcNAc6S-UA-GlcNS-UA2S-GlcNS6S |          |         |         |       |      |      |
|------------------------------------|----------|---------|---------|-------|------|------|
|                                    | (1-)     | (2-)    | (3-)    | (1-)  | (2-) | (3-) |
| B1                                 | 157.014  | 78.003  | 51.666  | ✓     | x    | x    |
| B2                                 | 440.050  | 219.521 | 146.011 | x     | x    | x    |
| B3                                 | 616.082  | 307.537 | 204.689 | x     | ✓    | x    |
| B4                                 | 857.107  | 428.050 | 285.031 | x     | ✓    | x    |
| B5                                 | 1113.096 | 556.044 | 370.360 | x     | x    | x    |
| Y0                                 | 337.985  | 168.489 | 111.990 | x     | x    | x    |
| Y1                                 | 593.974  | 296.483 | 197.319 | x     | x    | x    |
| Y2                                 | 835.000  | 416.996 | 277.661 | x     | x    | x    |
| Y3                                 | 1011.032 | 505.012 | 336.339 | x     | x    | x    |
| Y4                                 | 1294.068 | 646.530 | 430.684 | x     | x    | x    |
| C1                                 | 175.024  | 87.008  | 57.670  | ✓     | x    | x    |
| C2                                 | 458.060  | 228.526 | 152.015 | ✓     | ✓    | x    |
| C3                                 | 634.092  | 316.542 | 210.692 | x     | x    | x    |
| C4                                 | 875.118  | 437.055 | 291.034 | x     | x    | x    |
| C5                                 | 1131.107 | 565.050 | 376.364 | x     | x    | x    |
| Z0                                 | 319.975  | 159.483 | 105.986 | x     | x    | x    |
| Z1                                 | 575.963  | 287.478 | 191.316 | x     | x    | x    |
| Z2                                 | 816.989  | 407.991 | 271.658 | x     | x    | x    |
| Z3                                 | 993.021  | 496.007 | 330.335 | x     | x    | x    |
| Z4                                 | 1276.057 | 637.525 | 424.681 | x     | x    | x    |
|                                    |          |         |         | Total | 5    |      |

514

515 **Supplementary Table 64.** Summary of B, Y, C and Z ions theoretically identified from one of the six  
 516 possible hexasaccharide sequences (dp6 + 5SO<sub>3</sub> + 1NAc) as a result of one glycosidic bond cleavage in  
 517 the structure ΔUA-GlcNAc6S-UA2S-GlcNS6S-UA-GlcNS  
 518

| ΔUA-GlcNAc6S-UA2S-GlcNS6S-UA-GlcNS |          |         |         |       |      |      |
|------------------------------------|----------|---------|---------|-------|------|------|
|                                    | (1-)     | (2-)    | (3-)    | (1-)  | (2-) | (3-) |
| B1                                 | 157.014  | 78.003  | 51.666  | ✓     | x    | x    |
| B2                                 | 440.050  | 219.521 | 146.011 | x     | x    | x    |
| B3                                 | 696.039  | 347.515 | 231.341 | x     | x    | x    |
| B4                                 | 1017.021 | 508.007 | 338.335 | x     | x    | x    |
| B5                                 | 1193.053 | 596.023 | 397.013 | x     | x    | x    |
| Y0                                 | 258.028  | 128.510 | 85.338  | x     | x    | x    |
| Y1                                 | 434.060  | 216.526 | 144.015 | ✓     | ✓    | x    |
| Y2                                 | 755.043  | 377.018 | 251.009 | x     | x    | x    |
| Y3                                 | 1011.032 | 505.012 | 336.339 | x     | x    | x    |
| Y4                                 | 1294.068 | 646.530 | 430.684 | x     | x    | x    |
| C1                                 | 175.024  | 87.008  | 57.670  | ✓     | x    | x    |
| C2                                 | 458.060  | 228.526 | 152.015 | ✓     | ✓    | x    |
| C3                                 | 714.049  | 356.521 | 237.345 | x     | x    | x    |
| C4                                 | 1035.032 | 517.012 | 344.339 | x     | ✓    | x    |
| C5                                 | 1211.064 | 605.028 | 403.016 | x     | x    | x    |
| Z0                                 | 240.018  | 119.505 | 79.334  | ✓     | x    | x    |
| Z1                                 | 416.050  | 207.521 | 138.011 | ✓     | ✓    | x    |
| Z2                                 | 737.032  | 368.012 | 245.006 | x     | x    | ✓    |
| Z3                                 | 993.021  | 496.007 | 330.335 | x     | x    | x    |
| Z4                                 | 1276.057 | 637.525 | 424.681 | x     | x    | x    |
|                                    |          |         |         | Total | 8    |      |

519  
 520

521 **Supplementary Table 65.** Summary of B, Y, C and Z ions theoretically identified from one of the six  
 522 possible hexasaccharide sequences (dp6 + 5SO<sub>3</sub> + 1NAc) as a result of one glycosidic bond cleavage in  
 523 the structure ΔUA2S-GlcNS6S-UA-GlcNS-UA-GlcNAc6S  
 524

| ΔUA2S-GlcNS6S-UA-GlcNS-UA-GlcNAc6S |          |         |         |       |      |      |
|------------------------------------|----------|---------|---------|-------|------|------|
|                                    | (1-)     | (2-)    | (3-)    | (1-)  | (2-) | (3-) |
| B1                                 | 236.970  | 117.981 | 78.318  | x     | x    | x    |
| B2                                 | 557.953  | 278.473 | 185.312 | x     | x    | x    |
| B3                                 | 733.985  | 366.489 | 243.990 | x     | x    | x    |
| B4                                 | 975.011  | 487.001 | 324.332 | x     | x    | x    |
| B5                                 | 1151.043 | 575.017 | 383.009 | x     | ✓    | x    |
| Y0                                 | 300.039  | 149.516 | 99.341  | ✓     | x    | x    |
| Y1                                 | 476.071  | 237.532 | 158.018 | ✓     | ✓    | x    |
| Y2                                 | 717.097  | 358.044 | 238.360 | ✓     | ✓    | x    |
| Y3                                 | 893.129  | 446.060 | 297.038 | x     | ✓    | x    |
| Y4                                 | 1214.111 | 606.552 | 404.032 | x     | x    | x    |
| C1                                 | 254.981  | 126.987 | 84.322  | ✓     | x    | x    |
| C2                                 | 575.963  | 287.478 | 191.316 | x     | x    | x    |
| C3                                 | 751.996  | 375.494 | 249.993 | x     | x    | x    |
| C4                                 | 993.021  | 496.007 | 330.335 | x     | ✓    | x    |
| C5                                 | 1169.053 | 584.023 | 389.013 | x     | ✓    | ✓    |
| Z0                                 | 282.028  | 140.510 | 93.338  | ✓     | x    | x    |
| Z1                                 | 458.060  | 228.526 | 152.015 | ✓     | ✓    | x    |
| Z2                                 | 699.086  | 349.039 | 232.357 | x     | ✓    | x    |
| Z3                                 | 875.118  | 437.055 | 291.034 | x     | x    | x    |
| Z4                                 | 1196.101 | 597.546 | 398.028 | x     | x    | x    |
|                                    |          |         |         | Total | 11   |      |

525

526 **Supplementary Table 66.** Summary of B, Y, C and Z ions theoretically identified from one of the six  
 527 possible hexasaccharide sequences (dp6 + 5SO<sub>3</sub> + 1NAc) as a result of one glycosidic bond cleavage in  
 528 the structure ΔUA2S-GlcNS6S-UA-GlcNAc6S-UA-GlcNS  
 529

| ΔUA2S-GlcNS6S-UA-GlcNAc6S-UA-GlcNS |          |         |         |       |      |      |
|------------------------------------|----------|---------|---------|-------|------|------|
|                                    | (1-)     | (2-)    | (3-)    | (1-)  | (2-) | (3-) |
| B1                                 | 236.970  | 117.981 | 78.318  | x     | x    | x    |
| B2                                 | 557.953  | 278.473 | 185.312 | x     | x    | x    |
| B3                                 | 733.985  | 366.489 | 243.990 | x     | x    | x    |
| B4                                 | 1017.021 | 508.007 | 338.335 | x     | x    | x    |
| B5                                 | 1193.053 | 596.023 | 397.013 | x     | x    | x    |
| Y0                                 | 258.028  | 128.510 | 85.338  | x     | x    | x    |
| Y1                                 | 434.060  | 216.526 | 144.015 | ✓     | ✓    | x    |
| Y2                                 | 717.097  | 358.044 | 238.360 | ✓     | ✓    | x    |
| Y3                                 | 893.129  | 446.060 | 297.038 | x     | ✓    | x    |
| Y4                                 | 1214.111 | 606.552 | 404.032 | x     | x    | x    |
| C1                                 | 254.981  | 126.987 | 84.322  | x     | x    | x    |
| C2                                 | 575.963  | 287.478 | 191.316 | x     | x    | x    |
| C3                                 | 751.996  | 375.494 | 249.993 | x     | x    | x    |
| C4                                 | 1035.032 | 517.012 | 344.339 | x     | ✓    | x    |
| C5                                 | 1211.064 | 605.028 | 403.016 | x     | x    | x    |
| Z0                                 | 240.018  | 119.505 | 79.334  | ✓     | x    | x    |
| Z1                                 | 416.050  | 207.521 | 138.011 | ✓     | ✓    | x    |
| Z2                                 | 699.086  | 349.039 | 232.357 | x     | ✓    | x    |
| Z3                                 | 875.118  | 437.055 | 291.034 | x     | x    | x    |
| Z4                                 | 1196.101 | 597.546 | 398.028 | x     | x    | x    |
|                                    |          |         |         | Total | 7    |      |

530  
 531

532 **Supplementary Table 67.** Summary overview of the B, Y, C and Z ions theoretically identified from one  
533 glycosidic bond cleavage in the purified oligosaccharide.

534  
535

| Possible structures                        | B/Y/C/Z ions |
|--------------------------------------------|--------------|
| $\Delta$ UA-GlcNS-UA-GlcNAc6S-UA2S-GlcNS6S | 9            |
| $\Delta$ UA-GlcNS-UA2S-GlcNS6S-UA-GlcNAc6S | 18           |
| $\Delta$ UA-GlcNAc6S-UA-GlcNS-UA2S-GlcNS6S | 5            |
| $\Delta$ UA-GlcNAc6S-UA2S-GlcNS6S-UA-GlcNS | 8            |
| $\Delta$ UA2S-GlcNS6S-UA-GlcNS-UA-GlcNAc6S | 11           |
| $\Delta$ UA2S-GlcNS6S-UA-GlcNAc6S-UA-GlcNS | 7            |

536  
537  
538  
539

540 **Supplementary Table 68.** CCS of B, Y, C and Z ions identified in a  $\Delta$ UA-GlcNS-I2S-GlcNS6S-UA-  
 541 GlcNAc6S structure.

| #HS2                                     |                   |                          |         |             |             |             |
|------------------------------------------|-------------------|--------------------------|---------|-------------|-------------|-------------|
| $\Delta$ UA-GlcNS-I2S-GlcNS6S-G-GlcNAc6S |                   |                          |         |             |             |             |
| [M-2H] <sup>2-</sup>                     | 362.26            | 331.0 (0.2) <sup>2</sup> |         |             |             |             |
| [M-3H] <sup>3-</sup>                     | 483.35            | 265.7 (0.4)              |         |             |             |             |
|                                          | (1-) <sup>1</sup> | (2-)                     | (3-)    | (1-)        | (2-)        | (3-)        |
| B1                                       | 157.014           | 78.003                   | 51.666  | 70.4 (0.8)  | x           | x           |
| B2                                       | 398.039           | 198.516                  | 132.008 | 110.3 (0.5) | x           | x           |
| B3                                       | 654.028           | 326.510                  | 217.338 | x           | 162.4 (0.2) | x           |
| B4                                       | 975.011           | 487.001                  | 324.332 | x           | 225.3 (0.5) | x           |
| B5                                       | 1151.043          | 575.017                  | 383.009 | x           | x           | 272.9 (0.4) |
| Y0                                       | 300.039           | 149.516                  | 99.341  | 94.7 (0.3)  | x           | x           |
| Y1                                       | 476.071           | 237.532                  | 158.018 | 123.2 (0.5) | 134.1 (0.5) | x           |
| Y2                                       | 797.053           | 398.023                  | 265.013 | x           | x           | 199.6 (0.6) |
| Y3                                       | 1053.042          | 526.017                  | 350.342 | x           | x           | 250.4 (0.5) |
| Y4                                       | 1294.068          | 646.530                  | 430.684 | x           | x           | 276.9 (0.4) |
| C1                                       | 175.024           | 87.008                   | 57.670  | 70.4 (0.6)  | x           | x           |
| C2                                       | 416.050           | 207.521                  | 138.011 | x           | x           | x           |
| C3                                       | 672.039           | 335.515                  | 223.341 | 146.9 (0.7) | x           | x           |
| C4                                       | 993.021           | 496.007                  | 330.335 | x           | x           | x           |
| C5                                       | 1169.053          | 584.023                  | 389.013 | x           | x           | x           |
| Z0                                       | 282.028           | 140.510                  | 93.338  | 93.2 (0.5)  | x           | x           |
| Z1                                       | 458.060           | 228.526                  | 152.015 | 120.5 (0.3) | x           | x           |
| Z2                                       | 779.043           | 389.018                  | 259.009 | X           | x           | x           |
| Z3                                       | 1035.032          | 517.012                  | 344.339 | x           | x           | x           |
| Z4                                       | 1276.057          | 637.525                  | 424.681 | x           | x           | x           |

542 <sup>1</sup> Columns represent different charge states.

543 <sup>2</sup> Each CCS is an average of independent measurements with the corresponding standard deviation

544

545

546 **Supplementary Table 69.** CCS of B, Y, C and Z (-SO<sub>3</sub>) ions identified in a hexasaccharide ΔUA-GlcNS-  
 547 I2S-GlcNS6S-G-GlcNAc6S structure.

| #HS2                             |                    |                    |                          |                    |
|----------------------------------|--------------------|--------------------|--------------------------|--------------------|
| ΔUA-GlcNS-I2S-GlcNS6S-G-GlcNAc6S |                    |                    |                          |                    |
| [M-3H] <sup>3-</sup>             | 342.27             | 318.8 (0.5)        |                          |                    |
|                                  | - 1SO <sub>3</sub> | - 1SO <sub>3</sub> | - 1SO <sub>3</sub>       | - 1SO <sub>3</sub> |
|                                  | (1-) <sup>1</sup>  | (2-)               | (1-)                     | (2-)               |
| B1                               | 77.06              | 38.02              | x                        | x                  |
| B2                               | 318.08             | 158.54             | x                        | x                  |
| B3                               | 574.07             | 286.53             | x                        | x                  |
| B4                               | 895.05             | 447.02             | x                        | x                  |
| B5                               | 1071.09            | 535.04             | x                        | x                  |
|                                  |                    |                    |                          |                    |
| Y0                               | 220.08             | 109.54             | x                        | x                  |
| Y1                               | 396.11             | 197.55             | x                        | x                  |
| Y2                               | 717.10             | 358.04             | x                        | x                  |
| Y3                               | 973.09             | 486.04             | x                        | x                  |
| Y4                               | 1214.11            | 606.55             | x                        | x                  |
|                                  |                    |                    |                          |                    |
| C1                               | 95.07              | 47.03              | x                        | x                  |
| C2                               | 336.09             | 167.54             | x                        | x                  |
| C3                               | 592.08             | 295.54             | 145.7 (0.6) <sup>2</sup> | x                  |
| C4                               | 913.06             | 456.03             | x                        | x                  |
| C5                               | 1089.10            | 544.04             | x                        | x                  |
|                                  |                    |                    |                          |                    |
| Z0                               | 202.07             | 100.53             | x                        | x                  |
| Z1                               | 378.10             | 188.55             | x                        | x                  |
| Z2                               | 699.09             | 349.04             | x                        | x                  |
| Z3                               | 955.08             | 477.03             | x                        | x                  |
| Z4                               | 1196.10            | 597.55             | x                        | x                  |

548  
 549 <sup>1</sup> Columns represent different charge states.

550 <sup>2</sup> Each CCS is an average of independent measurements with the corresponding standard deviation

551  
 552  
 553
